## **Retrotransposon instability dominates the acquired mutation landscape of mouse induced pluripotent stem cells**

Patricia Gerdes<sup>1,10</sup>, Sue Mei Lim<sup>2,3,4,10</sup>, Adam D. Ewing<sup>1,10</sup>, Michael R. Larcombe<sup>2,3,4</sup>, Dorothy Chan<sup>1</sup>, Francisco J. Sanchez-Luque<sup>1,5</sup>, Lucinda Walker<sup>1</sup>, Cini James<sup>1</sup>, Anja S. Knaupp<sup>2,3,4</sup>, Patricia E. Carreira<sup>1</sup>, Christian M. Nefzger<sup>2,3,4</sup>, Ryan Lister<sup>6,7</sup>, Sandra R. Richardson<sup>1,\*</sup>, Jose M. Polo<sup>2,3,4,9,\*</sup>, and Geoffrey J. Faulkner<sup>1,8,\*</sup>

<sup>1</sup>Mater Research Institute - University of Queensland, TRI Building, Woolloongabba QLD 4102, Australia.

<sup>2</sup>Department of Anatomy & Developmental Biology, Monash University, Melbourne VIC 3800, Australia.

<sup>3</sup>Development and Stem Cells Program, Monash Biomedicine Discovery Institute, Melbourne VIC 3800, Australia.

<sup>4</sup>Australian Regenerative Medicine Institute, Monash University, Melbourne VIC 3800, Australia.

<sup>5</sup>GENYO. Pfizer-University of Granada-Andalusian Government Centre for Genomics and Oncological Research, PTS Granada 18016, Spain.

<sup>6</sup>Australian Research Council Centre of Excellence in Plant Energy Biology, School of Molecular Sciences, The University of Western Australia, Perth WA 6009, Australia.

<sup>7</sup>Harry Perkins Institute of Medical Research, Perth WA 6009, Australia.

<sup>8</sup>Queensland Brain Institute, University of Queensland, Brisbane QLD 4072, Australia.

<sup>9</sup>Adelaide Centre for Epigenetics and The South Australian Immunogenomics Cancer Institute, The University of Adelaide, Adelaide SA 5005, Australia.

<sup>10</sup>These authors contributed equally

\*Corresponding authors: [sandra.richardson@mater.uq.edu.au](mailto:sandra.richardson@mater.uq.edu.au) (S.R.R.); [jose.polo@monash.edu](mailto:jose.polo@monash.edu) (J.M.P.); [faulknergj@gmail.com](mailto:faulknergj@gmail.com) (G.J.F.)

## 1 **Abstract**

2 Induced pluripotent stem cells (iPSCs) may differentiate into any cell of the body and as such have  
3 revolutionized biomedical research and regenerative medicine. Unlike their human counterparts,  
4 mouse iPSCs (miPSCs) are reported to silence transposable elements (TEs) and prevent TE-  
5 mediated mutagenesis. Here we applied short- or long-read genome sequencing to 30 bulk miPSC  
6 lines reprogrammed from 10 parental cell types, as well as 18 single-cell miPSC clones. While  
7 single nucleotide variants and structural variants restricted to miPSCs were rare, we found 55 *de*  
8 *novo* TE insertions, including examples intronic to *Brca1* and *Dmd*. LINE-1 (L1) retrotransposon  
9 families were profoundly hypomethylated in miPSCs, beyond other TEs and the genome overall,  
10 and harbored alternative promoters for protein-coding genes. Treatment with the L1 reverse  
11 transcriptase inhibitor lamivudine did not hinder reprogramming, pointing to a viable strategy to  
12 block retrotransposition. These experiments reveal the complete spectrum and potential  
13 significance of mutations acquired by miPSCs.

14

## 15 **Introduction**

16 Induced pluripotent stem cells (iPSCs) resemble embryonic stem cells (ESCs) in their near  
17 unlimited capacity for self-renewal and differentiation potential<sup>1</sup>. These properties have driven  
18 widespread uptake of iPSCs in clinical and research applications<sup>2-4</sup>. Despite their immense  
19 therapeutic promise, the reprogramming process required to generate iPSCs can produce genomic  
20 and epigenomic aberrations<sup>4-8</sup>. These abnormalities could undermine the functional equivalence  
21 of iPSCs and ESCs, or alter the phenotype of iPSC-derived differentiated cells, and hence  
22 necessitate genetic and functional screening of iPSCs prior to their use in the clinic<sup>9</sup>. Fortunately,  
23 whole genome sequencing (WGS) based analyses of single nucleotide variants (SNVs), copy  
24 number variants, and structural variants (SVs) restricted to human and mouse iPSC lines have  
25 found relatively few conclusive reprogramming-associated mutations<sup>10-12</sup>. Instead, most mutations  
26 acquired by iPSCs appear to occur before and after reprogramming<sup>10,11,13</sup>, implying they are not  
27 caused by molecular processes inherent to iPSC generation. Transposable elements (TEs) may  
28 present an important exception to this rule, where the attainment of a pluripotent state via  
29 reprogramming leaves iPSCs vulnerable to TE-mediated mutagenesis.

30 The retrotransposon long interspersed element 1 (LINE-1, or L1) is active in nearly all  
31 mammals<sup>14</sup>. L1 autonomously mobilizes via a copy-and-paste process called target-primed reverse

32 transcription (TPRT), which involves reverse transcription of L1 mRNA *in cis*, and is  
33 characterized by the generation of target site duplications (TSDs) upon L1 integration<sup>15–20</sup>. The  
34 C57BL/6 mouse reference genome contains ~3,000 potentially mobile L1 copies belonging to  
35 three subfamilies (T<sub>F</sub>, G<sub>F</sub> and A) defined by their monomeric 5' promoter sequences, in addition  
36 to several active endogenous retrovirus (ERV) and short interspersed element (SINE) families<sup>21–</sup>  
37 <sup>23</sup>. By contrast, only ~100 mobile L1s from the transcribed subset Ta (-Ta)<sup>24</sup> subfamily are present  
38 in each individual human genome, with the vast majority of retrotransposition potential  
39 concentrated in fewer than 10 of these elements<sup>25,26</sup>. Perhaps owing to the disparate count of mobile  
40 TEs in each species, the rate of L1 mobilization in the mouse germline is estimated to be at least  
41 an order of magnitude higher than that of humans<sup>27–30</sup>.

42 TE mobility is regulated by DNA methylation and histone modifications, as well as various  
43 post-transcriptional and post-translational mechanisms<sup>31–41</sup>. Reprogramming somatic cells to  
44 generate human iPSCs (hiPSCs) and mouse iPSCs (miPSCs) leads to epigenome-wide remodeling,  
45 including broad de-repression of L1 promoters<sup>7,42–47</sup>. L1 mRNA transcription increases strongly  
46 during reprogramming, and remains approximately 10-fold higher in cultured miPSCs than in  
47 parental mouse embryonic fibroblasts (MEFs)<sup>46</sup>. As a corollary, the early mouse embryo is a major  
48 niche for new heritable L1 retrotransposition events<sup>28</sup>. Mouse ESCs cultured in standard media  
49 containing serum express endogenous L1 proteins and support engineered L1 mobilization<sup>41</sup>.  
50 Naïve ESCs grown in media containing two small-molecule kinase inhibitors (2i) in place of serum  
51 also exhibit L1 promoter hypomethylation<sup>37,48</sup>. Engineered and endogenous L1 retrotransposition  
52 are supported by hiPSCs and ESCs<sup>45,49–51</sup>. Collectively, these observations suggest L1  
53 hypomethylation may be an intrinsic aspect of pluripotency accentuated by the molecular roadmap  
54 to an induced pluripotent state. Consequently, miPSCs are likely to harbor *de novo*  
55 retrotransposition events. A prior WGS analysis of 3 miPSC lines, employing paired-end 42mer  
56 reads and ~11× genome-wide sequencing depth, however found no *de novo* TE insertions, and  
57 concluded that endogenous retrotransposition did not occur during miPSC production<sup>12</sup>. The  
58 apparent lack of TE mobility in this context remains an unresolved and yet potentially important  
59 source of miPSC mutagenesis<sup>4</sup>.

60

## 61 **Results**

### 62 **Mutational spectra of bulk miPSC populations generated from diverse cell lineages**

63 To survey genomic variation among miPSC lines generated from a broad range of parental cell  
64 types, we bred triple transgenic C57BL/6×129S4Sv/Jae animals carrying a GFP reporter knocked  
65 into the *Oct4* locus (*Oct4*-GFP), a transcriptional activator (m2rtTA) under the control of the  
66 ubiquitously expressed Rosa26 locus (R26-m2rtTA), and a doxycycline-inducible polycistronic  
67 reprogramming cassette (Col1a1-tetO-OKSM)<sup>52</sup>. From each of three animals (labeled A67, A82  
68 and A172), we used fluorescence activated cell sorting (FACS) and a range of surface markers to  
69 isolate nine isogenic primary cell populations, including three representing each germ layer (**Fig.**  
70 **1a**). Bulk cultures were then treated with doxycycline to induce reprogramming, followed by  
71 FACS to purify *Oct4*-GFP<sup>+</sup> miPSCs. Twenty-six miPSC lines were successfully expanded and  
72 cultured in standard media containing serum (**Supplementary Table 1** and **Extended Data Fig.**  
73 **1**). Illumina paired-end 150mer read WGS (~41× average genome-wide depth) was then applied  
74 to each miPSC line at passage 4 (p4), as well as to 3 MEF genotypic controls (**Supplementary**  
75 **Table 1**).

76 Concordant SNVs detected by GATK HaplotypeCaller and freebayes<sup>53,54</sup> were filtered to  
77 remove known mouse strain germline variants<sup>55</sup>, yielding 3,603 SNVs private to a single miPSC  
78 line (average ~140 per line) (**Supplementary Table 2**). Of these, 27 in total were non-synonymous  
79 exonic mutations (**Supplementary Table 2**). We then called concordant SVs using Delly and  
80 GRIDSS<sup>56,57</sup>, finding 34 private SVs (~1 per line). These included a 210kbp deletion of the *de*  
81 *novo* methyltransferase *Dnmt3a* in miPSCs derived from the hematopoietic stem cells of animal  
82 A172 (**Supplementary Table 2**). Considering private SNVs and SVs together, we observed no  
83 significant (p<0.05, one-way ANOVA with Tukey's multiple comparison test) difference in  
84 miPSC variant counts associated with parental cell type or germ layer, and SNV and SV rates  
85 resembled those found previously for fibroblast-derived miPSCs<sup>10,12</sup>. This result broadly suggested  
86 that choice of primary cell type, at least among the diverse panel assembled here, may not  
87 significantly impact the frequency of SNVs and SVs later found in miPSC lines.

88

### 89 **Bulk miPSC populations harbor *de novo* L1 insertions**

90 As *de novo* TE insertions can be overlooked by generalized SV calling algorithms<sup>58</sup>, we used  
91 TEBreak<sup>59</sup> to identify non-reference TE insertions. Known non-reference genome TE insertions<sup>55</sup>,  
92 and those found in MEF genotypic controls or multiple miPSC lines, were filtered, leaving 4  
93 putative *de novo* L1 T<sub>F</sub> insertions (**Fig. 1b-d, Table 1, Extended Data Fig. 2, Supplementary**

**a**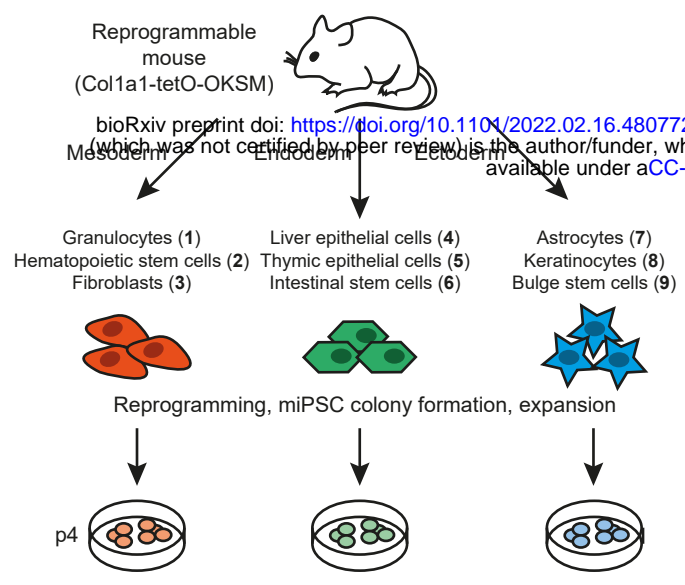**b**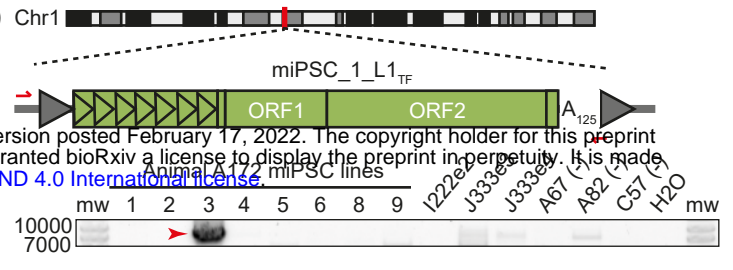**c**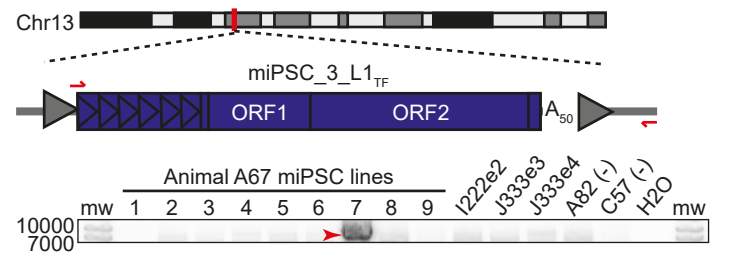**d**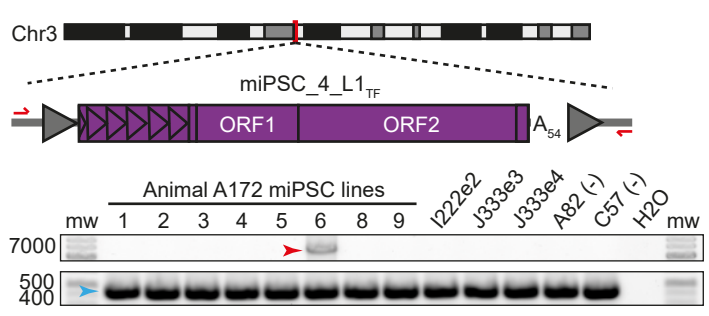**e**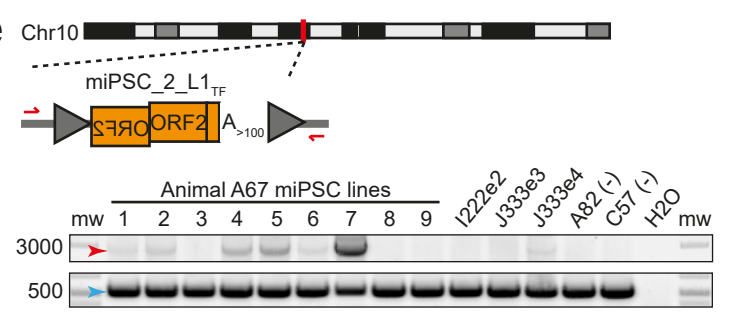**f**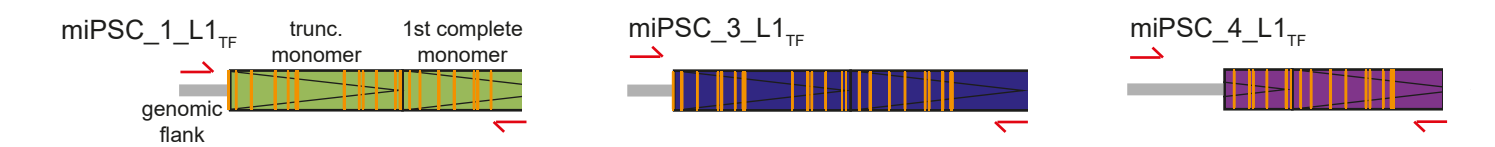**g**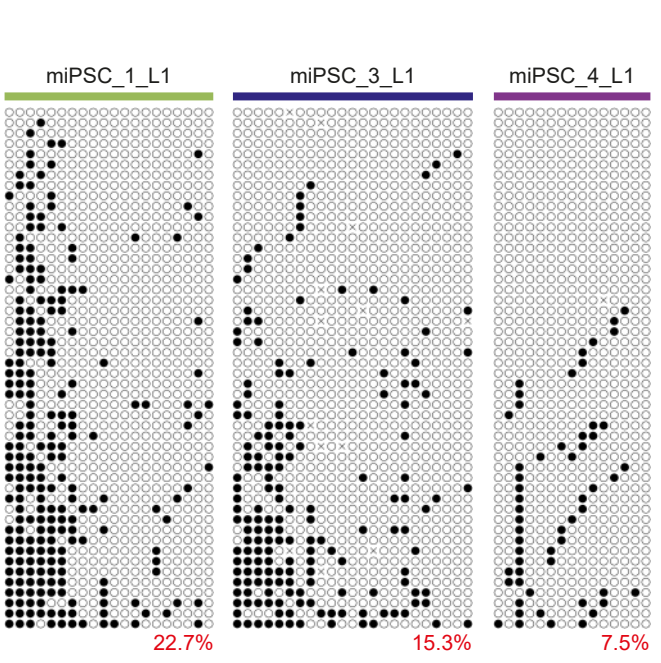**h**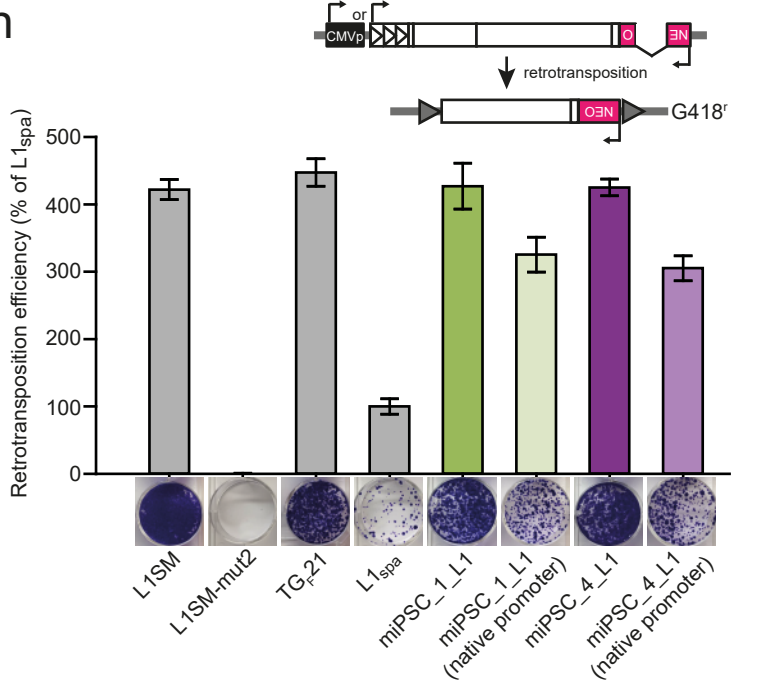

**Fig. 1: *De novo* L1 insertions in germ layer specific bulk expanded miPSC lines.** **a**, Experimental design of bulk miPSC generation using a Colla1-tetO-OKSM mouse model containing a doxycycline-inducible reprogramming cassette. Tissues were isolated and sorted by FACS to obtain 9 primary cell types (named and numbered 1-9) from each of 3 mice (A67, A82, A172). Upon reprogramming, GFP-positive miPSCs were sorted and expanded in cell culture. DNA was extracted from miPSCs, sequenced via WGS and mRC-seq, and analyzed for *de novo* L1 insertions with TELBreak. Note: astrocyte-derived miPSCs were not produced for animal A172. **b**, A full-length (6.8 monomers) intergenic *de novo* L1 T<sub>F</sub> insertion. Promoter monomers are shown as triangles within the L1 5'UTR. PolyA (A<sub>n</sub>) tract length is indicated immediately 3' of the L1. Target site duplications (TSDs) are depicted as grey arrows flanking the L1. PCR validation primers are shown as red arrows. A PCR validation agarose gel containing the full-length PCR product (red arrow) only in the fibroblast-derived miPSC line where the L1 was detected by genomic analysis is shown. miPSC line numbers are provided in panel (a). DNA from other animals included in the study are shown at right as controls. **c**, As for panel (b), except for an L1 T<sub>F</sub> with 5.8 promoter monomers. **d**, As for panel (b), except for an L1 T<sub>F</sub> with 5.3 promoter monomers, and using an empty/filled PCR design where both primers are outside of the L1 insertion, generating “filled” L1 (red arrow) and “empty” wild-type (blue arrow) products. **e**, As for panel (b), except showing a 5' truncated and inverted/deleted L1 T<sub>F</sub> insertion and using an empty/filled PCR validation design, as per panel (d). **f**, Locus-specific methylation analysis schematic representation for 3 full-length *de novo* L1 insertions (panels b-d). After bisulfite conversion, the 5' monomeric sequences of each L1 were PCR amplified using primer pairs (red arrows) specific to that locus. Amplicons were then pooled and sequenced as 2×300mer Illumina reads. Orange strokes indicate CpG dinucleotides covered by the assay. **g**, Methylation of the 3 L1 promoter sequences shown in panel (f), in the miPSC line where each *de novo* L1 insertion was identified. Each cartoon panel corresponds to an amplicon and displays 50 non-identical sequences (black circle, methylated CpG; white circle, unmethylated CpG; ×, mutated CpG) extracted at random from a much larger pool of available Illumina reads. The percentage of methylated CpG is indicated in the lower right corner of each cartoon in red. **h**, *top*: Rationale of a cultured cell retrotransposition assay<sup>19,66</sup>. A mouse L1 driven by a native or CMV promoter (CMVp) is tagged with an antisense orientated neomycin (NEO) reporter cassette interrupted by an intron. Cells harboring this construct become NEO (G418) resistant upon retrotransposition. *bottom*: Retrotransposition assays conducted in HeLa cells. Constructs included: L1SM<sup>67</sup>, a highly mobile synthetic L1 (positive control); L1SMmut2, L1SM with endonuclease and reverse transcriptase active site mutations (negative control); TG<sub>F</sub>21, a mobile L1 G<sub>F</sub> element<sup>21</sup>; L1<sub>spa</sub>, a mobile L1 T<sub>F</sub> element<sup>22</sup>; miPSC\_1\_L1 (panel b); miPSC\_4\_L1 (panel d). Data were normalized to L1<sub>spa</sub> and are shown as mean ± SD of three independent biological replicates, each of which comprised three technical replicates. Representative well pictures are shown below each construct. Note: L1SM retrotransposed very efficiently, leading to cell colony crowding in wells, and a likely underestimate of retrotransposition. Unless otherwise stated, L1 constructs were expressed from CMVp.

**Table 1: *De novo* TE insertions detected in miPSC lines by Illumina sequencing.**

| Insertion # | Subfamily      | Location | Monomers | Cleavage | TSD (bp) | PolyA (bp) | Origin        |
|-------------|----------------|----------|----------|----------|----------|------------|---------------|
| miPSC_1_L1  | T <sub>F</sub> | 1q       | 6.8      | TCTT/AG  | 16       | ~125       | Reprogramming |
| miPSC_2_L1  | T <sub>F</sub> | 10q      | 0        | TTCT/GT  | 14       | >100       | Mosaic        |
| miPSC_3_L1  | T <sub>F</sub> | 13q      | 5.8      | ATTC/AA  | 15       | ~50        | Reprogramming |
| miPSC_4_L1  | T <sub>F</sub> | 3q       | 5.3      | TCTT/AA  | 13       | ~54        | Reprogramming |
| miPSC_5_L1  | G <sub>F</sub> | 19q      | 2        | TTAT/AT  | 14       | ~50        | Reprogramming |
| miPSC_6_L1  | T <sub>F</sub> | 7q       | 0        | TTTA/AA  | 17       | ~51        | Reprogramming |
| miPSC_7_L1  | G <sub>F</sub> | Xq       | 5        | TCTT/AT  | 16       | >80        | Reprogramming |
| miPSC_8_L1  | T <sub>F</sub> | 19q      | 3.7      | TTTC/AA  | 19       | ~24        | Reprogramming |
| miPSC_9_B2  | B2             | 11q      | NA       | TCTT/AC  | 16       | >60        | Reprogramming |
| miPSC_10_L1 | T <sub>F</sub> | 12q      | 0        | TTTT/GT  | 6        | ~36*       | Reprogramming |
| miPSC_11_B2 | B2             | 13q      | NA       | TTTT/GA  | 14       | >73        | Reprogramming |
| miPSC_12_L1 | T <sub>F</sub> | 13q      | 0        | TCTT/AG  | 17       | ~97        | Reprogramming |
| miPSC_13_L1 | A              | 14q      | 3        | TTTC/AT  | 13       | ~46        | Reprogramming |
| miPSC_14_B2 | B2             | 15q      | NA       | TTTT/AC  | 16       | >66        | Reprogramming |
| miPSC_15_L1 | G <sub>F</sub> | 2q       | 0        | TTTC/AA  | 17       | ~28*       | Reprogramming |
| miPSC_16_L1 | T <sub>F</sub> | 2q       | >3       | TTTT/AA  | 16       | >100       | Reprogramming |
| miPSC_17_L1 | T <sub>F</sub> | 3q       | >3       | ACTT/AA  | 14       | ~45        | Reprogramming |
| miPSC_18_B1 | B1             | 3q       | NA       | TTTT/AA  | 15       | ~30        | Reprogramming |
| miPSC_19_L1 | T <sub>F</sub> | 3q       | >3       | GTTT/AT  | 15       | >80        | Reprogramming |
| miPSC_21_L1 | T <sub>F</sub> | 4q       | 0        | TTTT/CA  | 17       | >150       | Reprogramming |
| miPSC_22_B2 | B2             | 6q       | NA       | TCTT/GA  | 15       | ~52        | Reprogramming |
| miPSC_23_B2 | B2             | 9q       | NA       | TTTT/AT  | 16       | ~50        | Mosaic        |
| miPSC_24_B2 | B2             | Xq       | NA       | TTTT/AA  | 15       | >100       | Reprogramming |
| miPSC_26_L1 | T <sub>F</sub> | 1q       | >3       | TCTT/AT  | 22       | ~58        | Reprogramming |
| miPSC_27_B2 | B2             | 11q      | NA       | TTTC/AA  | 14       | >60        | Reprogramming |
| miPSC_28_L1 | T <sub>F</sub> | 13q      | 3.6      | TCCT/AA  | 15       | ~93*       | Reprogramming |
| miPSC_29_L1 | T <sub>F</sub> | 15q      | 0        | TCTT/AA  | 16       | >80        | Reprogramming |
| miPSC_30_L1 | T <sub>F</sub> | 6q       | >3       | TCTT/AT  | 16       | ~72        | Reprogramming |
| miPSC_31_L1 | T <sub>F</sub> | 7q       | >3       | TTTG/AC  | 15       | ~43        | Reprogramming |
| miPSC_32_L1 | T <sub>F</sub> | Xq       | 2        | TCTT/AT  | 13       | ~37        | Reprogramming |
| miPSC_33_L1 | G <sub>F</sub> | Xq       | >3       | TTTT/AA  | 15       | ~47        | Reprogramming |
| miPSC_34_L1 | T <sub>F</sub> | 8q       | 0        | TCTT/AA  | 6        | ~36*       | Reprogramming |
| miPSC_35_L1 | T <sub>F</sub> | 1q       | 0        | TTTA/AA  | 15       | ~38        | Reprogramming |
| miPSC_36_L1 | G <sub>F</sub> | 8q       | 0        | ATGT/GA  | 6        | ~42        | Reprogramming |
| miPSC_37_L1 | T <sub>F</sub> | 1q       | 1.2      | TTTT/GT  | 14       | ~20        | Reprogramming |
| miPSC_38_L1 | T <sub>F</sub> | 10q      | 0        | TTCT/AA  | 15       | ~55        | Reprogramming |
| miPSC_39_L1 | T <sub>F</sub> | 10q      | 0        | TTTT/AA  | 8        | >140*      | Reprogramming |
| miPSC_40_L1 | T <sub>F</sub> | 11q      | >3       | TTTT/GA  | 14       | >120       | Reprogramming |
| miPSC_41_L1 | T <sub>F</sub> | 12q      | 2.6      | TCTT/GC  | 16       | ~49        | Reprogramming |
| miPSC_42_B1 | B1             | 14q      | NA       | TTCT/AA  | 15       | >50        | Reprogramming |
| miPSC_43_L1 | T <sub>F</sub> | 16q      | >3       | ATTT/AA  | 14       | ~42*       | Mosaic        |

Monomers: number of monomeric promoter units found for full-length L1 insertions. Cleavage: L1 endonuclease cleavage motif. TSD: target site duplication length. PolyA: polyA tract length estimated by Sanger sequencing. Insertions marked with an asterisk carry a 3' transduction. Note: miPSC\_1\_L1 – miPSC\_8\_L1 were detected in bulk miPSCs; the remaining insertions were detected in single-cell miPSC clones.

94 **Table 3**). To achieve even greater coverage of potentially active TEs, we performed mouse  
95 retrotransposon capture sequencing (mRC-seq), which uses sequence capture probes to enrich  
96 Illumina libraries for the 5' and 3' genomic junctions of mobile TEs, including T<sub>F</sub>, G<sub>F</sub> and A  
97 subfamily L1s, B1 and B2 SINEs, and IAP and ETn ERVs (**Supplementary Table 1**)<sup>28,60</sup>. The  
98 combination of WGS and mRC-seq identified an additional 4 putative *de novo* L1 G<sub>F</sub> and T<sub>F</sub>  
99 insertions (**Extended Data Fig. 3, Table 1 and Supplementary Table 3**).

100 We PCR amplified and fully characterized each putative L1 insertion sequence. Six events  
101 were full-length, retaining 2-7 monomers at their 5' end, and could only be amplified in the miPSC  
102 line where they were detected by genomic analysis (**Fig. 1b-d, Extended Data Fig. 2 and**  
103 **Extended Data Fig. 3**). An additional L1 (labeled miPSC\_6\_L1) was very heavily 5' truncated  
104 and confirmed by PCR to be private to one miPSC line (**Extended Data Fig. 3**). The final example  
105 (miPSC\_2\_L1) was heavily 5' truncated and inverted<sup>61</sup> and could be PCR amplified in 7/9 miPSC  
106 lines representing all 3 germ layers of animal A67 (**Fig. 1e and Extended Data Fig. 2**).  
107 miPSC\_2\_L1 most likely represented a mosaic insertion that arose early in the embryonic  
108 development of animal A67, as found previously<sup>28,30,62,63</sup>. Each insertion carried TSDs of 13-19nt,  
109 a long and pure 3' polyA tract, and integrated at a degenerate L1 endonuclease recognition motif  
110 (5'-TTTT/AA-3') (**Table 1**). These hallmarks were consistent with *bona fide* TPRT-mediated L1  
111 retrotransposition events<sup>16,19,64,65</sup>. In sum, 10/26 miPSC lines harbored at least one PCR validated  
112 *de novo* L1 insertion. Not counting the mosaic miPSC\_2\_L1 insertion, miPSCs from all 3 animals  
113 and 4/9 cell types, representing each germ layer, presented at least one *de novo* L1 insertion  
114 (**Supplementary Table 3**). Notably, down-sampling to 11× depth WGS, as per<sup>12</sup>, indicated an  
115 expected 95% probability of finding none of the validated *de novo* insertions (**Extended Data Fig.**  
116 **4a**).

117 Comprehensive capillary sequencing of the 3 full-length insertions (miPSC\_1\_L1,  
118 miPSC\_3\_L1 and miPSC\_4\_L1) revealed that each had intact ORFs (**Fig. 1b-d**). To assess the  
119 potential for further mobilization of these newly retrotransposed elements, we first used  
120 multiplexed L1 locus-specific bisulfite sequencing<sup>34,60</sup> to measure CpG methylation of their most  
121 5' promoter monomers (**Fig. 1e**). All 3 full-length elements were fully unmethylated in a subset of  
122 miPSCs, and their methylation decreased with distance from the L1 5' end (**Fig. 1g**). Next, we  
123 cloned and tested miPSC\_1\_L1 and miPSC\_4\_L1 in a cultured cell retrotransposition assay<sup>19,66</sup>,  
124 using the natural elements L1<sub>spa</sub> (T<sub>F</sub> subfamily)<sup>22</sup> and TG<sub>F</sub>21 (G<sub>F</sub> subfamily)<sup>21</sup> as positive controls,



125 as well as the highly mobile synthetic L1 T<sub>F</sub> element L1SM<sup>67</sup>. miPSC\_1\_L1 and miPSC\_4\_L1  
126 retrotransposed efficiently (**Fig. 1h**) when expressed from their native promoter or a  
127 cytomegalovirus promoter. Thus, endogenous L1 mobilization in miPSCs is driven by highly  
128 active donor L1s that can produce offspring L1s that are incompletely methylated and  
129 retrotransposition-competent.

130

### 131 **Single-cell miPSC clones reveal extensive L1-mediated endogenous retrotransposition**

132 Despite *de novo* L1 insertions being present in 10/26 miPSC lines, we were concerned that the  
133 heterogeneous mixture of cellular clones contained in bulk reprogrammed miPSCs could obscure  
134 TE insertions. We therefore reprogrammed MEFs from one of our C57BL/6×129S4Sv/Jae animals  
135 (labeled I222e2), isolated individual miPSCs via FACS, and expanded 18 clones cultivated in  
136 serum until p3, then in serum or 2i (naïve) culture conditions until p6 (**Extended Data Fig. 2a**).  
137 We then applied ~41× average genome-wide depth Illumina WGS and mRC-seq to miPSC single-  
138 cell clones 1-9, and mRC-seq only to clones 10-18, with each clone analyzed after culture in serum  
139 or 2i media (**Fig. 2a, Extended Data Fig. 1 and Supplementary Table 1**). Deep WGS was  
140 performed on the parental I222e2 MEF population, attaining cumulative 117× genome-wide depth,  
141 in addition to mRC-seq (**Supplementary Table 1**). Using the WGS data, we again called  
142 concordant SNVs and SVs private to one miPSC clone, while excluding known germline variants  
143 and those found in the parental MEFs. We found, on average, ~100 and ~1 private SNVs and SVs  
144 per miPSC clone, respectively, almost all of which were detected in both the serum and 2i  
145 conditions for each clone (**Supplementary Table 2**). These frequencies resembled those found by  
146 genomic analysis of bulk miPSCs, underlining that heterogeneous and homogeneous fibroblast-  
147 derived miPSC populations are relatively free of genomic abnormalities<sup>10,12</sup>. This experiment also  
148 indicated choice of serum or 2i media did not impact the frequency of SNVs or SVs present in  
149 miPSCs.

150 By contrast, TEBreak revealed 35 putative *de novo* TE insertions absent from the parental  
151 MEFs, all of which were found in both serum and 2i culture conditions for at least one miPSC  
152 clone. Of these, 27 were detected by both WGS and mRC-seq, 6 by mRC-seq only, and 2 by WGS  
153 only (**Supplementary Table 3**). We were able to PCR amplify 32 insertions in full and capillary  
154 sequence at least their 5' and 3' junctions (**Fig. 2b-f, Extended Data Fig. 3 and Supplementary**  
155 **Table 3**). Two other putative TE insertions could only be amplified at their 5' genome junction;

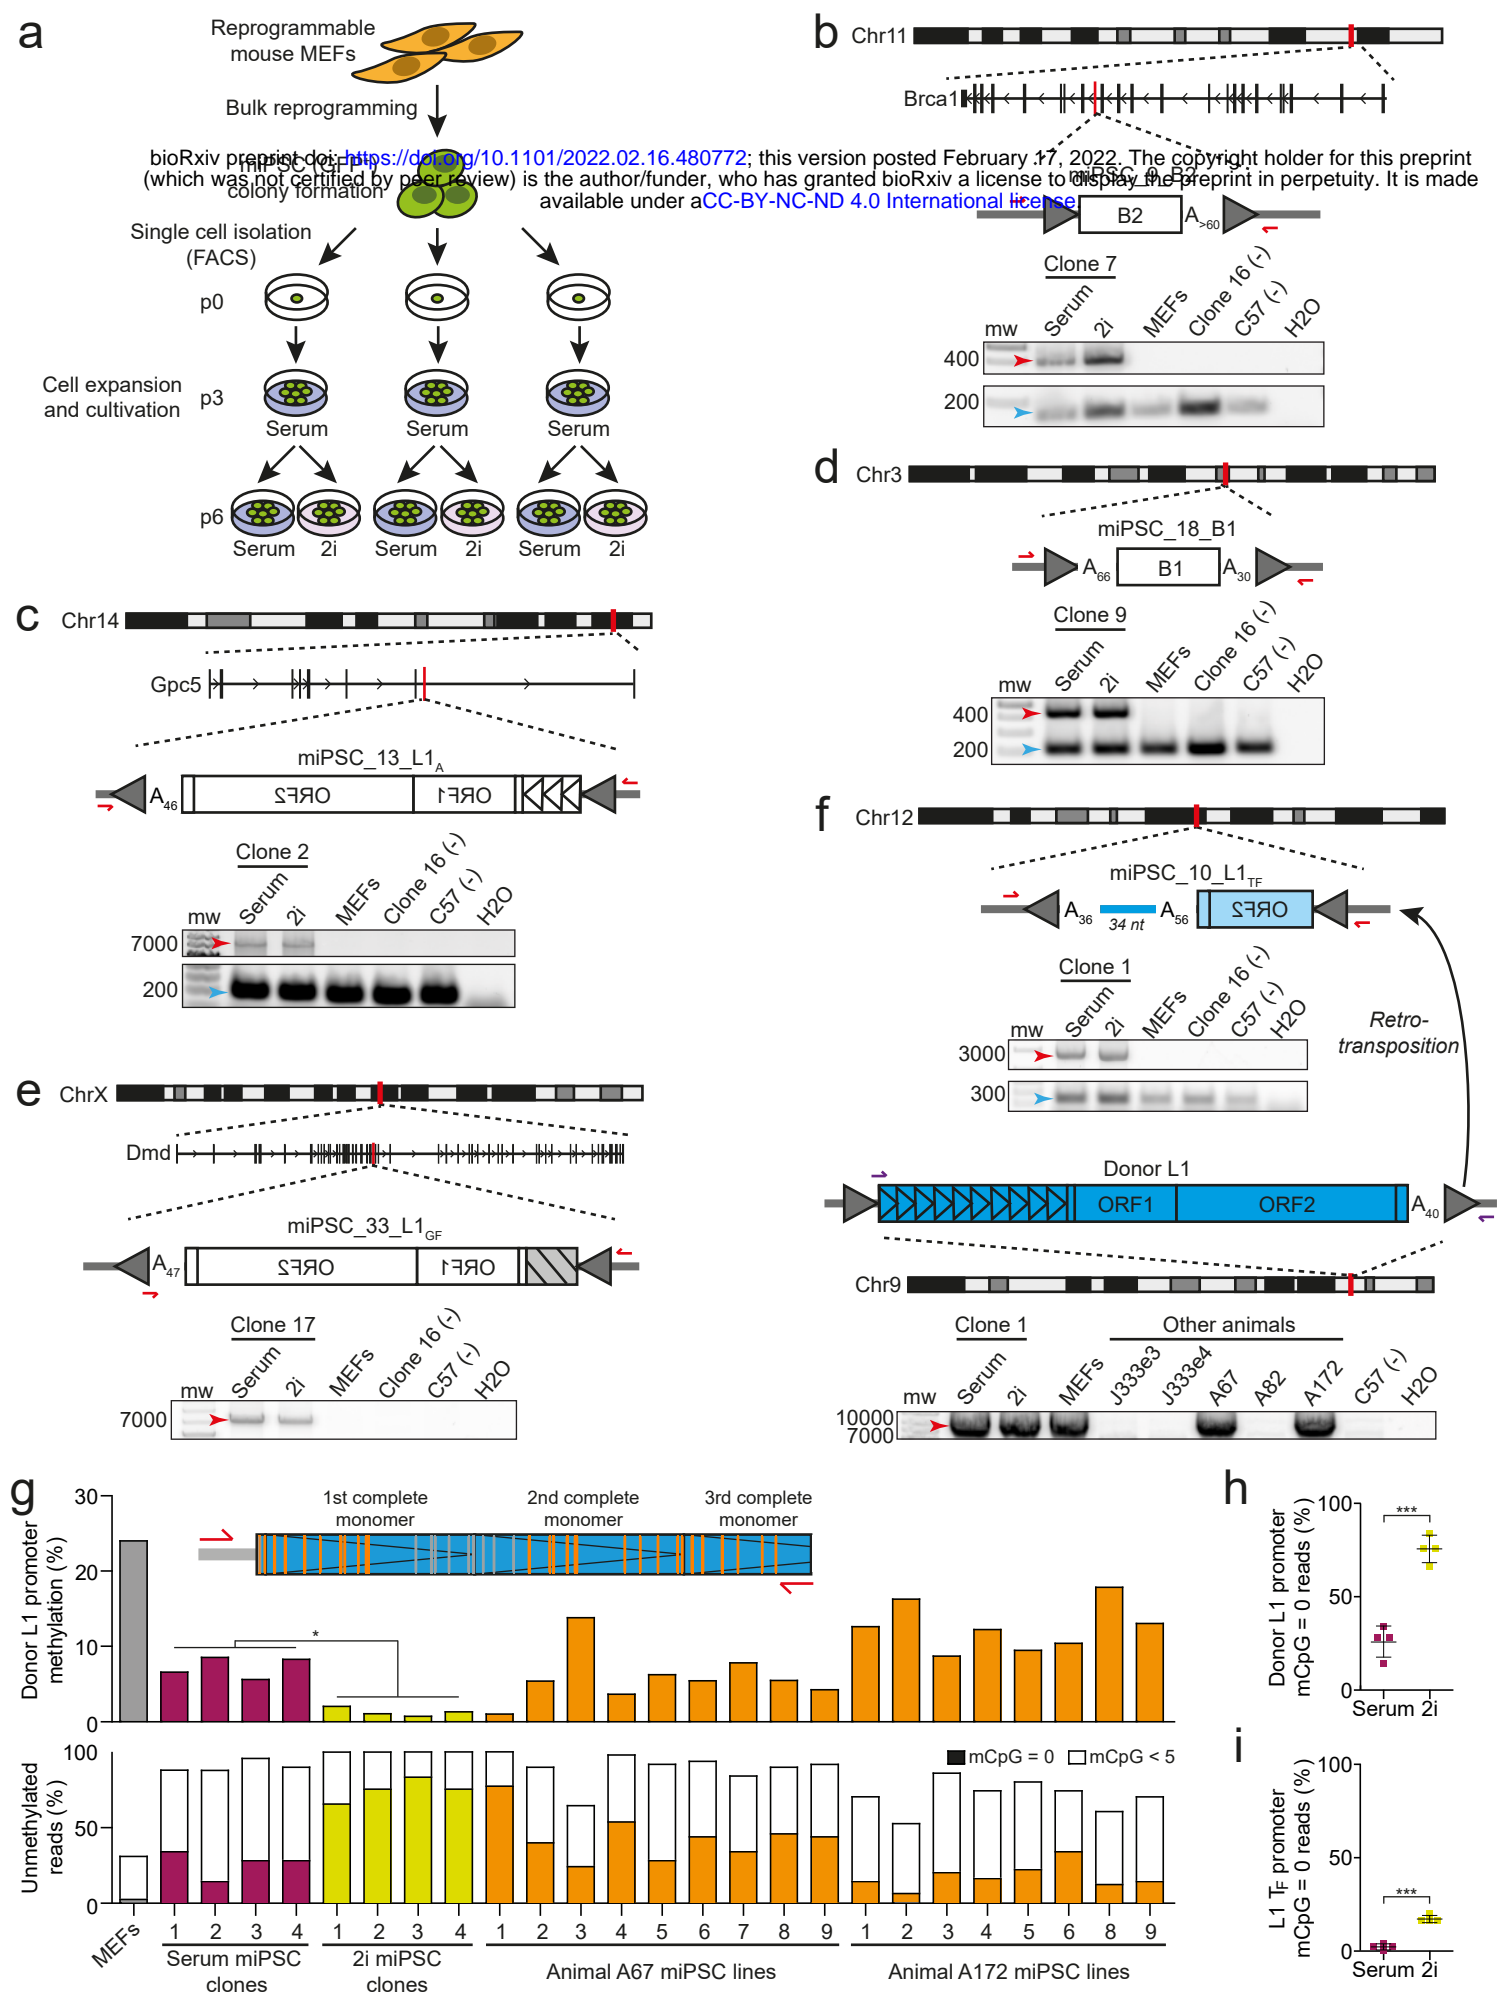

**Fig. 2: Frequent *de novo* TE insertions in MEF-derived clonally expanded miPSC lines.** **a**, Experimental design to generate single-cell miPSC clonal lines. Bulk MEFs from a *Col1a1-tetO-OKSM* mouse (animal I222e2) were purified and reprogrammed by addition of doxycycline. Individual *Oct4*-GFP positive miPSCs were then isolated via FACS, expanded in serum for 3 passages, and then cultured in serum or 2i-containing miPSC media for 3 additional passages. DNA was then extracted and analyzed by WGS and mRC-seq for 9 single-cell clones (four in serum and 5 in 2i conditions), with 9 other clones analyzed only with mRC-seq. **b**, A full-length *de novo* B2 inserted and orientated in antisense to intron 15 of *Brcal*. PolyA tract length is indicated immediately 3' of the B2. TSDs are depicted as grey arrows flanking the B2. PCR validation (gel pictures shown) involved an empty/filled PCR design where both primers (red arrows) are outside of the B2, generating "filled" B2 (red arrow) and "empty" wild-type (blue arrow) products. The B2 was amplified only in either the serum or 2i conditions for the single-cell clone (number 7) where the B2 was detected by genomic analysis, and not in the matched parental MEFs, the C57BL/6 strain, or a single-cell clone (number 16) selected at random. **c**, A full-length (3 monomers) L1 A subfamily element inserted *de novo* antisense to intron 7 of *Gpc5*. Sequence characteristics and PCR validation results are shown as in panel (b). Promoter monomers are shown as triangles within the L1 5'UTR. **d**, As in panel (b), except showing an unusual intergenic B1 insertion flanked by both 5' and 3' polyA tracts. **e**, A full-length L1  $G_F$  inserted *de novo* antisense to intron 60 of *Dmd*. PCR validation involved a 5' genomic primer and a 3' junction primer (red arrows). As indicated by a grey box with black stripes, the number of monomers is unknown but was >3. **f**, A heavily 5' truncated, intergenic *de novo* L1  $T_F$  insertion validated by empty/filled PCR, as per panel (b). Sequence features are annotated as per panel (b), with the addition of a 34nt 3' transduction matching a donor L1  $T_F$  located on Chromosome 9. PCR using primers (purple arrows) designed to amplify the entire donor L1 indicated it was polymorphic in our colony. Capillary sequencing indicated the donor L1 retained a promoter of 10 monomers and had intact ORFs. **g**, Locus-specific bisulfite sequencing analysis of the donor L1 promoter identified in panel (f), in MEFs, single-cell miPSC clones, and miPSC lines derived from primary cells. *top*: Assay design and primer locations. CpGs located in the first 3 monomers of the donor L1 were assessed. Orange and grey strokes indicate CpGs covered and not covered, respectively, by sequencing the amplicon with 2×300mer Illumina reads. *middle*: Mean percentages of donor L1 CpG methylation for 50 non-identical sequences selected at random from each sample. A two-tailed t test (\* $p < 0.05$ ) was used to compare serum and 2i culture conditions for single-cell miPSC clones 1-4. *bottom*: Percentages of fully unmethylated (mCpG=0, filled bars) and heavily unmethylated ( $0 < \text{mCpG} < 5$ , white bars) reads using the same sequencing data as displayed in the above histogram. **h**, Percentages of fully unmethylated (mCpG=0) reads corresponding to the donor L1 promoter identified in panel (f), for miPSCs cultured in serum or 2i conditions. Data represent mean methylation  $\pm$  SD observed for single-cell miPSC clones 1-4. Significance testing was via two-tailed t test (\*\* $p < 0.0001$ ). **i**, As for panel (h), except using an assay targeting the L1  $T_F$  subfamily monomer.

156 one of these (miPSC\_29\_L1) however also had strong 3' WGS and mRC-seq support. We therefore  
157 considered 33 TE insertions as validated *de novo* events (**Table 1** and **Supplementary Table 3**).  
158 Thirty-one of these were PCR validated as private to only one miPSC clone, whereas the remaining  
159 two events were found in either 2 clones (miPSC\_23\_B2) or 4 clones (miPSC\_43\_L1) (**Extended**  
160 **Data Fig. 3**). These last two insertions were therefore present in subclones of the parental MEF  
161 population.

162 The 33 fully characterized *de novo* insertions included 20, 3 and 1 T<sub>F</sub>, G<sub>F</sub> and A L1 subfamily  
163 members, respectively, as well as 2 B1 and 7 B2 elements (**Fig. 2b-f**). All insertions generated  
164 TSDs and a 3' polyA tract, and integrated at a degenerate L1 endonuclease motif (**Table 1**). 14/24  
165 L1 insertions retained at least one promoter monomer and were therefore considered full-length  
166 (**Table 1**). Of the remaining 10 L1s, 3 were 5' inverted (**Supplementary Table 3**). One unusual  
167 B1 insertion, miPSC\_18\_B1, was flanked by 5' and 3' polyA tracts as well as TSDs (**Fig. 2d**),  
168 likely arising via a variant of TPRT<sup>68</sup>. While no TE insertions were found in protein-coding exons,  
169 14 were intronic, including a B2 antisense to the tumor suppressor gene *Brca1* (**Fig. 2b**) and an L1  
170 G<sub>F</sub> antisense to the dystrophin gene *Dmd* (**Fig. 2e**). 15/18 miPSC clones (83.3%) harbored at least  
171 one fully characterized TE insertion, including all clones analyzed with both WGS and mRC-seq  
172 (**Supplementary Table 1**). Clone 2 contained the most (6) insertions. No *de novo* ERV insertions  
173 were found.

174 Among 277 high confidence heterozygous non-reference TE insertions (**Supplementary**  
175 **Table 4**) found in the parental MEF population, 97.0% were detected on average in each miPSC  
176 clone surveyed with WGS and mRC-seq. Down-sampling followed by seeking at least one WGS  
177 read in support of these non-reference insertions suggested our approach would distinguish  
178 approximately 50%, 95% and 99% of *de novo* TE insertions from pre-existing subclonal TE  
179 insertions present in 1%, 5% and 10% of cells, respectively (**Extended Data Fig. 4b**).  
180 Consistently, only 2/33 PCR validated TE insertions in the miPSC clones were subclonal in the  
181 parental MEFs (**Table 1, Extended Data Fig. 3**). An additional down-sampling analysis indicated  
182 *de novo* TE insertions were likely to be detected at a lower average WGS depth in the single-cell  
183 miPSC clones than insertions found in the bulk miPSC experiments (**Extended Data Fig. 4a**), in  
184 agreement with the greater homogeneity of the clonal miPSC cultivars. Deep sequencing of  
185 miPSCs and parental MEFs therefore enabled reliable detection and distinction of TE insertions  
186 arising before and during reprogramming.

187

## 188 **A polymorphic retrotransposition-competent L1 eludes methylation**

189 Six L1 insertions carried 3' transductions (**Table 1, Supplementary Table 3 and Extended Data**  
190 **Fig. 3**), flanking sequences generated when PolIII bypasses the native L1 polyA signal in favor of  
191 a downstream alternative<sup>69–73</sup>. Of these transductions, 5 were either too short to reliably map to the  
192 genome, or mapped to multiple locations (**Supplementary Table 3**). The remaining 34bp  
193 transduction accompanied a 5' truncated L1 T<sub>F</sub> insertion on Chromosome 12 (miPSC\_10\_L1) (**Fig.**  
194 **2f**). While the transduction aligned uniquely to Chromosome 9, a donor L1 was not present  
195 adjacent to this reference genome location. However, PCR amplification revealed an L1 T<sub>F</sub>  
196 immediately upstream of the transduced sequence (**Fig. 2f**). This donor L1 was polymorphic in  
197 our C57BL/6×129S4Sv/Jae animals and retained a 5' promoter comprising an unusually high  
198 number of monomers (10). Capillary sequencing confirmed the donor L1 possessed intact ORFs.  
199 L1 locus-specific bisulfite sequencing revealed that few (24.1%) of the CpG dinucleotides in the  
200 first two monomers of the donor L1 promoter were methylated in MEFs (**Fig. 2g and Extended**  
201 **Data Fig. 5**), as opposed to 7.3% in a subset of single-cell miPSC clones cultured in serum, and  
202 1.3% for the same miPSC clones when cultured in 2i conditions (**Fig. 2g**). This difference in CpG  
203 methylation between culture conditions was significant (p<0.05, two-tailed t test). The donor L1  
204 promoter was fully unmethylated in nearly all miPSCs cultured in 2i (**Fig. 2g and Extended Data**  
205 **Fig. 5**). Indeed, significantly more (p<0.0001, two-tailed t test) fully unmethylated sequences were  
206 found for the donor L1 promoter in 2i conditions than in serum, possibly as a consequence of  
207 global naïve state hypomethylation (**Fig. 2h**). Among the bulk reprogrammed miPSCs obtained  
208 from animals A67 and A172, which carried the donor L1 (**Fig. 2f**), only 9.1% of CpG dinucleotides  
209 were methylated in the donor L1 promoter, and fully unmethylated sequences were identified in  
210 all miPSC lines (**Fig. 2g and Extended Data Fig. 5**). By contrast, in MEFs, 83.6% of CpG  
211 dinucleotides in L1 T<sub>F</sub> promoter monomers genome-wide were methylated, compared to 45.2%  
212 among the A67 and A172 miPSC lines (**Extended Data Fig. 6**). L1 T<sub>F</sub> subfamily monomers were  
213 also significantly (p<0.001, two-tailed t test) less methylated in 2i (34.3%) miPSC conditions than  
214 serum (53.5%), leading to an increase in fully unmethylated monomers (**Fig. 2i and Extended**  
215 **Data Fig. 6**). These bisulfite sequencing analyses highlighted genome-wide and persistent  
216 relaxation of L1 T<sub>F</sub> methylation in miPSCs, leaving mobile L1 promoters completely  
217 unmethylated.

218

### 219 **Reprogramming is unaffected by L1 reverse transcriptase inhibition**

220 Lamivudine (3TC) is a potent nucleoside reverse transcriptase inhibitor known to limit engineered  
221 L1 retrotransposition without impacting telomerase or engineered ERV mobility<sup>74,75</sup>. In previous  
222 retrotransposition assays conducted in cultured HeLa cells, 3TC was tested at a maximum  
223 concentration of 25 $\mu$ M against the codon-optimized L1SM element, reducing its mobility by  
224 ~50%<sup>74</sup>. By performing titration experiments to optimize the use of 3TC during miPSC generation,  
225 we determined that 3TC concentrations of up to 100 $\mu$ M did not reduce MEF reprogramming  
226 efficiency (**Fig. 3a** and **Extended Data Fig. 7a**), or viability of cultured MEFs or miPSCs  
227 (**Extended Data Fig. 7b**). Using a wild-type L1 T<sub>F</sub> carrying an mCherry retrotransposition  
228 indicator cassette, we found 100 $\mu$ M 3TC reduced mouse L1 retrotransposition by ~95% in HeLa  
229 cells (**Fig. 3b**). These data indicated 3TC may be used, without apparent drawbacks, to limit L1-  
230 mediated mutagenesis arising during reprogramming and miPSC cultivation.

231

### 232 **Nanopore genomic analysis of TE insertions in bulk miPSCs**

233 In principle, a single long read can completely resolve a *de novo* TE insertion present in a  
234 heterogeneous cell population, as well as the accompanying TPRT hallmarks<sup>76</sup>. Long-read  
235 sequencing can also discover TE insertions in repetitive genomic regions refractory to mapping  
236 with short-read approaches<sup>35,77,78</sup>. We therefore applied Oxford Nanopore Technologies (ONT)  
237 PCR-free long-read sequencing (~20 $\times$  average genome-wide depth) to 4 bulk miPSC lines, 2 of  
238 which were reprogrammed in the presence of 100 $\mu$ M 3TC, as well as matched parental MEFs (**Fig.**  
239 **3a** and **Supplementary Table 1**). Applying the TLDR long-read TE analysis pipeline<sup>35</sup> to the  
240 ONT data, we identified 3,879 non-reference TE insertions carried by the parental MEFs  
241 (**Supplementary Table 4**). Of these, 3,380 (87.1%) corresponded to known insertions<sup>55</sup>. To gauge  
242 the general tractability of PCR validation applied to this dataset, we used a panel of 4 heterozygous  
243 non-reference TE insertions (**Supplementary Table 3**). All of these successfully amplified in the  
244 MEFs and miPSCs (**Extended Data Fig. 7c**).

245 An additional 16 TE insertions were each detected in only one miPSC line and not the  
246 parental MEFs or the remaining Illumina and ONT sequencing datasets, and were supported by at  
247 least one ONT read fully spanning the integrated TE sequence (**Supplementary Table 3**).  
248 Performing PCR validation of these insertions, we could amplify one in the parental MEFs

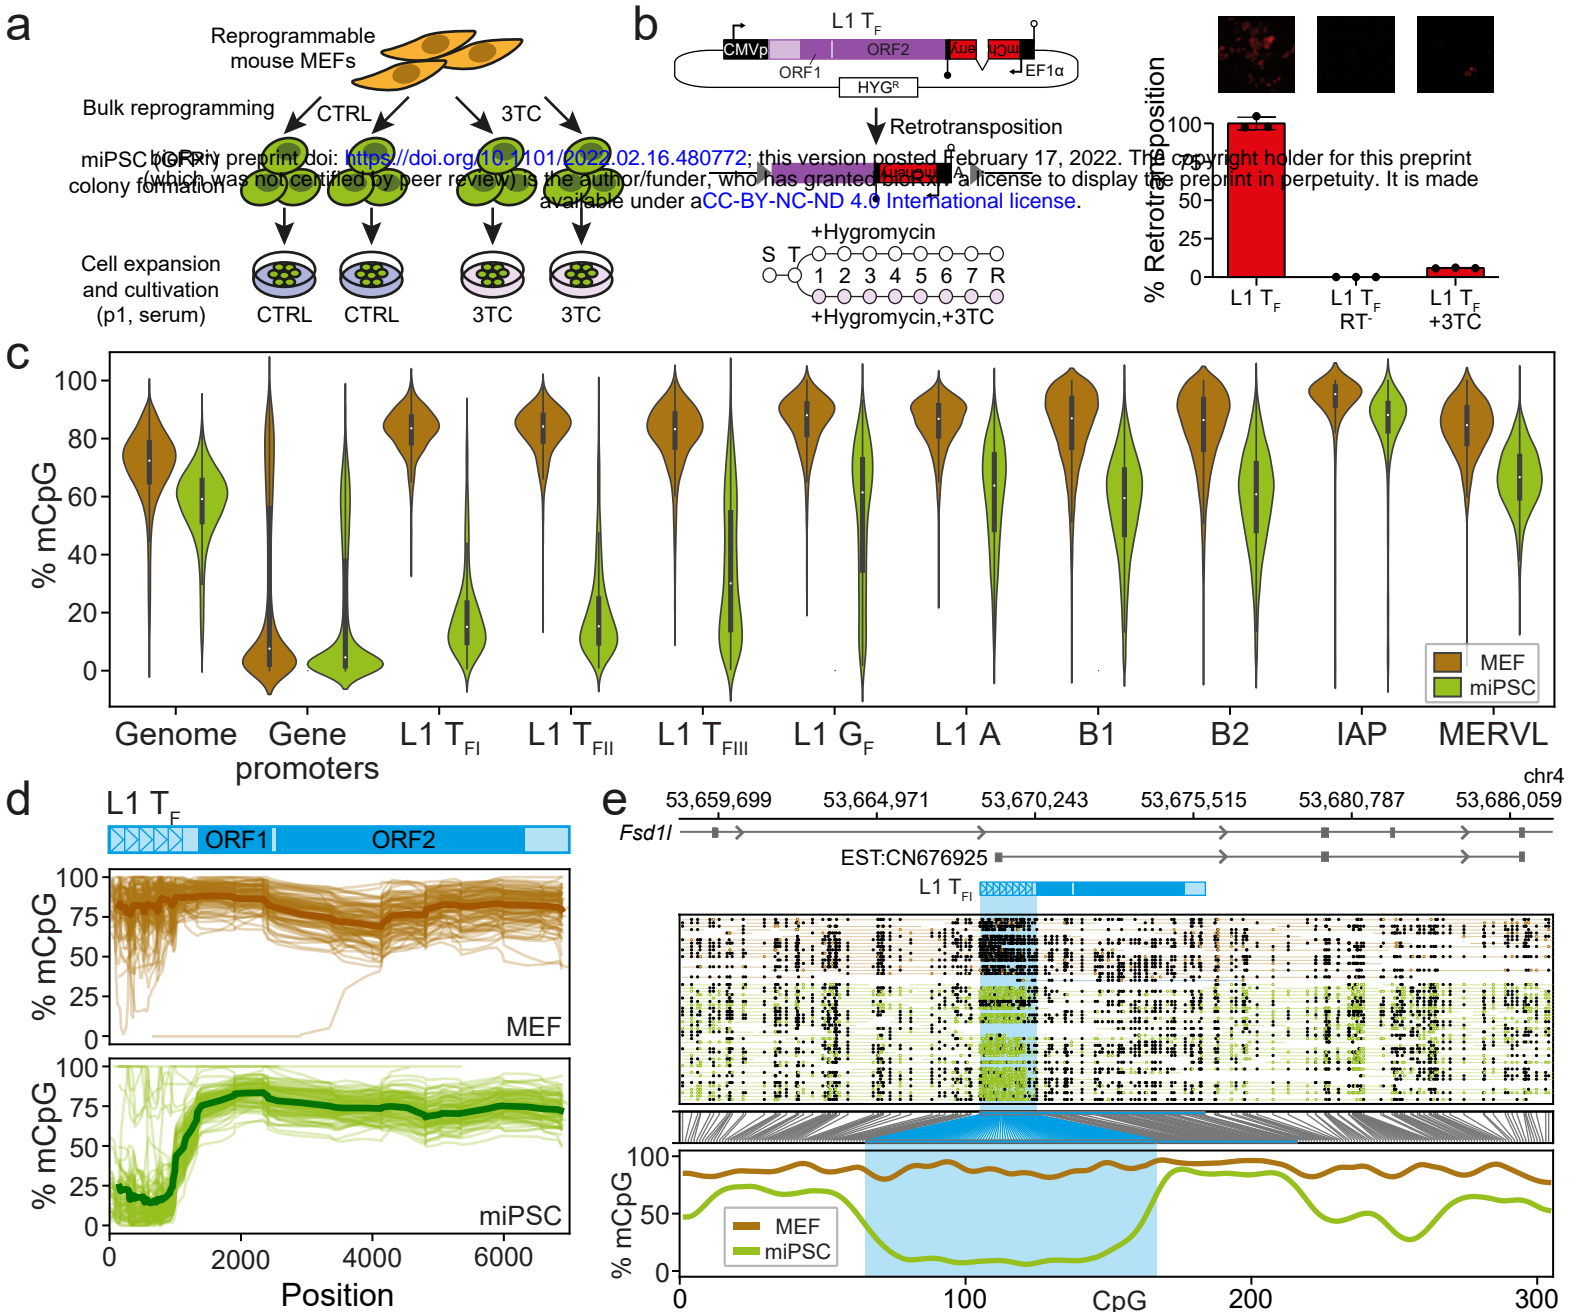

**Fig. 3: Long-read genomic analysis of TE methylation and mobilization in MEF-derived bulk miPSC lines.** **a**, Bulk MEFs were reprogrammed by the addition of doxycycline. *Oct4*-GFP positive miPSCs were then sorted and expanded in serum. Two miPSC lines were reprogrammed and cultured in media containing 100 $\mu$ M lamivudine (3TC), and two lines generated without lamivudine (CTRL). DNA was extracted from MEFs and miPSCs and ONT sequenced. **b**, *top left*: retrotransposition indicator plasmid L1\_mCherry consists of the pCEP4 backbone (CMV promoter, black; SV40 polyadenylation signal, open lollipop; hygromycin resistance gene, white) containing a wild-type L1 T<sub>F</sub> element (5'UTR, light purple; ORFs, dark purple). An mCherry reporter gene equipped with an EF1 $\alpha$  promoter and HSVtk polyadenylation signal (black lollipop) is inserted into the L1 3'UTR antisense to the L1. The mCherry sequence is interrupted by an intron in sense orientation relative to the L1, ensuring mCherry expression only upon retrotransposition. *bottom left*: retrotransposition assay timeline. Cells were split (S), transfected (T), and cultured in hygromycin-containing medium with and without 100 $\mu$ M 3TC. Retrotransposition efficiency was assessed by flow cytometry 8 days post-transfection (R). *top right*: fluorescence microscopy images showing representative wells at 8 days post-transfection with L1 T<sub>F</sub> (left), reverse transcriptase mutant (RT<sup>-</sup>) L1 T<sub>F</sub> (middle), and L1 T<sub>F</sub> treated with 100 $\mu$ M 3TC. *bottom right*: Retrotransposition efficiency assessed by flow cytometry, relative to L1 T<sub>F</sub>. Histogram depicts the mean and standard deviation of three independent biological replicates (black dots) consisting of three technical replicates each. **c**, CpG methylation ascertained by ONT sequencing of MEFs and a representative miPSC line untreated with lamivudine (CTRL 2). Results are shown for the whole genome (10kbp windows), the proximal promoters (-1000,+500) of protein-coding genes<sup>110</sup>, the 5'UTR of T<sub>F</sub>, G<sub>F</sub>, and A-type L1s >6kbp, B1 and B2 SINEs, and MERVL MT2 and IAP long terminal repeats. **d**, Composite L1 T<sub>F</sub> methylation profiles. Each graph displays 100 profiles. A schematic of the T<sub>F</sub> consensus is provided at top. Average values are indicated by more thickly colored lines. **e**, Methylation profile of the *Fsd11* locus obtained by ONT sequencing. The first panel shows an L1 T<sub>F</sub> orientated in sense to intron 6 of *Fsd11*, as well as an expressed sequence tag (EST) obtained from a mouse ESC sample and supporting a transcript initiated in the T<sub>F</sub> 5'UTR and spliced into a downstream *Fsd11* exon. The second panel displays ONT read alignments, with unmethylated CpGs colored in brown (MEF) and green (miPSC), methylated CpGs colored black, and CpGs not confidently called, i.e.  $\text{abs}(\log\text{-likelihood ratio}) > 2.5$ , omitted. The third panel indicates the relationship between CpG positions in genome space and CpG space, including those corresponding to the T<sub>F</sub> 5'UTR (shaded light blue). The fourth panel indicates the fraction of methylated CpGs. Note: this L1 T<sub>F</sub> is polymorphic in mouse strains<sup>55</sup>.

249 (Extended Data Fig. 7d) and one in the feeder MEFs, a potential experimental contaminant  
250 (Extended Data Fig. 7d). The remaining 14 putative *de novo* events comprised 3 L1 T<sub>F</sub>, 2 L1 G<sub>F</sub>,  
251 6 B2, and 3 ERV insertions. Although they could not be PCR amplified in any sample, all of the  
252 L1 and B2 insertions carried clear TPRT hallmarks (Supplementary Table 3). Each ERV  
253 incorporated two long terminal repeats flanking an internal proviral sequence and generated TSDs  
254 of the expected size (6bp)<sup>79,80</sup> (Supplementary Table 3). Although not statistically significant, we  
255 found fewer *de novo* L1-mediated insertions on average in the lamivudine treated miPSCs (~2)  
256 than the control miPSCs (~4), consistent with L1 inhibition by 3TC (Fig. 3b). Overall, ONT  
257 sequencing detected endogenous retrotransposition events in bulk miPSCs, providing results  
258 orthogonal and complementary to our short-read genomic analyses.

259

### 260 Genome-wide DNA demethylation during reprogramming focused on young L1 loci

261 A major feature of reprogramming mouse fibroblasts to a pluripotent state is globally reduced  
262 DNA methylation<sup>43,44,47</sup>. Although bisulfite sequencing can estimate the overall methylation of TE  
263 families, it can typically only resolve CpGs close to the termini of individual full-length L1 copies  
264 not located in highly repetitive regions. To generate a comprehensive genome-wide view of DNA  
265 methylation changes during reprogramming, and complement our bisulfite sequencing data, we  
266 analyzed the ONT data from MEFs and one of the matched miPSC lines not treated with 3TC,  
267 using Methylartist<sup>35,81</sup>. While methylation was reduced genome-wide, on protein-coding gene  
268 promoters (Extended Data Fig. 8a), and amongst all of the TE families considered (Extended  
269 Data Fig. 8b), the very youngest L1 subfamilies (T<sub>FI</sub> and T<sub>FII</sub>) displayed by far the greatest median  
270 methylation change (-68.7%) (Fig. 3c and Supplementary Table 5). 92.1% of full-length L1 T<sub>FI</sub>  
271 and T<sub>FII</sub> copies were significantly (p<0.01, Fisher's exact test with Bonferroni correction) less  
272 methylated in miPSCs (Supplementary Table 5), with this demethylation most pronounced in the  
273 monomeric L1 5'UTR (Fig. 3d). Thirty-six L1s initiated transcription of a spliced mRNA from  
274 their 5'UTR, as defined by GenBank expressed sequence tags, including alternative promoters for  
275 protein-coding genes expressed in pluripotent cells, such as *Fsd11* (Fig. 3e and Supplementary  
276 Table 5). We also identified full-length L1s demethylated in both MEFs and miPSCs (Extended  
277 Data Fig. 8c), in line with prior human data suggesting certain L1 loci evade DNA methylation in  
278 differentiated cells<sup>34,82</sup>. In sum, ONT analysis showed global reprogramming-associated  
279 demethylation is most accentuated for the youngest L1s, where retrotransposition potential is



280 concentrated, creating opportunities for L1-driven mobilization and protein-coding gene  
281 alternative promoters.

282

## 283 **Discussion**

284 This study demonstrates miPSCs incompletely silence mobile TE families and routinely harbor *de*  
285 *nov* TE insertions. While some TE insertions occur in parental cells and are inherited by miPSCs,  
286 our data suggest the majority arise during reprogramming or very early upon reaching  
287 pluripotency. In support of this view, firstly, we observed profound hypomethylation of young L1  
288 promoters in miPSCs and not parental cells. As shown elsewhere, L1 mRNA abundance is low in  
289 fibroblasts and increases greatly upon reprogramming<sup>45,46,51</sup>, while engineered L1 reporter genes  
290 retrotranspose >10-fold more frequently in hiPSCs and hESCs than in fibroblasts<sup>50,51</sup>. Secondly,  
291 38/41 *de novo* TE insertions detected by Illumina sequencing PCR validated in only one miPSC  
292 line each. These and the 14 putative *de novo* TE insertions identified by ONT sequencing were  
293 absent from all other samples in the study, as assayed by PCR and deep WGS. Finally, private  
294 SNVs (~100 per line) and SVs (~1 per line) were detected at similar frequencies in heterogeneous  
295 (bulk) and homogenous (single-cell clone) miPSC populations, whereas far more *de novo*  
296 retrotransposition events were found in the latter experiment. One explanation for this result is that  
297 a relatively small number of clones dominate bulk reprogramming experiments<sup>83</sup> and most SNVs  
298 and SVs predate reprogramming<sup>10,11,13</sup>, while retrotransposons mainly mobilize during  
299 reprogramming. This model is consistent with a prior WGS analysis that, alongside thousands of  
300 SNVs, identified no somatic L1 insertions among 10 human fibroblast clones generated from  
301 single cells<sup>84</sup>.

302 Previous experiments employing hiPSCs and mouse and human ESCs showed L1 de-  
303 reposition and mobilization were likely to take place in pluripotent cells<sup>34,41,42,45,46,49–51,85</sup>. Notably,  
304 23/35 (65.7%) *de novo* L1 insertions found here in miPSCs were full-length, a similar percentage  
305 to that observed previously in hiPSCs (57.1%)<sup>45</sup>. New full-length L1 insertions have potential for  
306 further retrotransposition and were largely unmethylated in miPSCs. Their CpG dinucleotides  
307 presented a “sloping shore” of methylation, as found elsewhere for newly retrotransposed CpG  
308 islands<sup>34,35,86</sup>, where methylation decreases from the L1 5' genome junction and forms a trough  
309 before sharply increasing over the L1 ORFs. Only one insertion corresponded to the L1 A  
310 subfamily, while the remainder were T<sub>F</sub> and G<sub>F</sub> elements, consistent with relative activity levels

311 revealed by sequencing extended mouse pedigrees and mouse tumors<sup>28,60</sup>. *De novo* SINE B1 and  
312 B2 insertions, mediated *in trans* by the L1 protein machinery<sup>87</sup>, were also detected in miPSCs, in  
313 line with L1-mediated *Alu* SINE insertions arising in hiPSCs and hESCs<sup>45,85,88</sup>. Discovery of *de*  
314 *novo* TE insertions in low-passage miPSCs derived from multiple parental cell types suggests  
315 endogenous retrotransposition may be an intrinsic risk of the epigenome remodeling required for  
316 the acquisition of pluripotency<sup>7,43–45,47</sup>. Retrotransposon insertions into protein-coding genes, such  
317 as *Brcal* and *Dmd*, could undermine miPSC models of human disease. Such mutations necessitate  
318 screening of miPSC lines<sup>4</sup>. However, strategies to minimize TE-mediated mutagenesis, including  
319 via the use of 3TC or another L1 reverse transcriptase inhibitor, appear achievable without  
320 affecting reprogramming efficiency, and therefore may be incorporated into future miPSC  
321 derivation protocols.

322

## 323 **Methods**

### 324 **Ethics statement**

325 All animal experimentation was performed under the auspices and approval of the Monash  
326 University Animal Research Platform Animal Ethics Committee (Approval Numbers MARP-  
327 2011-172-Polo, MARP-2011-171-BC-Polo, MARP-2017-151-BC-Polo, and ERM# 21634).

328

### 329 **Adult *Oct4*GFP-OKSM-M2rtTA mouse tissue somatic cell isolation and reprogramming**

330 Induced pluripotent stem cells were generated from adult and embryonic *Oct4*GFP-OKSM-  
331 M2rtTA doxycycline inducible reprogrammable mice<sup>52</sup>. These animals are heterozygous for an  
332 *Oct4*-GFP reporter and an OKSM cassette targeted to the *Collagen1a1* locus, and homozygous for  
333 the ROSA26-M2rtTA allele from the ubiquitous *ROSA26* locus. The polycistronic cassette is under  
334 the control of a tetracycline-dependent promoter (*tetOP*). Hence, upon the addition of doxycycline,  
335 M2rtTA binds to the *tetOP*, thereby inducing OKSM expression. *Oct4*GFP-OKSM-M2rtTA mice  
336 were housed at the Monash University Animal Research Platform animal facility.

337 Bone marrow extraction and FACS purification of granulocytes and hematopoietic stem  
338 (LSK) cells were performed as previously described<sup>89</sup>. In brief, harvested bone marrow cells were  
339 labeled using a two-step sequential antibody labeling procedure using the following primary  
340 conjugated antibodies: 1:200 dilution of Anti-Mouse CD5 FITC antibody (BD Biosciences, Cat#:  
341 553020), 1:100 dilution of Anti-Mouse B220 FITC antibody (BD Biosciences, Cat#: 557669),

342 1:200 dilution of Anti-Mouse TER-119 FITC antibody (BD Biosciences, Cat#: 557915), 1:400  
343 dilution of Anti-Mouse Sca-1 PB antibody (Biolegend, Cat#: E13-161.7), 1:200 dilution of Anti-  
344 Mouse cKit APC antibody (BD Biosciences, Cat#: 553356), 1:200 dilution of Anti-Mouse SSEA1  
345 Biotinylated antibody (Thermo Fisher Scientific, Cat#: 13-8813-80), 1:200 dilution of Anti-Mouse  
346 Gr-1 APC-Cy7 antibody (Biolegend, Cat#: 108423) and 1:1000 dilution of Anti-Mouse Mac1 PE  
347 antibody (Biolegend, Cat#: 101207). This was followed by the secondary labeling step with 1:200  
348 dilution of Streptavidin PE-Cy7 antibody (BD Biosciences, Cat#: 557598). Cells were isolated and  
349 sorted using an Influx Cell Sorter Instrument (BD Biosciences) with a 100µm nozzle. Samples  
350 were resuspended in phosphate buffered saline (PBS) supplemented with 2% fetal bovine serum  
351 (Thermo Fisher Scientific, Cat#: SH30071.03FBS, Hyclone). FACS sorting for these and the cell  
352 types below were performed with 2µg/mL Propidium Iodide (PI) (Sigma Aldrich, Cat#: P4864) in  
353 order to exclude non-viable cells. Granulocytes were isolated using the following cell surface  
354 marker profile: CD5<sup>-</sup>/B220<sup>-</sup>/Ter119<sup>-</sup>/Sca1<sup>-</sup>/cKit<sup>-</sup>/SSEA1<sup>-</sup>/Gr1<sup>+</sup>/Mac1<sup>+</sup>, whilst LSK cells were  
355 isolated from bone marrow using the following cell surface marker profile: CD5<sup>-</sup>/B220<sup>-</sup>/Ter119<sup>-</sup>  
356 /Sca1<sup>+</sup>/cKit<sup>+</sup>/SSEA1<sup>-</sup>/Gr1<sup>-</sup>/Mac1<sup>-</sup>.

357 Fibroblasts were isolated from both ear lobes from each mouse. Tissue pieces were  
358 resuspended in 0.25% Trypsin-EDTA (Thermo Fisher Scientific, Cat#: 25200-072) solution, and  
359 after 5min incubation at room temperature, were mechanically minced using two surgical blades  
360 for a further 2min. iPSC medium was used to inactivate trypsin, and dissociated pieces were  
361 transferred to a 15mL centrifuge tube (Corning). Tissue pieces were then transferred to a gelatin  
362 coated T-75 flask (Corning) and cells were left to grow for a further 7 days. CD45<sup>-</sup>/CD31<sup>-</sup>  
363 /Thy1.2<sup>hi</sup> fibroblasts were fractionated by FACs using the following antibodies: a 1:100 dilution  
364 of Anti-Mouse CD31 antibody conjugated to FITC (Thermo Fisher Scientific, Cat#: 11-0311-81),  
365 a 1:100 dilution of Anti-Mouse CD45 antibody conjugated to FITC (Thermo Fisher Scientific,  
366 Cat#: 11-0451-810) and a 1:400 dilution of Anti-Mouse Thy-1.2 antibody conjugated to APC  
367 (Thermo Fisher Scientific, Cat#: 17-0902-81).

368 Liver epithelial cells were isolated according to an adaptation of a previously described  
369 method<sup>90</sup>. Briefly, 3mg/mL Collagenase Type 1 (Sigma-Aldrich, Cat#: C1639) solution was  
370 prepared in sterile PBS. Whole liver was transferred into a sterile 6cm petri dish and finely minced  
371 using fine dissecting scissors. Minced liver pieces were transferred to 15mL tube with preheated  
372 Collagenase Type 1 (Sigma, Cat#: C1639). Tubes were left to agitate on a Thermomix (Eppendorf)

373 at 750rpm, 37°C for 15min. Following digestion, the tube was removed and the cellular suspension  
374 was triturated with an 18G needle, until tissue chunks were mostly dissociated. Sample tubes were  
375 then left to agitate for an additional 15min, until liver fragments were completely digested. The  
376 sample suspension was again triturated, with a 21G needle, to generate a single cell suspension,  
377 and then processed through a 40µm cell strainer into a clean 50mL centrifuge tube (Corning). After  
378 rinsing in 2% FCS/PBS (wash buffer) and centrifuging for 5min at 1380rpm for 4°C, the  
379 supernatant was removed and cells were resuspended in wash buffer and centrifuged once again.  
380 Cells were counted and  $5 \times 10^6$  cells were resuspended for sorting. Cells were labeled with primary  
381 antibodies using a 1:100 dilution of Anti-mouse CD31 antibody conjugated to FITC (Thermo  
382 Fisher Scientific, Cat#: 11-0311-81), followed by a 1:100 dilution of Anti-mouse CD45 antibody  
383 conjugated to FITC (Thermo Fisher Scientific, Cat#: 11-0451-81) and 1:100 dilution of Anti-  
384 mouse EpCAM antibody conjugated to eFluor450 (Thermo Fisher Scientific, Cat#: 48-5791-82).  
385 Liver epithelial cells were isolated using the following cell surface marker profile: CD45<sup>-</sup>/CD31<sup>-</sup>  
386 /EpCAM<sup>hi</sup>.

387 Thymus tissue was processed for thymic epithelial cell isolation as previously described<sup>91</sup>.  
388 Cells were labeled with the following antibodies: 1:400 dilution of Anti-mouse CD45 antibody  
389 conjugated to APC-Cy7 (BD Biosciences, Cat#: 557659), 1:200 dilution of Anti-mouse TER-119  
390 antibody conjugated to APC-Cy7 (BD Biosciences, Cat#: 560509), 1:6000 dilution of Anti-mouse  
391 MHC Class II antibody conjugated to PB (Biolegend, Cat#: 107620) and 1:1000 dilution of Anti-  
392 mouse EpCAM antibody conjugated to APC (Biolegend, Cat#: 118214). Thymic epithelial cells  
393 were sorted according to the following cell surface marker profile: CD45<sup>-</sup>/Ter119<sup>-</sup>/MHC Class  
394 II<sup>+</sup>/EpCAM<sup>+</sup>.

395 Intestinal stem cells were purified as previously described<sup>92</sup>. Cells were labeled with a  
396 1:200 dilution of Anti-mouse CD45 antibody conjugated to BV510 (BD Biosciences, Cat#: 563891),  
397 1:200 dilution of Anti-mouse CD31 antibody conjugated to BV510 (BD Biosciences,  
398 Cat#: 563089), a 1:100 dilution of Anti-mouse CD24 antibody conjugated to Pe-Cy7 (Thermo  
399 Fisher Scientific, Cat#: 25-0242-82), a 1:100 dilution of Anti-mouse EpCAM antibody conjugated  
400 to eFluor450 (Thermo Fisher Scientific, Cat#: 48-5791-82), and 1:100 Anti-EphrinB2  
401 unconjugated antibody (BD Biosciences, Cat#: 743763). In the secondary labeling step, a 1:200  
402 dilution of Anti-mouse Alexa Fluor 555 polyclonal antibody (Thermo Fisher Scientific, Cat#: A-

403 31570) was used to detect the EphrinB2 antibody. Intestinal stem cells were fractionated according  
404 to the following cell surface marker profile: CD45<sup>-</sup>/CD31<sup>-</sup>/CD24<sup>+</sup>/EpCAM<sup>+</sup>/Ephrin<sup>+</sup>.

405 To obtain astrocytes, brain tissue was processed using a MACS Neural Tissue Dissociation  
406 Kit (T) (Miltenyi Biotec, Cat#: 130-093-231) and manually dissected according to manufacturer's  
407 instructions. Cells were then collected and incubated with antibodies directed against Glast1  
408 (Allophycocyanin-conjugated, ACSA-1, 1:10 dilution) (Miltenyi Biotec, Cat#: 130-098-803),  
409 1:100 dilution of Anti-mouse CD133 antibody conjugated to PE (Thermo Fisher Scientific, Cat#:  
410 12-1331-80), 1:200 dilution of Anti-mouse CD45 antibody conjugated to PE-Cy7 (BD  
411 Biosciences, Cat#: 552848) and 1:200 dilution of Anti-mouse CD31 antibody conjugated to PE-  
412 Cy7 (Thermo Fisher Scientific, Cat#: 25-0311-82). Astrocytes were sorted and purified according  
413 to the following cell surface marker profile: CD45<sup>-</sup>/CD31<sup>-</sup>/CD133<sup>-</sup>/GLAST1<sup>+</sup>.

414 Keratinocytes and bulge stem cells were isolated from epidermis as previously described<sup>93</sup>.  
415 Cells were collected and incubated with antibodies against Anti-Mouse Integrin alpha 6 antibody  
416 (GoH3) conjugated to PE (1:600) (Abcam, Cat#: ab95703), a 1:200 CD104 antibody conjugated  
417 to FITC (Biolegend, Cat#: 346-11A) and a 1:100 dilution of Anti-mouse CD34 biotinylated  
418 antibody (Thermo Fisher Scientific, Cat#: 13-0341-85) for 20min at 4°C. For secondary antibody  
419 labeling, cells were incubated with 1:200 APC-Streptavidin antibody (Biolegend, Cat#: 405207)  
420 to detect CD34 biotinylated antibody for 20min at 4°C. They were then washed and resuspended  
421 in PI (2µg/mL) 1% BSA/PBS (Sigma-Aldrich, Cat#: A8412) and passed through a 40µm cell  
422 strainer (BD Falcon) to produce single cell suspensions. Cells with the surface marker profile of  
423 CD104<sup>+</sup>/CD34<sup>+</sup>/α6-integrin<sup>+</sup> were defined as bulge stem cells, and those marked as α6-integrin<sup>-</sup>  
424 /CD34<sup>+</sup> were defined as keratinocytes.

425 Reprogramming of the above 9 primary cell types was performed as follows: cells were  
426 seeded into gelatinized tissue culture treated 6-well plates (Corning Costar, Cat#: CLS3506) and  
427 cultured at 37°C and 5% CO<sub>2</sub> in iPSC media containing KnockOut DMEM (Thermo Fisher  
428 Scientific, Cat#: 10829-018), 15% Fetal Bovine Serum (FBS) (Thermo Fisher Scientific, Cat#:  
429 SH30071.03), GlutaMAX Supplement (Thermo Fisher Scientific, Cat#: 35050061), Penicillin-  
430 Streptomycin (Thermo Fisher Scientific, Cat#: 15070063), MEM Non-Essential Amino Acids  
431 Solution (Thermo Fisher Scientific, Cat#: 11140050), 2-Mercaptoethanol (Thermo Fisher  
432 Scientific, Cat#: 21985023) and 1000U/mL Leukemia Inhibitory Factor (LIF) (Merck Millipore,  
433 Cat#: ESG1107), supplemented with 2µg/mL of doxycycline (dox) (Sigma-Aldrich, Cat#: 33429-

434 100MG-R). iPSC medium supplemented with dox was replaced every alternate day after the first  
435 3 days of reprogramming and withdrawn 4 days after the presence of iPSC-like colonies had  
436 formed, with typical dome-shaped iPSC morphology. Cells were then cultured to confluency on a  
437 layer of irradiated MEFs prior to further FACs purification and enrichment for Oct-GFP<sup>+</sup> cells.  
438 Purified *Oct4*-GFP iPSCs were then bulk expanded in 175cm<sup>2</sup> cell culture flasks (Corning, Cat#:  
439 CLS430825) and then frozen at a density of 1×10<sup>6</sup> cells/vial.

440

#### 441 **Mouse embryonic fibroblast isolation and reprogramming**

442 Reprogrammable mouse embryonic fibroblast (MEF) cultures were derived as described  
443 previously<sup>94</sup> from a E13.5dpc *Oct4*GFP-OKSM-M2rtTA embryo (animal I222e2) and cultivated  
444 at 37°C, 5% O<sub>2</sub>, 5% CO<sub>2</sub> in MEF medium containing DMEM High Glucose (Thermo Fisher  
445 Scientific, Cat# 11960-044) with 10% FBS (Thermo Fisher Scientific, Cat#: SH30071.03), 1mM  
446 Sodium Pyruvate (Thermo Fisher Scientific, Cat#: 11360-070), GlutaMAX Supplement (Thermo  
447 Fisher Scientific, Cat#: 35050061), Penicillin-Streptomycin (Thermo Fisher Scientific, Cat#:  
448 15070063), MEM Non-Essential Amino Acids Solution (Thermo Fisher Scientific, Cat#:  
449 11140050) and 2-Mercaptoethanol (Thermo Fisher Scientific, Cat#: 21985023). MEFs were  
450 reprogrammed by being placed in iPSC medium supplemented with 2µg/mL dox (Sigma-Aldrich,  
451 Cat#: 33429-100MG-R) and cultured on irradiated MEFs at 37°C, 5% CO<sub>2</sub>. iPSC colonies were  
452 discerned according to GFP expression in the absence of dox. In addition to bulk iPSC cultures  
453 (see below), single *Oct4*-GFP<sup>+</sup> cells were deposited via FACS individually into 96-well pre-  
454 gelatinized tissue culture plates (Falcon, Cat#: 353072). Eighteen single-cell clones were bulk  
455 expanded on 6-well pre-gelatinized tissue culture plates (Falcon, Cat#: 353046) and maintained in  
456 serum or 2i conditions (see below).

457

#### 458 ***Oct4*-GFP<sup>+</sup> iPSC flow cytometry**

459 For flow cytometry, cells were harvested by dissociating in 0.25% Trypsin EDTA (Life  
460 Technologies) to yield a single cell suspension, and then resuspended in FACS wash (Phosphate  
461 Buffered Saline with 2% Fetal Calf Serum) containing PI. Live cells were gated on the basis of  
462 forward scatter, side scatter and PI exclusion. Flow cytometric gates were set using control iPSCs  
463 that did not have endogenous GFP expression. Tubes were sorted according to GFP expression  
464 using an Influx Cell Sorter Instrument (Becton Dickinson). Data collected were analyzed and

465 presented using FlowJo software. Sorted GFP<sup>+</sup> cells were then plated down on T-25 flasks  
466 (Corning) and expanded onto T-150 flasks (Corning), before being frozen down at a density of  
467  $1 \times 10^6$  cells/vial.

468

### 469 **Serum and serum-free iPSC culture**

470 Mouse iPSCs were maintained on irradiated primary MEFs, as previously described<sup>8,95</sup>. Briefly,  
471 iPSCs were cultured on 0.2% Porcine Gelatin (Sigma-Aldrich, Cat#: G1890-500G) coated tissue  
472 culture plates and flasks (Corning) on a feeder layer of irradiated MEFs ( $2 \times 10^4$  cells/cm<sup>2</sup>). iPSC  
473 medium was changed daily and cells were cultured at 37°C and 5% CO<sub>2</sub>. Passaging was performed  
474 when iPSCs reached 70% confluency. Alternatively, iPSCs were cultured on irradiated MEFs in  
475 serum-free media containing knockout serum replacement (KOSR) and 2i/LIF<sup>96</sup>. Here, cells were  
476 cultured in DMEM (Thermo Fisher Scientific, Cat#: 11960-044), 1000U/mL LIF (Merck  
477 Millipore, Cat#: ESG1107), 0.1mM 2-Mercaptoethanol (Thermo Fisher Scientific, Cat#:  
478 21985023), 1mM GlutaMAX Supplement (Thermo Fisher Scientific, Cat#: 35050061), 1%  
479 Sodium Pyruvate (Thermo Fisher Scientific, Cat#: 11360-070), 0.1mM MEM Non-Essential  
480 Amino Acids Solution (Thermo Fisher Scientific, Cat#: 11140050), 1% Penicillin-Streptomycin  
481 (Thermo Fisher Scientific, Cat#: 15070063), with medium supplemented with 15% KOSR  
482 (Thermo Fisher Scientific, Cat#: 10828-028), 1µm Mek1/2 Inhibitor (PD0325901) (Tocris, Cat#:  
483 4192) and 3µm GSK3a/b inhibitor (CHIR99021) (Tocris, Cat#: 4423). Prior to genomic DNA  
484 extraction, iPSCs depleted from irradiated feeders were dissociated with 0.5% Trypsin EDTA  
485 (Thermo Fisher Scientific, Cat#: 25200-072). The irradiated MEFs were feeder depleted with  
486 10mL of iPSC media for 45min in non-gelatinized T-25 flasks (Corning, Cat#: CLS3056). The  
487 resultant iPSCs were collected as a supernatant in suspension medium.

488

### 489 **Lamivudine titration experiments**

490 iPSCs were cultured with primary irradiated MEFs, as above, for 9 days in concentrations of  
491 lamivudine (3TC, Sigma-Aldrich, Cat#: L1295-10MG) ranging from 0 to 200µM and cell survival  
492 calculated as a % of the starting population. Reprogrammable OKSM, rtTA3 MEFs were isolated  
493 from embryonic day 13.5 embryos from *Oct4*-GFP;ROSA-rtTA-out;OKSM-72 mice as previously  
494 described<sup>44,97</sup>. Doxycycline inducible reprogrammable MEFs were grown in media containing  
495 2µg/mL dox (Sigma Aldrich Cat#: 33429-100MG-R) and 0-200µM 3TC for 15 days, with the

496 percentage cell survival calculated at days 3, 7, 10 and 15. Once 100 $\mu$ M was identified as the  
497 optimal concentration of 3TC to assess its impact on L1 retrotransposition, 30,000  
498 reprogrammable MEFs at passage 2 were seeded onto gelatinized 6-well plates and reprogrammed  
499 in dox for 12 days, then cultured for an additional 4 days without dox. *Oct4*-GFP<sup>+</sup> iPSCs were then  
500 purified via flow cytometric sorting and expanded on irradiated MEFs for an additional 11 days,  
501 then feeder depleted prior to DNA extraction. Reprogramming and iPSC media contained serum,  
502 and either 100 $\mu$ M 3TC or no 3TC.

503

#### 504 **Illumina sequencing and genomic analysis**

505 Genomic DNA was harvested from MEFs and iPSCs using a DNeasy Blood and Tissue Kit  
506 (Qiagen, Cat#: 60594). DNA was quantified by a Qubit dsDNA HS Assay Kit (Life Technologies,  
507 Cat#: Q32851) on a Qubit Fluorometer 3.0 (Life Technologies). For WGS, libraries were  
508 generated using an Illumina TruSeq DNA PCR-free kit (Illumina, Cat#: 20015962) and sequenced  
509 separately on an Illumina HiSeq X Ten platform (Macrogen, Korea).

510 For mRC-seq, libraries were prepared as follows: 1 $\mu$ g genomic DNA was sheared using a  
511 Covaris M220 Focused Ultrasonicator in a 130 $\mu$ L microTUBE AFA fiber snap-cap vial (Covaris,  
512 Cat#: 520045). The following parameters were used to gain 500bp insert libraries: 50W, duty  
513 factor 20%, 200 cycles per burst, duration 55s. Size selection to remove fragments <300 bp was  
514 performed using Agencourt AMPure XP beads (Beckman Coulter, Cat#: A63881) with a 1:0.6  
515 DNA:beads ratio. Libraries were then generated by TruSeq Nano DNA LT kit (Illumina, Cat#:  
516 20015964) using TruSeq DNA Single Indexes (Illumina, Cat#: 20015960 and 20015961) and run  
517 on a 2% agarose gel (Bioline, Cat#: BIO-41025) pre-stained with SYBR Safe Nucleic Acid Gel  
518 Stain (Invitrogen, Cat#: S33102). For ~500bp insert size libraries the target gel fragment size was  
519 600-650bp, which was excised under a Safe Imager 2.0 Blue-Light Transilluminator (Invitrogen).  
520 DNA was purified using a MinElute Gel Extraction Kit (Qiagen, Cat#: 28606) according to the  
521 manufacturer's instructions. DNA was eluted in 25 $\mu$ L molecular grade water. Enrichment of DNA  
522 fragments was performed as described for Illumina TruSeq Nano DNA LT Kit (Illumina, Cat#:  
523 20015964). Sample clean up was performed with Agencourt AMPure XP beads (Beckman  
524 Coulter, Cat#: A63881) using a 1:1.1 ratio of DNA to beads. Amplified libraries were eluted in  
525 30 $\mu$ L molecular grade water and quantified using a Bioanalyzer DNA 1000 chip (Agilent  
526 Technologies, Cat#: 5067-1504).



527 mRC-seq hybridization was performed as previously described<sup>28</sup>. Hybridization reactions  
528 were washed using SeqCap Hybridization and Wash Kit (Roche, Cat#: 05634261001) and DNA  
529 eluted in 50µL molecular grade water. Two post-hybridization LM-PCR reactions per sample were  
530 performed using 20µL Enhanced PCR Mix, 5µL PCR Primer Cocktail from the Illumina TruSeq  
531 Nano DNA LT Kit (Illumina, Cat#: 20015964) and 25µL sample. PCR was performed with the  
532 following cycling conditions: 95°C for 3min, 8 cycles of 98°C for 20s, 60°C for 15s, and 72°C for  
533 30s, followed by 72°C for 5min. The two PCR reactions for each sample were pooled and cleaned  
534 up using the QIAquick PCR Purification Kit (Qiagen) and samples eluted in 15µL Elution Buffer  
535 (Qiagen, Cat#: 28706). Quantity and fragment size were determined using a Bioanalyzer DNA  
536 1000 chip (Agilent Technologies, Cat#: 5067-1504). Libraries were pooled and sequenced on an  
537 Illumina HiSeq X Ten platform (Macrogen, Korea).

538 Reads were aligned to the mm10 reference genome using bwa-mem<sup>98</sup> version 0.7.12 with  
539 parameters -M -Y. Duplicate reads were marked via Picard MarkDuplicates version 1.128. Indel  
540 Realignment was carried out via GATK IndelRealigner (3.7). SNVs were called by GATK  
541 HaplotypeCaller 3.7<sup>53</sup> to generate GVCFs and GenotypeGVCFs to obtain cohort-level calls. SNVs  
542 were also called using freebayes<sup>54</sup> filtered to remove known mouse strain germline variants<sup>55</sup>. SVs  
543 were called using Delly2 and GRIDSS 2.0.0<sup>56,57</sup>, using calls with concordant non-filtered precise  
544 breakends. Variant impact prediction and annotation was carried out using SnpEff version 4.3T<sup>99</sup>.  
545 WGS and mRC-seq aligned BAMs were processed to identify non-reference TE insertions using  
546 TEBreak (<https://github.com/adamewing/tebreak>) as previously described<sup>60</sup>.

547

#### 548 **TE insertion PCR validation experiments**

549 Reads supporting putative *de novo* TE insertions were manually examined using Serial Cloner  
550 ([http://serialbasics.free.fr/Serial\\_Cloner.html](http://serialbasics.free.fr/Serial_Cloner.html)), the UCSC Genome Browser BLAT tool<sup>100</sup> and the  
551 Rebase CENSOR tool<sup>101</sup>. PCR primers were designed with Primer3<sup>102</sup> against TE insertion  
552 sequences and their 5' and 3' genomic flanks (**Supplementary Table 3**). Empty/filled PCRs  
553 (combining 5' and 3' flanking primers) and full-length PCRs (using junction-spanning primers)  
554 were performed using an Expand Long Range dNTPack (Roche, Cat#: 4829034001). Reaction  
555 mixes contained 5µL 5× Expand Long Range Buffer with 12.5mM MgCl<sub>2</sub>, 1.25µL dNTP Mix  
556 (dATP, dCTP, dGTP, dTTP at 10mM each), 1.25µL DMSO (100%), 1µL primer mix (25µM of  
557 each primer), 0.35µL Expand Long Range Enzyme Mix (5U/µL), 4-10ng genomic DNA template,

558 and molecular grade water up to a total volume of 25 $\mu$ L. PCR was performed with the following  
559 cycling conditions: 92°C for 3min, 10 cycles of 92°C for 30s, 56-60°C for 30s, and 68°C for 7min  
560 30s 25 cycles of 92°C for 30s, 56-60°C for 30s, and 68°C for 7min + 20s cycle elongation for each  
561 successive cycle, followed by 68°C for 10min. TE-genome junction validation PCRs were  
562 performed using MyTaq HS DNA Polymerase (Bioline, Cat#: BIO-2111). Reaction mixes  
563 contained 5 $\mu$ L 5 $\times$  MyTaq Reaction Buffer, 0.5 $\mu$ L primer mix (25 $\mu$ M of each primer), 0.2 $\mu$ L  
564 MyTaq HS DNA Polymerase, 2-4ng genomic DNA template, and molecular grade water up to a  
565 total volume of 25 $\mu$ L. PCRs were performed using the following conditions: 95°C for 2min, 35  
566 cycles of 95°C for 15s, 55/57°C for 15s, and 72°C for 10s, followed by 72°C for 10min. PCR  
567 products were run on 0.8-2% agarose gels (Bioline, Cat#: BIO-41025), depending on fragment  
568 size, pre-stained with SYBR Safe Nucleic Acid Gel Stain (Invitrogen, Cat#: S33102). A Typhoon  
569 FLA 9000 (GE Healthcare Life Sciences) was used for gel imaging. Gel fragments were excised  
570 under a Safe Imager 2.0 Blue-Light Transilluminator (Invitrogen). DNA purification was  
571 performed using the QIAquick Gel Extraction Kit (Qiagen, Cat#: 28706) or MinElute Gel  
572 Extraction Kit (Qiagen, Cat#: 28606) according to the manufacturer's instructions. PCR fragments  
573 were either sequenced directly or cloned using the pGEM-T Easy Vector System (Promega, Cat#:  
574 A1360) and Sanger sequenced to resolve insertion characteristics, as shown in **Supplementary**  
575 **Table 3**.

576

### 577 **L1-mCherry retrotransposition assays**

578 The L1-mCherry construct is derived from the construct pTN201, a pCEP4-based vector  
579 containing the native mouse element L1<sub>spa</sub><sup>22</sup>. The L1<sub>spa</sub> coding sequence was modified by site-  
580 directed mutagenesis to include two nonsynonymous nucleotide substitutions, rendering the  
581 ORF1p amino acid sequence identical to that of the L1 T<sub>F</sub> subfamily consensus sequence<sup>103</sup>. The  
582 3'UTR is interrupted by a reporter cassette based on previously described L1 retrotransposition  
583 indicator plasmids<sup>19,104</sup>. This reporter cassette consists of the mCherry coding sequence in  
584 antisense orientation to the L1 and is equipped with an EF1 $\alpha$  promoter and HSVtk polyadenylation  
585 signal. The mCherry ORF is interrupted by a  $\beta$ -globin intron oriented in sense to the L1. The  
586 mCherry cassette was cloned using G-block double-stranded DNA fragments synthesized by  
587 Integrated DNA Technologies (IDT) and PCR products generated using Q5 DNA polymerase  
588 (New England Biolabs, Cat#: M0492). The mCherry coding sequence was synthesized with silent

589 mutations ablating potential splice donor and splice acceptor sites that could interfere with  
590 intended splicing of the intron. In the L1-mCherry construct, the final 157bp of the L1<sub>spa</sub> 3'UTR,  
591 which includes a conserved poly-purine tract, are situated downstream of the mCherry cassette  
592 and immediately upstream of the pCEP4 SV40 polyadenylation signal. The L1-mCherry\_RT-  
593 mutant contains a missense mutation in the reverse transcriptase domain of ORF2 (D709Y)<sup>22</sup>.  
594 Plasmids were prepared using a Qiagen Plasmid Plus Midi Kit and a QIAvac vacuum manifold  
595 (Qiagen, Cat#: 12145).

596 HeLa-JVM cells<sup>19</sup> were cultured at 37°C and 5% CO<sub>2</sub> in HeLa complete medium (DMEM,  
597 Life Technologies, Cat#: 11960044) supplemented with 10% FBS (Life Technologies, Cat#:  
598 10099141), 1% Glutamax (Life Technologies, Cat#: 35050061) and 1% penicillin-streptomycin  
599 (Life Technologies, Cat#: 15140122). Cells were passaged at 70-80% confluency using 0.25%  
600 Trypsin-EDTA (Life Technologies, Cat#: 25200072). Cultured cell retrotransposition assays were  
601 then performed as described previously<sup>66,104</sup>, except retrotransposition was detected by mCherry  
602 fluorescence instead of EGFP fluorescence. Briefly, 1×10<sup>5</sup> HeLa-JVM cells were seeded per well  
603 of a 6-well plate. Eighteen hours later, cells were transfected with 1µg L1-mCherry or L1-  
604 mCherry\_RT- plasmid per well using 3µL FuGENE HD transfection reagent (Promega, Cat#:  
605 E2311) and 97µL Opti-MEM (Life Technologies, Cat#: 31985047) per well according to the  
606 manufacturer's protocol. Twenty-four hours post-transfection, medium was replaced with either  
607 HeLa complete medium with 200µg/mL Hygromycin (Life Technologies, Cat#: 10687010), or  
608 HeLa complete medium with 200µg/mL Hygromycin and 100µM Lamivudine (Sigma-Aldrich,  
609 Cat#: L1295-10MG). Medium was replaced every other day, and at 8 days post-transfection cells  
610 were collected by trypsinization, resuspended in sterile PBS, and analyzed on a CytoFLEX flow  
611 cytometer (Beckman Coulter) to determine the percentage of mCherry positive cells. Three  
612 biological replicate assays were performed, each consisting of 3 assayed wells per condition  
613 (technical replicates).

614

### 615 **L1-mneoI retrotransposition assays**

616 To prepare reporter constructs, miPSC\_1\_L1 and miPSC\_4\_L1 were amplified from genomic  
617 DNA using an Expand Long Range dNTPack (Roche, Cat#: 4829034001). Reaction mixes  
618 contained 5µL 5× Expand Long Range Buffer with 12.5mM MgCl<sub>2</sub>, 1.25µL dNTP Mix (dATP,  
619 dCTP, dGTP, dTTP at 10mM each), 1.25µL DMSO (100%), 1µL primer mix (50µM of each

620 primer), 0.35 $\mu$ L Expand Long Range Enzyme Mix (5U/ $\mu$ L), 10ng genomic DNA template and  
621 molecular grade water, up to a total volume of 25 $\mu$ L. PCRs were performed with the following  
622 cycling conditions: 92°C for 3min, 10 cycles of 92°C for 30s, 58°C for 30s, and 68°C for 7min 30s;  
623 25 cycles of 92°C for 30sec, 58°C for 30s, and 68°C for 7min plus 20s elongation for each  
624 successive cycle, followed by 68°C for 10min. Primers introduced a *NotI* restriction site at the L1  
625 5' end (miPSC\_1\_L1\_F, 5'-tttgcggccgcagaaagggaataatcgaggtg-3'; miPSC\_1\_L1\_R, 5'-  
626 gctaagcttgagaataagtgaagga-3'; miPSC\_4\_L1\_F, 5'-agggcggccgcaggattaagaaccaatcaccag-3';  
627 miPSC\_4\_L1\_R, 5'-aaaatgctgtgtgccaat-3'). Reactions were purified using agarose gel  
628 electrophoresis. Target fragments were excised and purified using either traditional phenol-  
629 chloroform extraction or QIAquick and MinElute Gel Extraction Kits (Qiagen, Cat#: 28706 and  
630 28604). Each L1 was then cloned into pGEMT Easy Vector (Promega, Cat#: A1360). Ligations  
631 were incubated overnight at 4°C. Ligation reactions were transformed using One Shot TOP10  
632 chemically competent *E. coli* (Invitrogen, Cat#: C404010). Blue/white screening was performed  
633 using LB/ampicillin/IPTG/X-Gal plates. At least 3 positive colonies per L1 were chosen for  
634 Miniprep culture and plasmid DNA was isolated using a QIAprep Spin Miniprep Kit (Qiagen,  
635 Cat#: 27106). At least three clones per element were capillary sequenced and compared to identify  
636 PCR-induced mutations. Full-length L1s were then reconstructed by combining PCR-mutation  
637 free fragments from different clones using restriction enzymes (New England Biolabs) recognizing  
638 the L1 sequence. Reactions were purified using agarose gel electrophoresis and target fragments  
639 were excised and purified using QIAquick and MinElute Gel Extraction Kits (Qiagen, Cat#: 28706  
640 and 28604).

641 pTN201 was used to generate L1 reporter constructs. pTN201 is composed of a pCEP4  
642 backbone (Life Technologies) containing L1<sub>spa</sub>, a retrotransposition-competent L1 T<sub>F</sub><sup>22</sup> and a  
643 downstream mneoI retrotransposition reporter cassette<sup>105</sup>. The mneoI cassette is driven by an SV40  
644 promoter and holds the neomycin resistance gene, which is interrupted by an intron and is  
645 positioned antisense to L1<sub>spa</sub>. In this assay, neomycin (or its analog, Geneticin/G418) resistance  
646 only occurs via transcription, splicing and integration of the L1 and mneoI cassette into genomic  
647 DNA<sup>19,66</sup>. To measure miPSC\_1\_L1 and miPSC\_4\_L1 retrotransposition efficiency, L1<sub>spa</sub> was  
648 removed from the pCEP4 backbone by digesting with *NotI* and *PacI*. The pCEP4 backbone was  
649 dephosphorylated using Calf Intestinal Alkaline Phosphatase (CIP) (New England Biolabs, Cat#:  
650 M0290). The backbone and fragments of either miPSC\_1\_L1 or miPSC\_4\_L1 were combined in

651 a single ligation reaction using T4 DNA Ligase (New England Biolabs, Cat#: M0202) and  
652 incubated overnight at 16°C. Ligations were transformed using One Shot TOP10 chemically  
653 competent *E. coli* (Invitrogen, Cat#: C404010) and plasmid DNA of positive clones was obtained  
654 using QIAprep Spin Miniprep Kit (Qiagen, Cat#: 27106). Clones were verified as mutation-free  
655 by capillary sequencing. Plasmid DNA for retrotransposition assays was obtained using a Plasmid  
656 Maxi Kit (Qiagen, Cat#: 12163). Each construct was built with and without a cytomegalovirus  
657 promoter (CMVp) preceding the L1. In addition, the following controls, each based on a pCEP4  
658 backbone containing the mneoI cassette, were employed: TGF21, a retrotransposition-competent  
659 L1 G<sub>F</sub><sup>21</sup>; L1SM, a synthetic codon optimized mouse L1<sup>67</sup>; L1SMmut2, L1SM immobilized by  
660 reverse transcriptase and endonuclease domains mutations<sup>67</sup>.

661 Retrotransposition assays were performed as previously described<sup>66</sup>, with minor  
662 modifications. HeLa-JVM cells were grown in HeLa complete medium (DMEM, Life  
663 Technologies, Cat#: 11960044) supplemented with 10% FBS (Life Technologies, Cat#:  
664 10099141), 1% Glutamax (Life Technologies, Cat#: 35050061) and 1% penicillin-streptomycin  
665 (Life Technologies, Cat#: 15140122), and then seeded at a density of 4×10<sup>4</sup> cells/well in 6-well  
666 tissue culture plates. 14-16h after plating, cells were transfected with L1 reporter constructs using  
667 4μL FuGENE HD transfection reagent (Promega, Cat#: E2311) 96μL Opti-MEM (Life  
668 Technologies, Cat#: 31985047) and 1μg plasmid DNA per well. Transfection efficiencies were  
669 determined in parallel by preparing transfection mixes containing 4μL FuGENE HD transfection  
670 reagent (Promega, Cat#: E2311), 96μL Opti-MEM (Life Technologies, Cat#: 31985047), 0.5μg  
671 L1 expression plasmid and 0.5μg pCEP4-eGFP. The transfection mixture was added to each well  
672 containing 2mL DMEM-complete medium. Plates were incubated at 37°C and 5% CO<sub>2</sub>, medium  
673 replaced 24h post-transfection, and transfection efficiency determined 72h post-transfection.  
674 pCEP4-eGFP transfected wells were trypsinized and cells were collected from each well and  
675 centrifuged at 2000g for 5min. Cell pellets were resuspended in 300-500μL 1× PBS. The number  
676 of eGFP-positive cells was determined using a CytoFLEX flow cytometer (Beckman Coulter). The  
677 percentage of eGFP-positive cells was used to normalize the G418-resistant colony counts for each  
678 L1 reporter construct<sup>66</sup>. G418 (400μg/mL) (Thermo Fisher Scientific, Cat#: 10131035) selection  
679 was started 3 days post-transfection and performed for 12 days. G418 foci were washed with 1×  
680 PBS and fixed using 2% Formaldehyde/0.2% Glutaraldehyde in 1× PBS (Sigma-Aldrich) fixing  
681 solution at room temperature for 30min. Staining was done using 0.1% Crystal Violet solution

682 (Sigma-Aldrich) at room temperature for 10min. Foci were counted in each well to quantify  
683 retrotransposition.

684

### 685 **L1 bisulfite sequencing experiments**

686 Bisulfite conversion was performed with 200ng input genomic DNA from miPSC lines and MEFs  
687 using a EZ DNA Methylation-Lightning Kit (Zymo Research, Cat#: D5030), following the  
688 manufacturer's instructions. DNA was eluted in 10 $\mu$ L Elution Buffer. The internal sequences of  
689 L1 T<sub>F</sub> monomers were amplified genome-wide with the following primers: BS\_TfIII\_mono\_F, 5'-  
690 GGAAATTAGTTTGAATAGGTTAGAGGGTG; BS\_TfIII\_mono\_R, 5'-  
691 TCCTAAATTCCAAAAATCCTAAAACCAAA. The following locus-specific primers were  
692 used to target the 5' promoter region of the following elements of interest: BS\_miPSC\_1\_L1\_F,  
693 5'-TGATTTATTTTTGATTGAATTTATTTTTAT; BS\_miPSC\_1\_L1\_R/donor\_L1\_R,  
694 5'-CTATTCAAATAATTCCTAAATTCTACTA; BS\_miPSC\_3\_L1\_F, 5'-  
695 TAGTTGGGGTTGTATGATGTAAGTT; BS\_miPSC\_3\_L1\_R, 5'-  
696 TCCCAAAACTATCTAATTCTCTAAC; BS\_miPSC\_4\_L1\_F, 5'-  
697 TTTATATTGAAGGTTTGGATGATTTTATAT; BS\_miPSC\_4\_L1\_R, 5'-  
698 TCCAATTCTCTAATACACCCTCTAAC; BS\_donor\_L1\_F , 5'-  
699 TTAAAGAAGTTAGTGATTTTTTAGAATTTT.

700 PCRs were performed using MyTaq HS DNA Polymerase (Bioline, Cat#: BIO-21111). Reaction  
701 mixes contained 5 $\mu$ L 5 $\times$  MyTaq Reaction Buffer, 0.5 $\mu$ L primer mix (25 $\mu$ M of each primer), 0.2 $\mu$ L  
702 MyTaq HS DNA Polymerase, DMSO at a final concentration of 0.1%, 2 $\mu$ L bisulfite converted  
703 DNA template, and molecular grade water up to a total volume of 25 $\mu$ L. PCR cycling parameters  
704 were as follows: 95 $^{\circ}$ C for 2min, 40 cycles of 95 $^{\circ}$ C for 30s, 54 $^{\circ}$ C for 30s, and 72 $^{\circ}$ C for 30s, followed  
705 by 72 $^{\circ}$ C for 5min. PCR products were run on a 2% agarose gel, excised and purified using a  
706 MinElute Gel Extraction Kit (Qiagen, Cat#: 28604) according to the manufacturer's instructions.  
707 Illumina libraries were constructed using a NEBNext Ultra<sup>TM</sup> II DNA Library Prep Kit (New  
708 England Biolabs, Cat#: E7645). Libraries were quantified using a Bioanalyzer DNA 1000 chip  
709 (Agilent Technologies, Cat#: 5067-1504). Barcoded libraries were pooled in equimolar amounts  
710 and sequenced as 2x300mer reads on an Illumina MiSeq platform using a MiSeq Reagent Kit v3  
711 (Illumina, Cat#: MS-102-3003). 50% PhiX Control v3 (Illumina, Cat#: FC-110-3001) was used as  
712 a spike-in. Sequencing data were analyzed as described previously<sup>34</sup>. To summarize, for the L1 T<sub>F</sub>

713 genome-wide analysis, paired-end reads were considered separately and those with the L1 T<sub>F</sub>  
714 bisulfite PCR primers at their termini were retained and aligned to the mock converted T<sub>F</sub>  
715 monomer target amplicon sequence with blastn. Reads where non-CpG cytosine bisulfite  
716 conversion was <95%, or ≥5% of CpG dinucleotides were mutated, or ≥5% of adenine and guanine  
717 nucleotides were mutated, were removed. 50 reads per sample, excluding identical bisulfite  
718 sequences, were randomly selected and analyzed using QUMA<sup>106</sup> with default parameters, with  
719 strict CpG recognition. Specific L1 loci were analyzed in a similar fashion, except paired-end reads  
720 were assembled into contigs, as described elsewhere<sup>34</sup>, prior to blastn alignment to the mock  
721 converted L1 locus target amplicon.

722

### 723 **Nanopore sequencing analyses**

724 Genomic DNA was extracted from 2 miPSC lines reprogrammed without 3TC, 2 miPSC lines  
725 generated without 3TC, and the parental MEFs, with a Nanobind CBB Big DNA Kit (Circulomics,  
726 Cat#: NB-900-001-01) according to the manufacturer's instructions. DNA libraries were prepared  
727 at the Kinghorn Centre for Clinical Genomics (KCCG, Australia) using 3μg input DNA, without  
728 shearing, and an SQK-LSK110 ligation sequencing kit. Libraries were each sequenced separately  
729 on a PromethION (Oxford Nanopore Technologies) flow cell (FLO-PRO002, R9.4.1 chemistry)  
730 (**Supplementary Table 1**). Bases were called with guppy 5.0.13 (Oxford Nanopore  
731 Technologies).

732 Non-reference TE insertions were detected with TLDR<sup>35</sup>. Briefly, this involved aligning  
733 ONT reads to the mm10 reference genome using minimap2<sup>107</sup> version 2.20 (index parameter: -x  
734 map-ont; alignment parameters: -ax map-ont -L -t 32) and SAMtools<sup>108</sup> version 1.12. BAM files  
735 were then processed as a group with TLDR<sup>35</sup> version 1.2.2 (parameters -e teref.mouse.fa -p 128 -  
736 m 1 -r mm10.fa -n nonref.collection.mm10.chr.bed.gz --keep\_pickles). The files teref.mouse.fa,  
737 composed of TE family consensus sequences, and nonref.collection.mm10.chr.bed.gz, a collection  
738 of known non-reference retrotransposon insertions, are available from  
739 [github.com/adamewing/tldr/](https://github.com/adamewing/tldr/). The TLDR output table was further processed to remove calls not  
740 passing relevant TLDR filters, where family = "NA" or remappable = "FALSE" or UnmapCover  
741 < 0.5 or LengthIns < 100 or EndTE-StartTE < 100 or strand = "None" or SpanReads < 1. 3'  
742 truncated TE insertions, and B1 or B2 insertions 5' truncated by more than 2bp, were removed.  
743 Events detected in only one miPSC line and not matching a known non-reference insertion were

744 designated as putative *de novo* insertions (**Supplementary Table 3**).

745 Reference TE methylation was assessed for parental MEFs and an miPSC line not treated  
746 with 3TC (CTRL 2) with Methylartist version 1.0.6<sup>81</sup>. Briefly, CpG methylation calls were  
747 generated from ONT reads using nanopolish version 0.13.2<sup>109</sup>. Using Methylartist commands db-  
748 nanopolish, segmeth and segplot with default parameters, methylation statistics were generated for  
749 the genome divided into 10kbp bins, protein-coding gene promoters defined the Eukaryotic  
750 Promoter Database (-1000bp,+500bp)<sup>110</sup>, and reference TEs defined by RepeatMasker coordinates  
751 (<http://www.repeatmasker.org/>). TE families displayed in **Fig. 4c** included T<sub>F</sub>, G<sub>F</sub>, and A-type L1s  
752 >6kbp, B1 and B2 SINEs, and MERVL MT2 and IAP elements represented by their long terminal  
753 repeats. Methylation values were calculated for L1 5'UTRs only, excluding the L1 body.  
754 Methylation profiles for individual loci were generated using the Methylartist command locus. L1  
755 T<sub>F</sub> methylation profiles shown in **Fig. 4d** were generated for elements >7kbp with the Methylartist  
756 command composite. To identify individual differentially methylated TEs (**Supplementary Table**  
757 **5**), we required elements to have at least 4 reads and 20 methylation calls in each sample. Statistical  
758 comparisons were performed based on methylated and unmethylated CpG call counts, using  
759 Fisher's exact test with Bonferroni correction for multiple testing.

760

#### 761 **Data availability**

762 All Oxford Nanopore Technologies and Illumina sequencing data generated by this study were  
763 deposited in the European Nucleotide Archive (ENA) under project PRJEB20569.

764

#### 765 **Code availability**

766 TEBreak, TLDR and Methylartist, and instructions for their use, are available at  
767 <https://github.com/adamewing/tebreak>, <https://github.com/adamewing/TLDR> and  
768 <https://github.com/adamewing/methylartist>, respectively.

769

#### 770 **References**

- 771 1. Takahashi, K. & Yamanaka, S. Induction of pluripotent stem cells from mouse embryonic  
772 and adult fibroblast cultures by defined factors. *Cell* **126**, 663–676 (2006).
- 773 2. Mandai, M. *et al.* Autologous Induced Stem-Cell-Derived Retinal Cells for Macular  
774 Degeneration. *N. Engl. J. Med.* **376**, 1038–1046 (2017).



- 775 3. Takahashi, K. & Yamanaka, S. A decade of transcription factor-mediated reprogramming to  
776 pluripotency. *Nat. Rev. Mol. Cell Biol.* **17**, 183–193 (2016).
- 777 4. Tapia, N. & Schöler, H. R. Molecular Obstacles to Clinical Translation of iPSCs. *Cell Stem*  
778 *Cell* **19**, 298–309 (2016).
- 779 5. Gore, A. *et al.* Somatic coding mutations in human induced pluripotent stem cells. *Nature*  
780 **471**, 63–67 (2011).
- 781 6. Hussein, S. M. *et al.* Copy number variation and selection during reprogramming to  
782 pluripotency. *Nature* **471**, 58–62 (2011).
- 783 7. Lister, R. *et al.* Hotspots of aberrant epigenomic reprogramming in human induced  
784 pluripotent stem cells. *Nature* **471**, 68–73 (2011).
- 785 8. Polo, J. M. *et al.* Cell type of origin influences the molecular and functional properties of  
786 mouse induced pluripotent stem cells. *Nat. Biotechnol.* **28**, 848–855 (2010).
- 787 9. Laurent, L. C. *et al.* Dynamic changes in the copy number of pluripotency and cell  
788 proliferation genes in human ESCs and iPSCs during reprogramming and time in culture.  
789 *Cell Stem Cell* **8**, 106–118 (2011).
- 790 10. Young, M. A. *et al.* Background mutations in parental cells account for most of the genetic  
791 heterogeneity of induced pluripotent stem cells. *Cell Stem Cell* **10**, 570–582 (2012).
- 792 11. Cheng, L. *et al.* Low incidence of DNA sequence variation in human induced pluripotent  
793 stem cells generated by nonintegrating plasmid expression. *Cell Stem Cell* **10**, 337–344  
794 (2012).
- 795 12. Quinlan, A. R. *et al.* Genome sequencing of mouse induced pluripotent stem cells reveals  
796 retroelement stability and infrequent DNA rearrangement during reprogramming. *Cell Stem*  
797 *Cell* **9**, 366–373 (2011).
- 798 13. Abyzov, A. *et al.* Somatic copy number mosaicism in human skin revealed by induced  
799 pluripotent stem cells. *Nature* **492**, 438–442 (2012).
- 800 14. Kazazian, H. H., Jr & Moran, J. V. Mobile DNA in Health and Disease. *N. Engl. J. Med.*  
801 **377**, 361–370 (2017).
- 802 15. Doucet, A. J., Wilusz, J. E., Miyoshi, T., Liu, Y. & Moran, J. V. A 3' Poly(A) Tract Is  
803 Required for LINE-1 Retrotransposition. *Mol. Cell* **60**, 728–741 (2015).
- 804 16. Jurka, J. Sequence patterns indicate an enzymatic involvement in integration of mammalian  
805 retroposons. *Proc. Natl. Acad. Sci. U. S. A.* **94**, 1872–1877 (1997).

- 806 17. Luan, D. D., Korman, M. H., Jakubczak, J. L. & Eickbush, T. H. Reverse transcription of  
807 R2Bm RNA is primed by a nick at the chromosomal target site: a mechanism for non-LTR  
808 retrotransposition. *Cell* **72**, 595–605 (1993).
- 809 18. Monot, C. *et al.* The specificity and flexibility of 11 reverse transcription priming at  
810 imperfect T-tracts. *PLoS Genet.* **9**, e1003499 (2013).
- 811 19. Moran, J. V. *et al.* High frequency retrotransposition in cultured mammalian cells. *Cell* **87**,  
812 917–927 (1996).
- 813 20. Wei, W. *et al.* Human L1 retrotransposition: cispreference versus trans complementation.  
814 *Mol. Cell. Biol.* **21**, 1429–1439 (2001).
- 815 21. Goodier, J. L., Ostertag, E. M., Du, K. & Kazazian, H. H., Jr. A novel active L1  
816 retrotransposon subfamily in the mouse. *Genome Res.* **11**, 1677–1685 (2001).
- 817 22. Naas, T. P. *et al.* An actively retrotransposing, novel subfamily of mouse L1 elements.  
818 *EMBO J.* **17**, 590–597 (1998).
- 819 23. Nellåker, C. *et al.* The genomic landscape shaped by selection on transposable elements  
820 across 18 mouse strains. *Genome Biol.* **13**, R45 (2012).
- 821 24. Skowronski, J., Fanning, T. G. & Singer, M. F. Unit-length line-1 transcripts in human  
822 teratocarcinoma cells. *Mol. Cell. Biol.* **8**, 1385–1397 (1988).
- 823 25. Beck, C. R. *et al.* LINE-1 retrotransposition activity in human genomes. *Cell* **141**, 1159–  
824 1170 (2010).
- 825 26. Brouha, B. *et al.* Hot L1s account for the bulk of retrotransposition in the human  
826 population. *Proc. Natl. Acad. Sci. U. S. A.* **100**, 5280–5285 (2003).
- 827 27. Ewing, A. D. & Kazazian, H. H., Jr. High-throughput sequencing reveals extensive  
828 variation in human-specific L1 content in individual human genomes. *Genome Res.* **20**,  
829 1262–1270 (2010).
- 830 28. Richardson, S. R. *et al.* Heritable L1 retrotransposition in the mouse primordial germline  
831 and early embryo. *Genome Res.* **27**, 1395–1405 (2017).
- 832 29. Stewart, C. *et al.* A comprehensive map of mobile element insertion polymorphisms in  
833 humans. *PLoS Genet.* **7**, e1002236 (2011).
- 834 30. Feusier, J. *et al.* Pedigree-based estimation of human mobile element retrotransposition  
835 rates. *Genome Res.* **29**, 1567–1577 (2019).
- 836 31. de la Rica, L. *et al.* TET-dependent regulation of retrotransposable elements in mouse

- 837 embryonic stem cells. *Genome Biol.* **17**, 234 (2016).
- 838 32. Warkocki, Z. *et al.* Uridylation by TUT4/7 Restricts Retrotransposition of Human LINE-1s.  
839 *Cell* **174**, 1537–1548.e29 (2018).
- 840 33. Deniz, Ö., Frost, J. M. & Branco, M. R. Regulation of transposable elements by DNA  
841 modifications. *Nat. Rev. Genet.* **20**, 417–431 (2019).
- 842 34. Sanchez-Luque, F. J. *et al.* LINE-1 Evasion of Epigenetic Repression in Humans. *Mol. Cell*  
843 **75**, 590–604 (2019).
- 844 35. Ewing, A. D. *et al.* Nanopore Sequencing Enables Comprehensive Transposable Element  
845 Epigenomic Profiling. *Mol. Cell* **80**, 915–928.e5 (2020).
- 846 36. Bourc’his, D. & Bestor, T. H. Meiotic catastrophe and retrotransposon reactivation in male  
847 germ cells lacking Dnmt3L. *Nature* **431**, 96–99 (2004).
- 848 37. Walter, M., Teissandier, A., Pérez-Palacios, R. & Bourc’his, D. An epigenetic switch  
849 ensures transposon repression upon dynamic loss of DNA methylation in embryonic stem  
850 cells. *Elife* **5**, e11418 (2016).
- 851 38. Greenberg, M. V. C. & Bourc’his, D. The diverse roles of DNA methylation in mammalian  
852 development and disease. *Nat. Rev. Mol. Cell Biol.* **20**, 590–607 (2019).
- 853 39. Goodier, J. L. Restricting retrotransposons: a review. *Mob. DNA* **7**, 16 (2016).
- 854 40. Chelmicki, T. *et al.* m6A RNA methylation regulates the fate of endogenous retroviruses.  
855 *Nature* **591**, 312–316 (2021).
- 856 41. MacLennan, M. *et al.* Mobilization of LINE-1 retrotransposons is restricted by Tex19.1 in  
857 mouse embryonic stem cells. *Elife* **6**, (2017).
- 858 42. Salvador-Palomeque, C. *et al.* Dynamic Methylation of an L1 Transduction Family during  
859 Reprogramming and Neurodifferentiation. *Mol. Cell. Biol.* **39**, (2019).
- 860 43. Lee, D.-S. *et al.* An epigenomic roadmap to induced pluripotency reveals DNA methylation  
861 as a reprogramming modulator. *Nat. Commun.* **5**, 5619 (2014).
- 862 44. Knaupp, A. S. *et al.* Transient and Permanent Reconfiguration of Chromatin and  
863 Transcription Factor Occupancy Drive Reprogramming. *Cell Stem Cell* **21**, 834–845.e6  
864 (2017).
- 865 45. Klawitter, S. *et al.* Reprogramming triggers endogenous L1 and Alu retrotransposition in  
866 human induced pluripotent stem cells. *Nat. Commun.* **7**, e10286 (2016).
- 867 46. Friedli, M. *et al.* Loss of transcriptional control over endogenous retroelements during

- 868 reprogramming to pluripotency. *Genome Res.* **24**, 1251–1259 (2014).
- 869 47. Maherali, N. *et al.* Directly reprogrammed fibroblasts show global epigenetic remodeling  
870 and widespread tissue contribution. *Cell Stem Cell* **1**, 55–70 (2007).
- 871 48. Habibi, E. *et al.* Whole-genome bisulfite sequencing of two distinct interconvertible DNA  
872 methylomes of mouse embryonic stem cells. *Cell Stem Cell* **13**, 360–369 (2013).
- 873 49. Garcia-Perez, J. L. *et al.* LINE-1 retrotransposition in human embryonic stem cells. *Hum.*  
874 *Mol. Genet.* **16**, 1569–1577 (2007).
- 875 50. Macia, A. *et al.* Engineered LINE-1 retrotransposition in nondividing human neurons.  
876 *Genome Res.* **27**, 335–348 (2017).
- 877 51. Wissing, S. *et al.* Reprogramming somatic cells into iPS cells activates LINE-1  
878 retroelement mobility. *Hum. Mol. Genet.* **21**, 208–218 (2012).
- 879 52. Stadtfeld, M., Maherali, N., Borkent, M. & Hochedlinger, K. A reprogrammable mouse  
880 strain from gene-targeted embryonic stem cells. *Nat. Methods* **7**, 53–55 (2010).
- 881 53. McKenna, A. *et al.* The Genome Analysis Toolkit: a MapReduce framework for analyzing  
882 next-generation DNA sequencing data. *Genome Res.* **20**, 1297–1303 (2010).
- 883 54. Garrison, E. & Marth, G. Haplotype-based variant detection from short-read sequencing.  
884 *arXiv [q-bio.GN]* arXiv:1207.3907 (2012).
- 885 55. Keane, T. M. *et al.* Mouse genomic variation and its effect on phenotypes and gene  
886 regulation. *Nature* **477**, 289–294 (2011).
- 887 56. Rausch, T. *et al.* DELLY: structural variant discovery by integrated paired-end and split-  
888 read analysis. *Bioinformatics* **28**, i333–i339 (2012).
- 889 57. Cameron, D. L. *et al.* GRIDSS: sensitive and specific genomic rearrangement detection  
890 using positional de Bruijn graph assembly. *Genome Res.* **27**, 2050–2060 (2017).
- 891 58. Ewing, A. D. Transposable element detection from whole genome sequence data. *Mob.*  
892 *DNA* **6**, 24 (2015).
- 893 59. Carreira, P. E. *et al.* Evidence for L1-associated DNA rearrangements and negligible L1  
894 retrotransposition in glioblastoma multiforme. *Mob. DNA* **7**, 21 (2016).
- 895 60. Schauer, S. N. *et al.* L1 retrotransposition is a common feature of mammalian  
896 hepatocarcinogenesis. *Genome Res.* **28**, 639–653 (2018).
- 897 61. Ostertag, E. M. & Kazazian, H. H., Jr. Twin priming: a proposed mechanism for the  
898 creation of inversions in L1 retrotransposition. *Genome Res.* **11**, 2059–2065 (2001).

- 899 62. Kano, H. *et al.* L1 retrotransposition occurs mainly in embryogenesis and creates somatic  
900 mosaicism. *Genes Dev.* **23**, 1303–1312 (2009).
- 901 63. van den Hurk, J. A. J. M. *et al.* L1 retrotransposition can occur early in human embryonic  
902 development. *Hum. Mol. Genet.* **16**, 1587–1592 (2007).
- 903 64. Sultana, T. *et al.* The Landscape of L1 Retrotransposons in the Human Genome Is Shaped  
904 by Pre-insertion Sequence Biases and Post-insertion Selection. *Mol. Cell* **74**, 555–570  
905 (2019).
- 906 65. Flasch, D. A. *et al.* Genome-wide de novo L1 Retrotransposition Connects Endonuclease  
907 Activity with Replication. *Cell* **177**, 837–851 (2019).
- 908 66. Kopera, H. C. *et al.* LINE-1 cultured cell retrotransposition assay. *Methods Mol. Biol.* **1400**,  
909 139–156 (2016).
- 910 67. Han, J. S. & Boeke, J. D. A highly active synthetic mammalian retrotransposon. *Nature*  
911 **429**, 314–318 (2004).
- 912 68. Meyer, T. J., Srikanta, D., Conlin, E. M. & Batzer, M. A. Heads or tails: L1 insertion-  
913 associated 5' homopolymeric sequences. *Mob. DNA* **1**, 7 (2010).
- 914 69. Miki, Y. *et al.* Disruption of the APC gene by a retrotransposal insertion of L1 sequence in  
915 a colon cancer. *Cancer Res.* **52**, 643–645 (1992).
- 916 70. Goodier, J. L., Ostertag, E. M. & Kazazian, H. H., Jr. Transduction of 3'-flanking sequences  
917 is common in L1 retrotransposition. *Hum. Mol. Genet.* **9**, 653–657 (2000).
- 918 71. Pickeral, O. K., Makałowski, W., Boguski, M. S. & Boeke, J. D. Frequent human genomic  
919 DNA transduction driven by LINE-1 retrotransposition. *Genome Res.* **10**, 411–415 (2000).
- 920 72. Moran, J. V., DeBerardinis, R. J. & Kazazian, H. H., Jr. Exon shuffling by L1  
921 retrotransposition. *Science* **283**, 1530–1534 (1999).
- 922 73. Holmes, S. E., Dombroski, B. A., Krebs, C. M., Boehm, C. D. & Kazazian, H. H., Jr. A new  
923 retrotransposable human L1 element from the LRE2 locus on chromosome 1q produces a  
924 chimaeric insertion. *Nat. Genet.* **7**, 143–148 (1994).
- 925 74. Banuelos-Sanchez, G. *et al.* Synthesis and Characterization of Specific Reverse  
926 Transcriptase Inhibitors for Mammalian LINE-1 Retrotransposons. *Cell Chem Biol* **26**,  
927 1095–1109.e14 (2019).
- 928 75. Dai, L., Huang, Q. & Boeke, J. D. Effect of reverse transcriptase inhibitors on LINE-1 and  
929 Ty1 reverse transcriptase activities and on LINE-1 retrotransposition. *BMC Biochem.* **12**, 18

- 930 (2011).
- 931 76. Smits, N. *et al.* No evidence of human genome integration of SARS-CoV-2 found by long-  
932 read DNA sequencing. *Cell Rep.* **36**, 109530 (2021).
- 933 77. Lanciano, S. & Cristofari, G. Measuring and interpreting transposable element expression.  
934 *Nat. Rev. Genet.* **21**, 721–736 (2020).
- 935 78. Zhou, W. *et al.* Identification and characterization of occult human-specific LINE-1  
936 insertions using long-read sequencing technology. *Nucleic Acids Res.* **48**, 1146–1163  
937 (2020).
- 938 79. Wolf, G. *et al.* KRAB-zinc finger protein gene expansion in response to active  
939 retrotransposons in the murine lineage. *Elife* **9**, e56337 (2020).
- 940 80. Heidmann, O. & Heidmann, T. Retrotransposition of a mouse IAP sequence tagged with an  
941 indicator gene. *Cell* **64**, 159–170 (1991).
- 942 81. Cheetham, S. W., Kindlova, M. & Ewing, A. D. Methylartist: Tools for Visualising  
943 Modified Bases from Nanopore Sequence Data. *bioRxiv* (2021)  
944 doi:10.1101/2021.07.22.453313.
- 945 82. Scott, E. C. *et al.* A hot L1 retrotransposon evades somatic repression and initiates human  
946 colorectal cancer. *Genome Res.* **26**, 745–755 (2016).
- 947 83. Shakiba, N. *et al.* Cell competition during reprogramming gives rise to dominant clones.  
948 *Science* **364**, (2019).
- 949 84. Saini, N. *et al.* The Impact of Environmental and Endogenous Damage on Somatic  
950 Mutation Load in Human Skin Fibroblasts. *PLoS Genet.* **12**, e1006385 (2016).
- 951 85. Macia, A. *et al.* Epigenetic control of retrotransposon expression in human embryonic stem  
952 cells. *Mol. Cell. Biol.* **31**, 300–316 (2011).
- 953 86. Grandi, F. C. *et al.* Retrotransposition creates sloping shores: a graded influence of  
954 hypomethylated CpG islands on flanking CpG sites. *Genome Res.* **25**, 1135–1146 (2015).
- 955 87. Dewannieux, M. & Heidmann, T. L1-mediated retrotransposition of murine B1 and B2  
956 SINEs recapitulated in cultured cells. *J. Mol. Biol.* **349**, 241–247 (2005).
- 957 88. Dewannieux, M., Esnault, C. & Heidmann, T. LINE-mediated retrotransposition of marked  
958 Alu sequences. *Nat. Genet.* **35**, 41–48 (2003).
- 959 89. Firas, J., Liu, X., Nefzger, C. M. & Polo, J. M. GM-CSF and MEF-conditioned media  
960 support feeder-free reprogramming of mouse granulocytes to iPS cells. *Differentiation* **87**,

- 961 193–199 (2014).
- 962 90. Bertoncetto, I. & McQualter, J. Isolation and clonal assay of adult lung epithelial  
963 stem/progenitor cells. *Current Protocols in Stem Cell Biology* **16**, (2011).
- 964 91. Seach, N., Wong, K., Hammett, M., Boyd, R. L. & Chidgey, A. P. Purified enzymes  
965 improve isolation and characterization of the adult thymic epithelium. *J. Immunol. Methods*  
966 **385**, 23–34 (2012).
- 967 92. Merlos-Suárez, A. *et al.* The intestinal stem cell signature identifies colorectal cancer stem  
968 cells and predicts disease relapse. *Cell Stem Cell* **8**, 511–524 (2011).
- 969 93. Jensen, K. B., Driskell, R. R. & Watt, F. M. Assaying proliferation and differentiation  
970 capacity of stem cells using disaggregated adult mouse epidermis. *Nat. Protoc.* **5**, 898–911  
971 (2010).
- 972 94. Alaei, S. *et al.* An improved reprogrammable mouse model harbouring the reverse  
973 tetracycline-controlled transcriptional transactivator 3. *Stem Cell Res.* **17**, 49–53 (2016).
- 974 95. Lim, S. M. *et al.* Temporal restriction of pancreatic branching competence during  
975 embryogenesis is mirrored in differentiating embryonic stem cells. *Stem Cells Dev.* **21**,  
976 1662–1674 (2012).
- 977 96. Liu, K. *et al.* KSR-based medium improves the generation of high-quality mouse iPS cells.  
978 *PLoS One* **9**, e105309 (2014).
- 979 97. Knaupp, A. S. *et al.* TINC—A Method to Dissect Regulatory Complexes at Single-Locus  
980 Resolution—Reveals an Extensive Protein Complex at the Nanog Promoter. *Stem cell*  
981 *reports* **15**, 1246–1259 (2020).
- 982 98. Li, H. Aligning sequence reads, clone sequences and assembly contigs with BWA-MEM.  
983 *arXiv [q-bio.GN]* arXiv:1303.3997 (2013).
- 984 99. Cingolani, P. *et al.* A program for annotating and predicting the effects of single nucleotide  
985 polymorphisms, SnpEff: SNPs in the genome of *Drosophila melanogaster* strain w1118;  
986 iso-2; iso-3. *Fly* **6**, 80–92 (2012).
- 987 100. Kent, W. J. *et al.* The human genome browser at UCSC. *Genome Res.* **12**, 996–1006 (2002).
- 988 101. Bao, W., Kojima, K. K. & Kohany, O. Repbase Update, a database of repetitive elements in  
989 eukaryotic genomes. *Mob. DNA* **6**, 11 (2015).
- 990 102. Untergasser, A. *et al.* Primer3--new capabilities and interfaces. *Nucleic Acids Res.* **40**, e115  
991 (2012).

- 992 103. Martin, S. L. *et al.* A single amino acid substitution in ORF1 dramatically decreases L1  
993 retrotransposition and provides insight into nucleic acid chaperone activity. *Nucleic Acids*  
994 *Res.* **36**, 5845–5854 (2008).
- 995 104. Ostertag, E. M., Prak, E. T., DeBerardinis, R. J., Moran, J. V. & Kazazian, H. H., Jr.  
996 Determination of L1 retrotransposition kinetics in cultured cells. *Nucleic Acids Res.* **28**,  
997 1418–1423 (2000).
- 998 105. Freeman, J. D., Goodchild, N. L. & Mager, D. L. A modified indicator gene for selection of  
999 retrotransposition events in mammalian cells. *Biotechniques* **17**, 46, 48–9, 52 (1994).
- 1000 106. Kumaki, Y., Oda, M. & Okano, M. QUMA: quantification tool for methylation analysis.  
1001 *Nucleic Acids Res.* **36**, W170–5 (2008).
- 1002 107. Li, H. Minimap2: pairwise alignment for nucleotide sequences. *Bioinformatics* **34**, 3094–  
1003 3100 (2018).
- 1004 108. Li, H. *et al.* The Sequence Alignment/Map format and SAMtools. *Bioinformatics* **25**, 2078–  
1005 2079 (2009).
- 1006 109. Simpson, J. T. *et al.* Detecting DNA cytosine methylation using nanopore sequencing. *Nat.*  
1007 *Methods* **14**, 407–410 (2017).
- 1008 110. Dreos, R., Ambrosini, G., Groux, R., Cavin Périer, R. & Bucher, P. The eukaryotic  
1009 promoter database in its 30th year: focus on non-vertebrate organisms. *Nucleic Acids Res.*  
1010 **45**, D51–D55 (2017).

## 1011 **Acknowledgements**

1012 The authors thank Jef D. Boeke and John V. Moran for sharing L1SM plasmids and the HeLa-  
1013 JVM cell line, respectively. The study was supported by an Australian Government Research  
1014 Training Program (RTP) Scholarship and a Mater Research Frank Clair Scholarship awarded to  
1015 P.G., ARC Discovery Early Career Researcher Award (DE150101117), Discovery Project  
1016 (DP170101198) and Australian Department of Health Medical Frontiers Future Fund (MRFF)  
1017 (MRF1175457) grants awarded to A.D.E., NHMRC Project Grant (GNT1051117), ARC Future  
1018 Fellowship (FT180100674) and Sylvia and Charles Viertel Senior Medical Research Fellowship  
1019 funds awarded to J.M.P., NHMRC Investigator Grants (GNT1178460 to R.L., GNT1173476 to  
1020 S.R.R., GNT1173711 to G.J.F.), and CSL Centenary Fellowship and NHMRC Project Grant  
1021 (GNT1106206, GNT1125645, GNT1126393, GNT1138795) funding awarded to G.J.F.. A.D.E.,  
1022 S.R.R. and G.J.F. additionally acknowledge support from the Mater Foundation.



1023

1024 **Author contributions**

1025 P.G., S.M.L., M.R.L., D.C., F.J.S-L., L.W., C.J., A.S.K., P.E.C., C.M.N. and S.R.R. performed  
1026 experiments. R.L., J.M.P. and G.J.F. provided resources. A.D.E. and G.J.F. performed  
1027 bioinformatic analyses. P.G., S.R.R., J.M.P. and G.J.F. conceived the study and designed  
1028 experiments. P.G., S.R.R. and G.J.F. generated figures. G.J.F. wrote the manuscript and directed  
1029 the study. All authors commented on the manuscript.

1030

1031 **Competing interests**

1032 The authors declare no competing interests.

**a**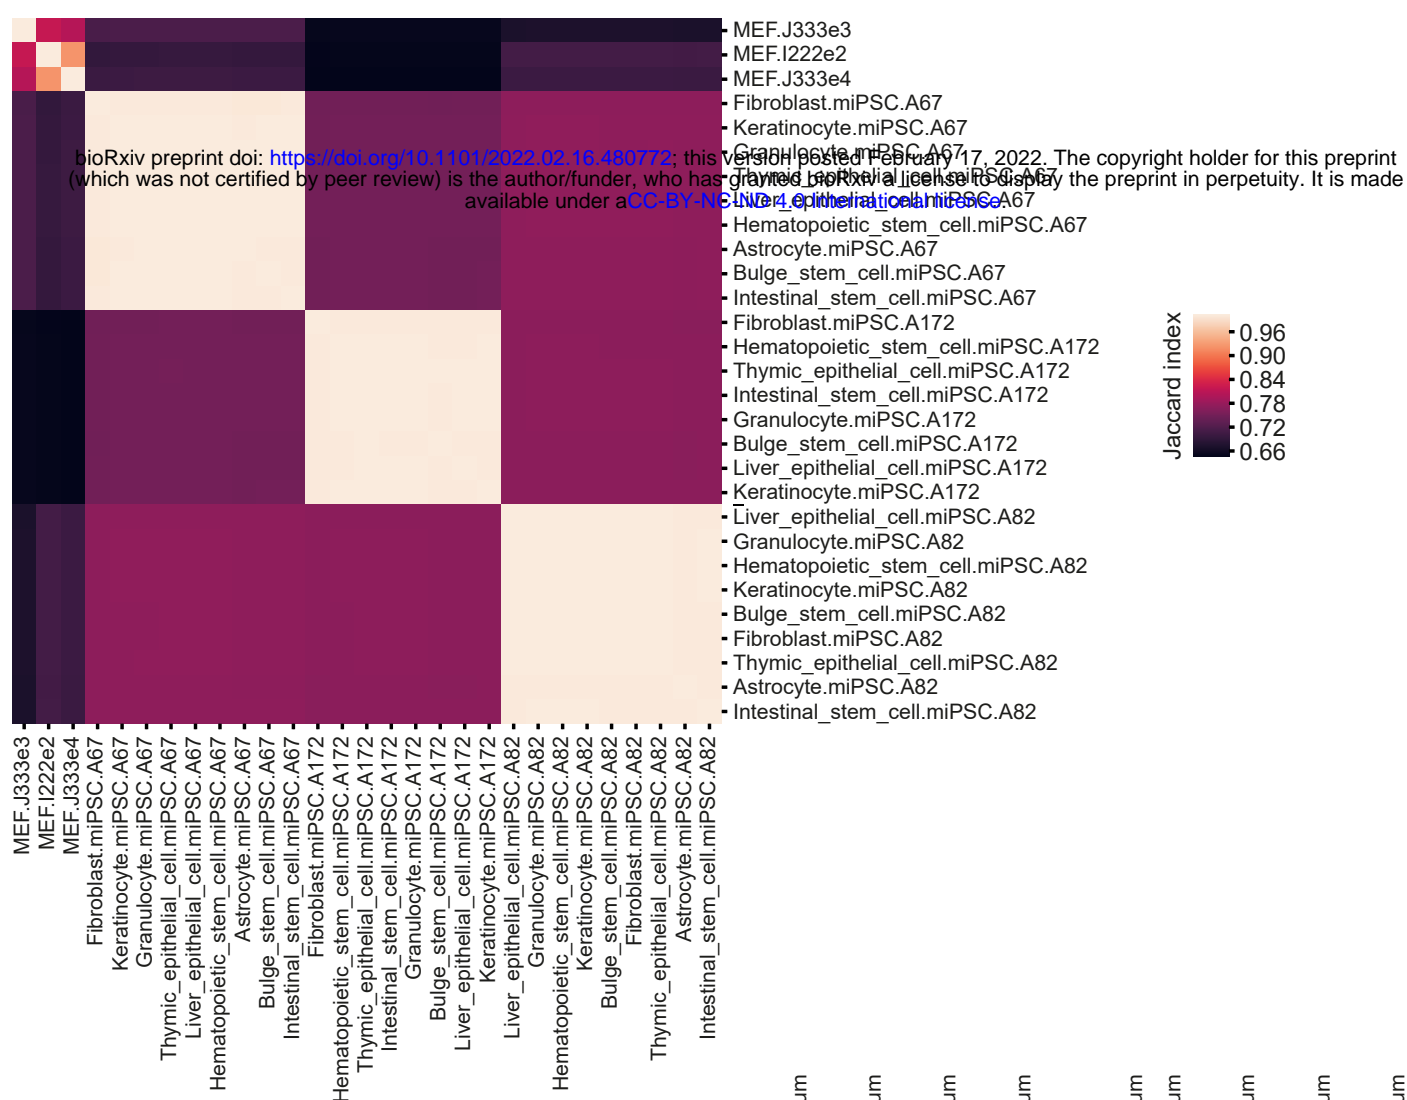**b**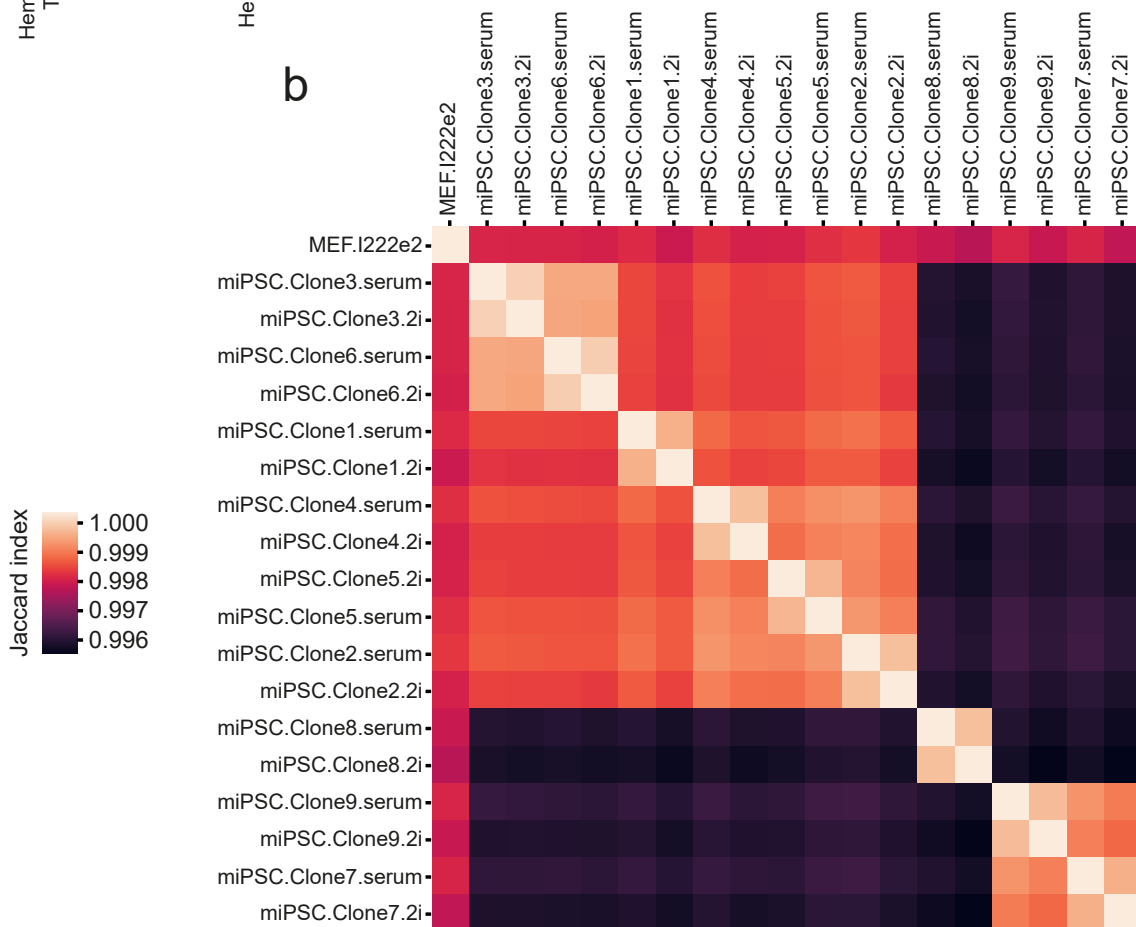

**Extended Data Fig. 1: miPSC line genotypic relationships.** **a**, Clustering of miPSC lines derived from 9 primary cell types isolated from 3 animals (A67, A82, A172), and 3 MEF genotypic controls. For each pairwise comparison, the Jaccard index ( $J$ ) was calculated as the ratio of the union and intersection of SNP/INDEL variants called from WGS data and shared by the sample pair. Known SNPs/INDELS were removed and filtered as described in the Methods.  $J=1$  (light color on key) indicates an identical variant profile between a sample pair, whereas  $J=0$  (dark color on key) indicates no variants in common. Hierarchical clustering was performed using average linkage and a Euclidean distance metric via the seaborn clustermap function. **b**, As for panel (a), except for 9 single-cell clones derived from animal I222e2 MEFs and cultured in serum or 2i conditions.

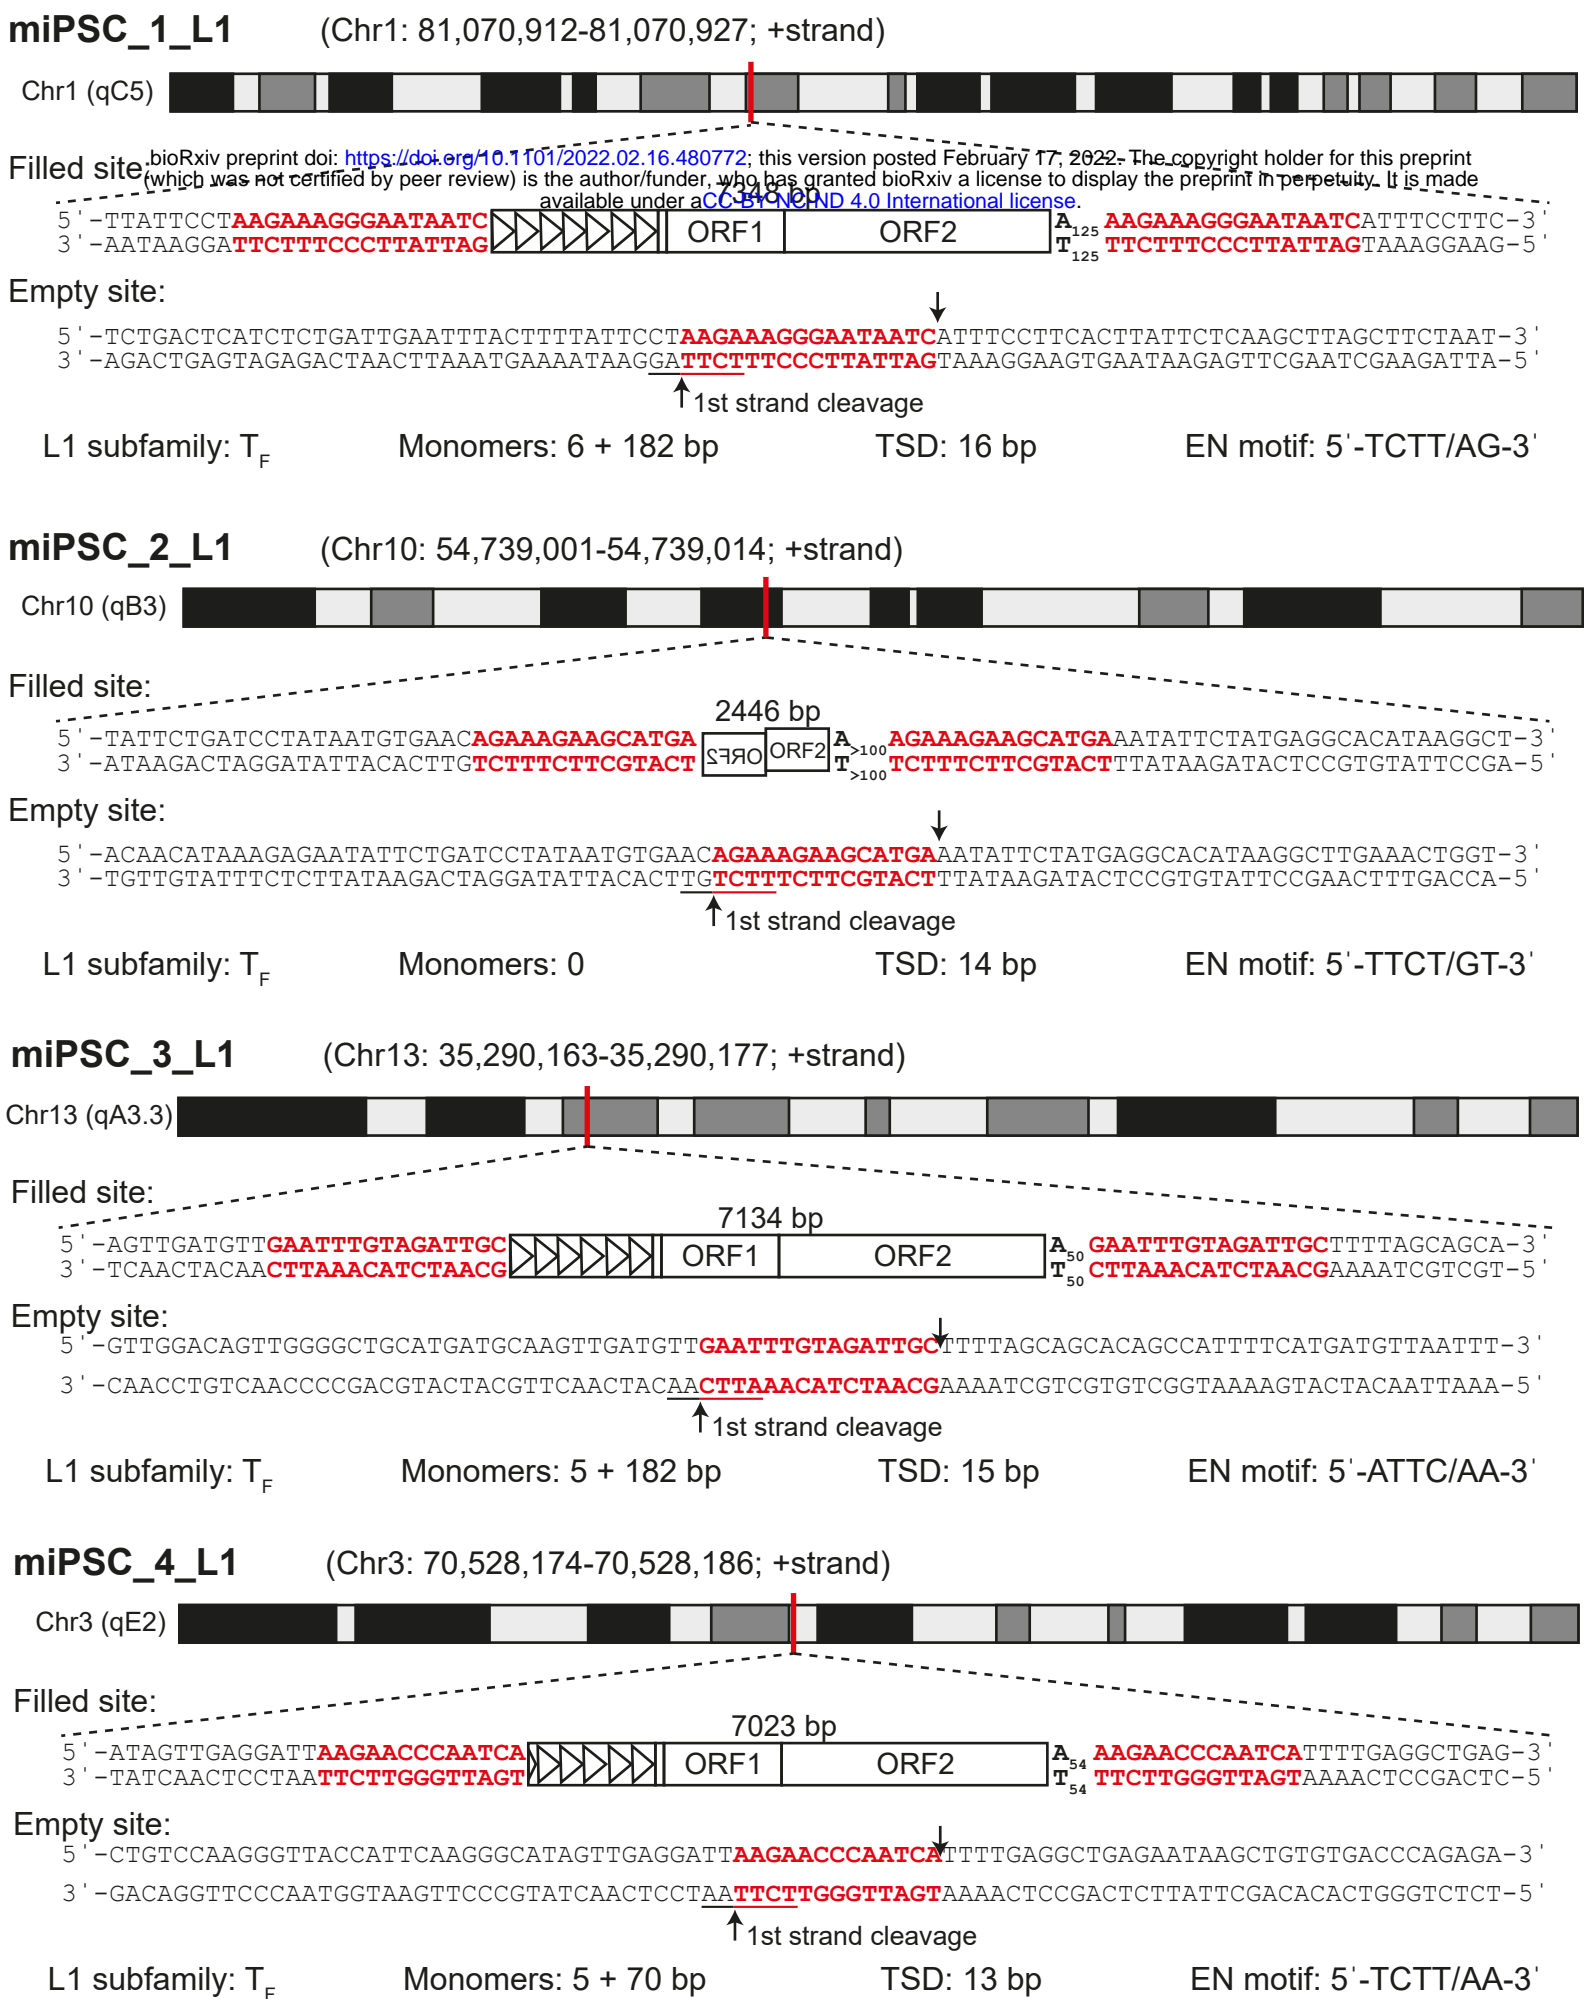

**Extended Data Fig. 2: Sequence characteristics of *de novo* L1 insertions detected in bulk tissue-derived miPSCs.** For each of four insertions, the following information is provided: the chromosomal location; a filled site illustration indicating target site duplication (TSD) sequences in red, the number of promoter monomers (black triangles) if applicable, and 3' polyA tract length (A<sub>n</sub>/T<sub>n</sub>); an empty site illustration depicting TSD sequence and first strand endonuclease (EN) cleavage motif (underlined); summary characteristics (L1 subfamily, number of monomers, TSD length and EN motif).

# Figure S3

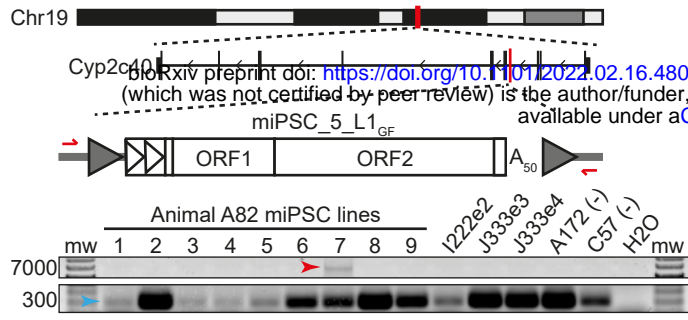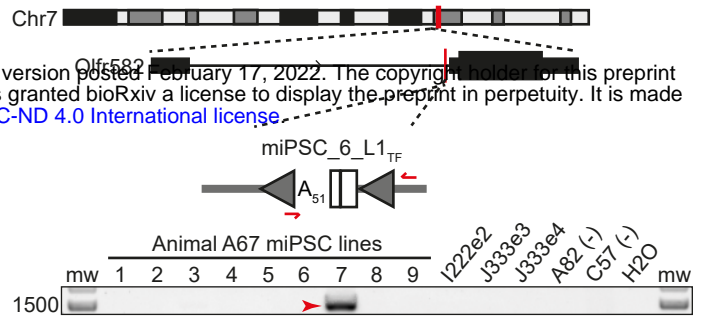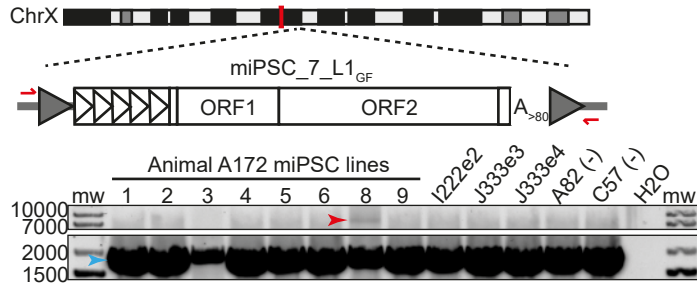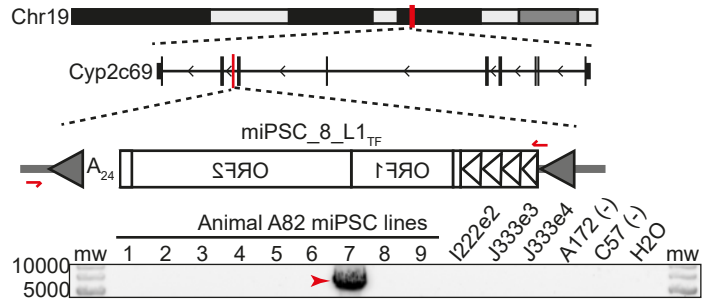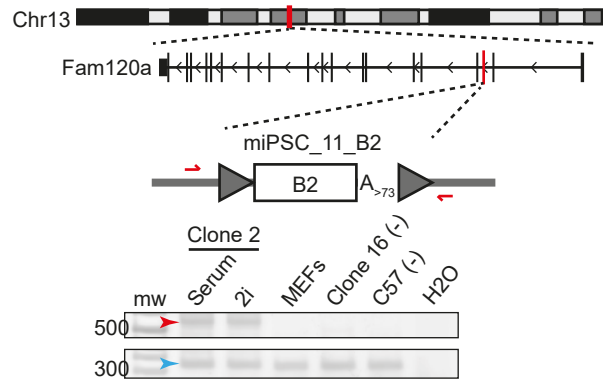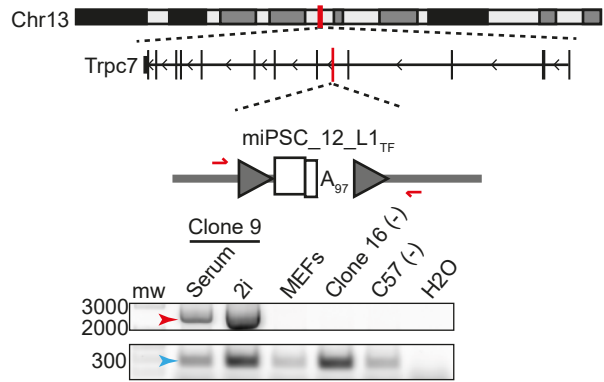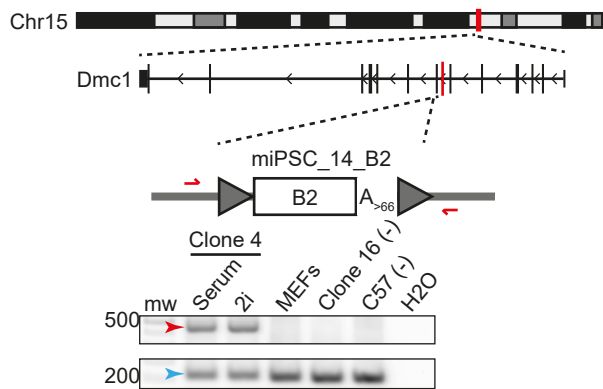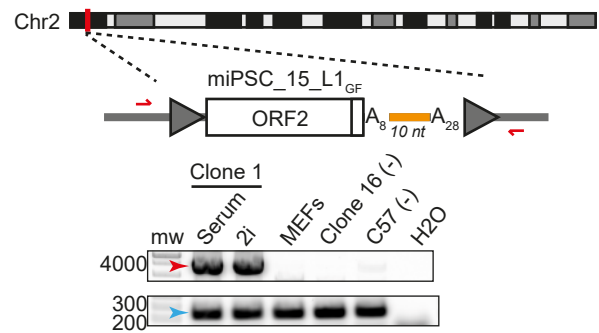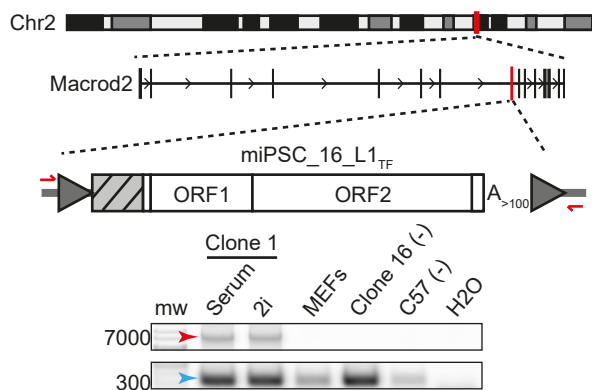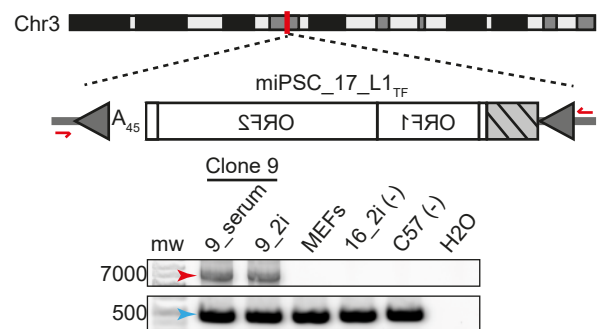

bioRxiv preprint doi: <https://doi.org/10.1101/2022.02.16.480772>; this version posted February 17, 2022. The copyright holder for this preprint (which was not certified by peer review) is the author/funder, who has granted bioRxiv a license to display the preprint in perpetuity. It is made available under a [CC-BY-NC-ND 4.0 International license](https://creativecommons.org/licenses/by-nc-nd/4.0/).

Chr3

Chr4

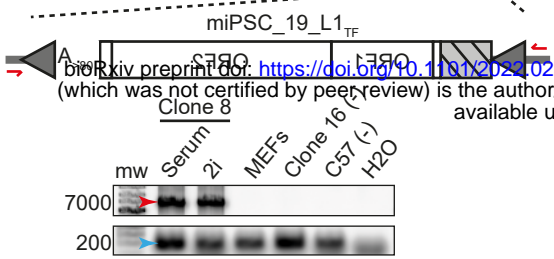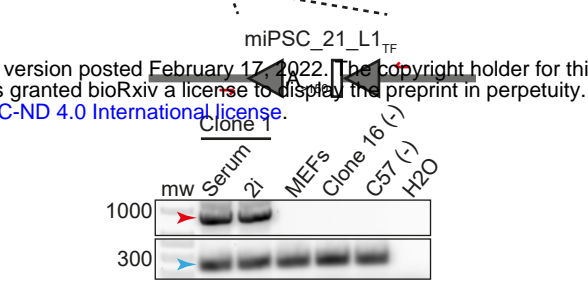

Chr6

Chr9

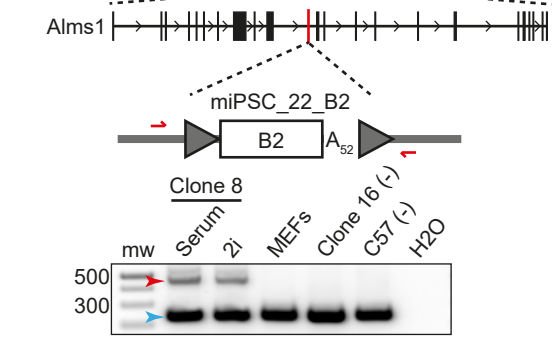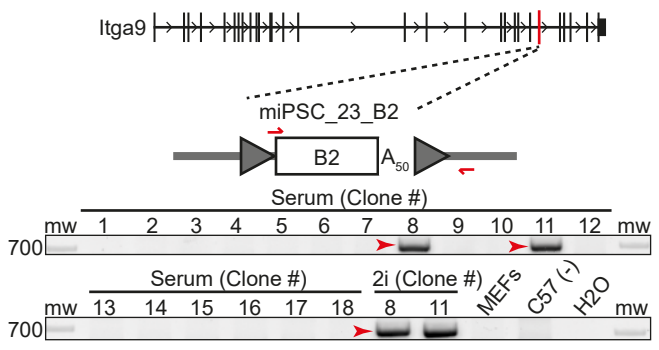

ChrX

Chr1

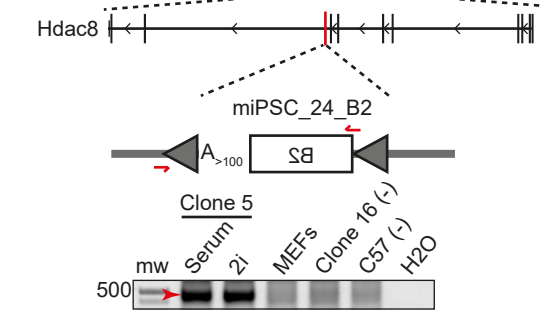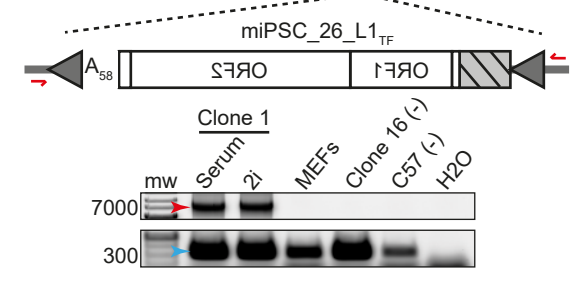

Chr11

Chr13

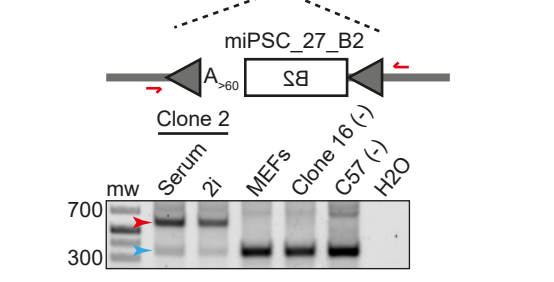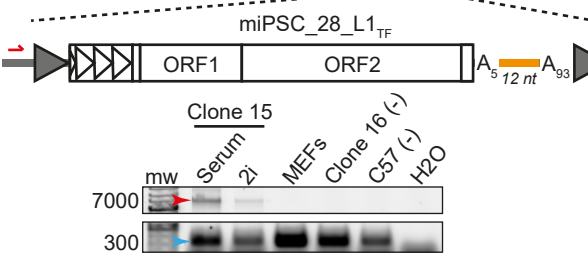

Chr15

Chr6

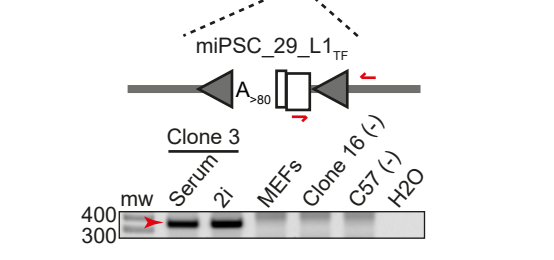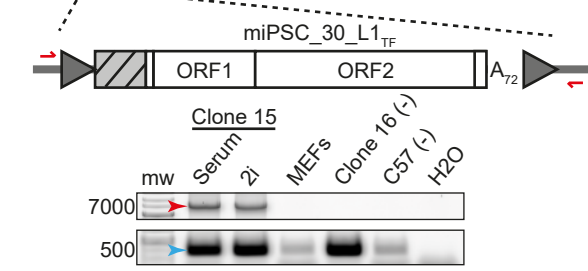

bioRxiv preprint doi: <https://doi.org/10.1101/2022.02.16.480772>; this version posted February 17, 2022. The copyright holder for this preprint (which was not certified by peer review) is the author/funder, who has granted bioRxiv a license to display the preprint in perpetuity. It is made available under aCC-BY-NC-ND 4.0 International license.

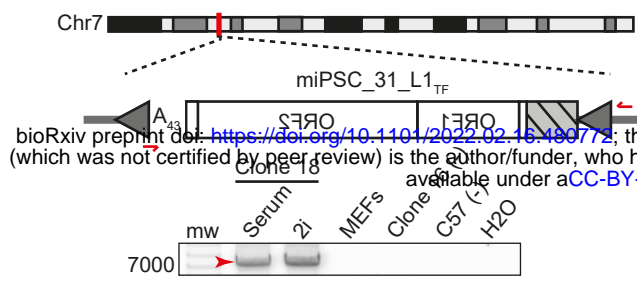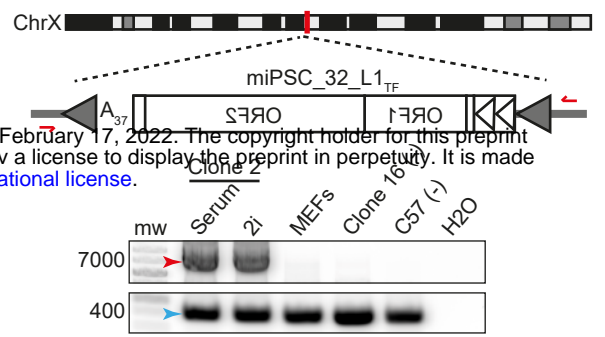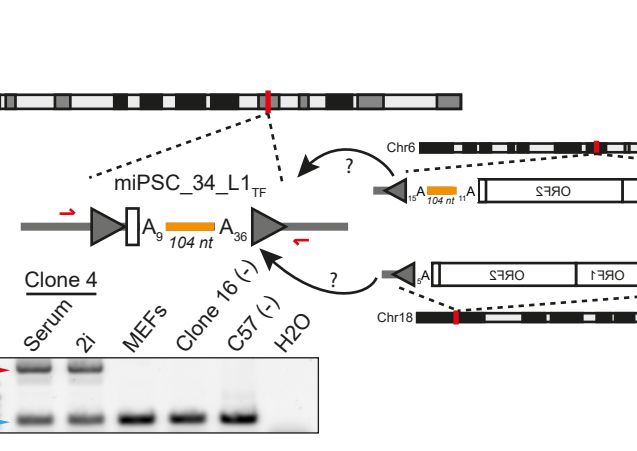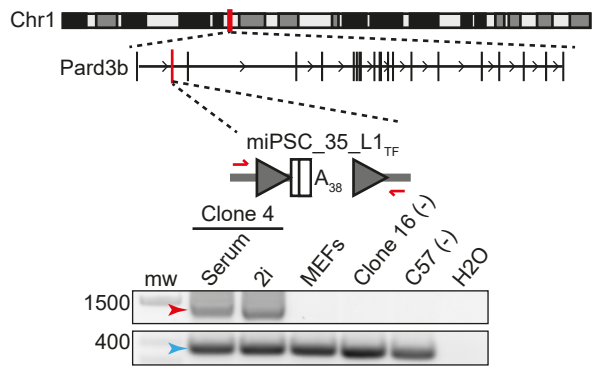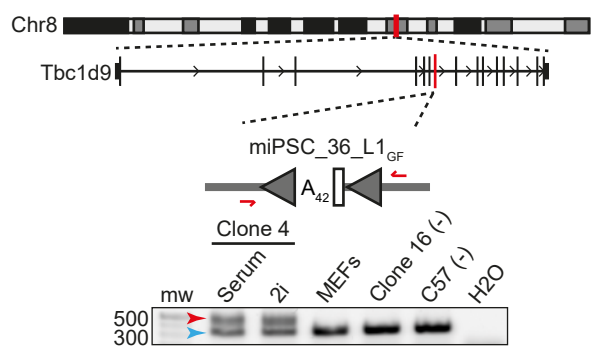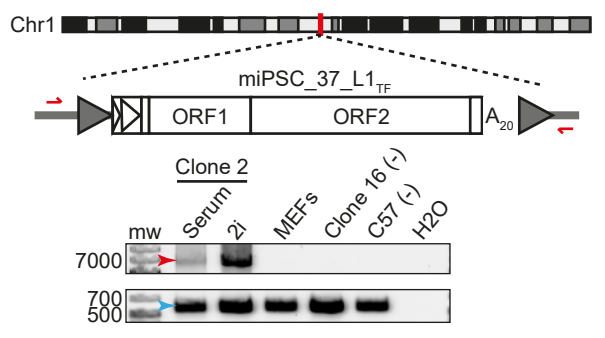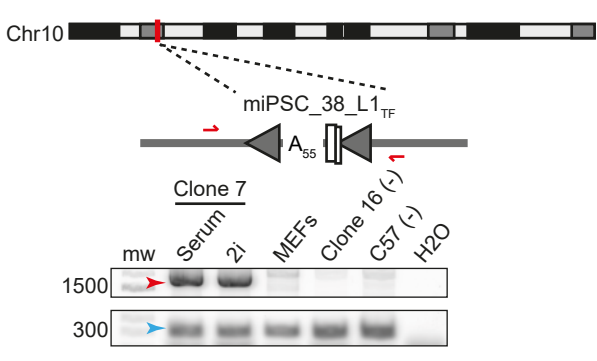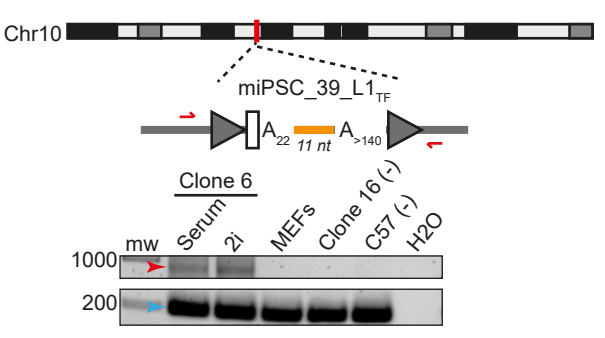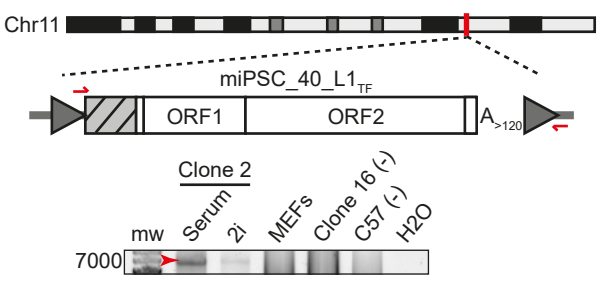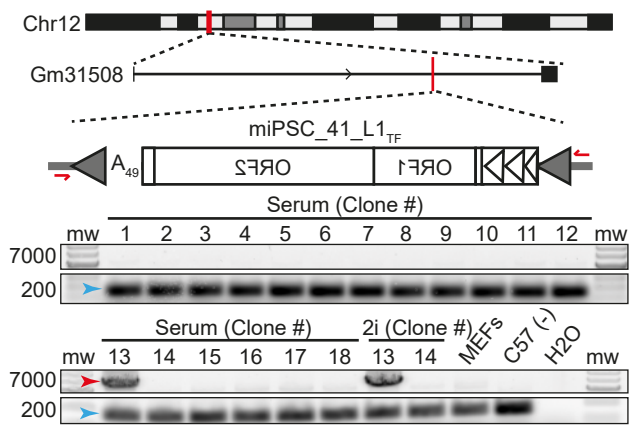

bioRxiv preprint doi: <https://doi.org/10.1101/2022.02.16.490772>; this version posted February 17, 2022. The copyright holder for this preprint (which was not certified by peer review) is the author/funder, who has granted bioRxiv a license to display the preprint in perpetuity. It is made available under aCC-BY-NC-ND 4.0 International license.

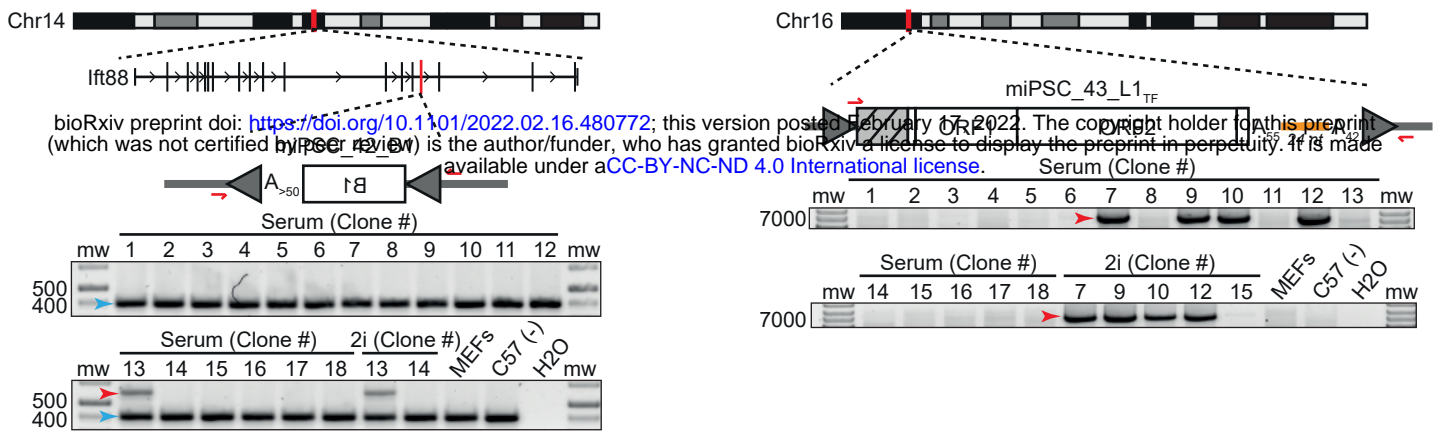

**Extended Data Fig. 3: Additional *de novo* TE insertion validation and characterization.** *De novo* TE insertions found in 26 bulk miPSC lines generated from primary cells or 18 single-cell miPSC clones derived from MEFs. For each insertion, the chromosomal location and orientation are shown. L1 and SINE B1 and B2 insertions are represented by white rectangles. L1 5'UTR promoter monomers, if present, are indicated by triangles or, if the number of monomers is unknown, a grey box with black stripes. Poly(A) tracts and their length are indicated ( $A_n$ ), and target site duplications (TSDs) are depicted as grey arrows. 3' transductions are shown as orange lines. PCR validation primers are shown as red arrows. PCR products in agarose gels used to confirm TE insertions are indicated by red arrows. Empty site (wild-type) amplicons are indicated by blue arrows, where applicable.

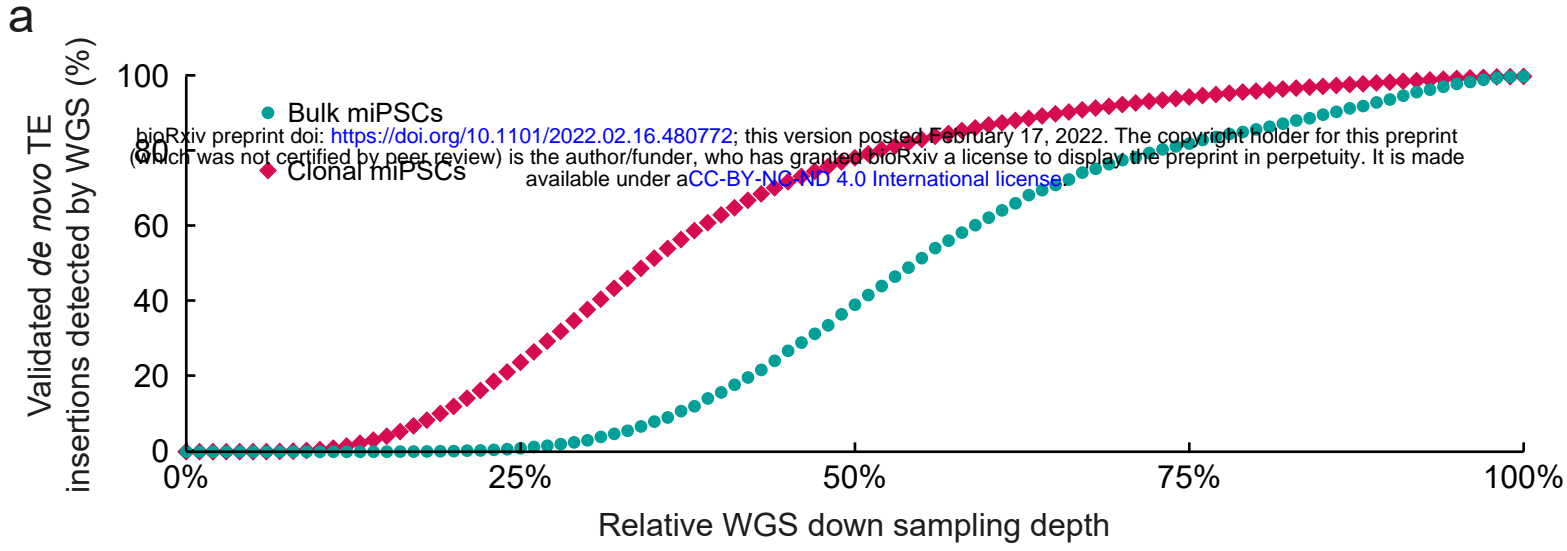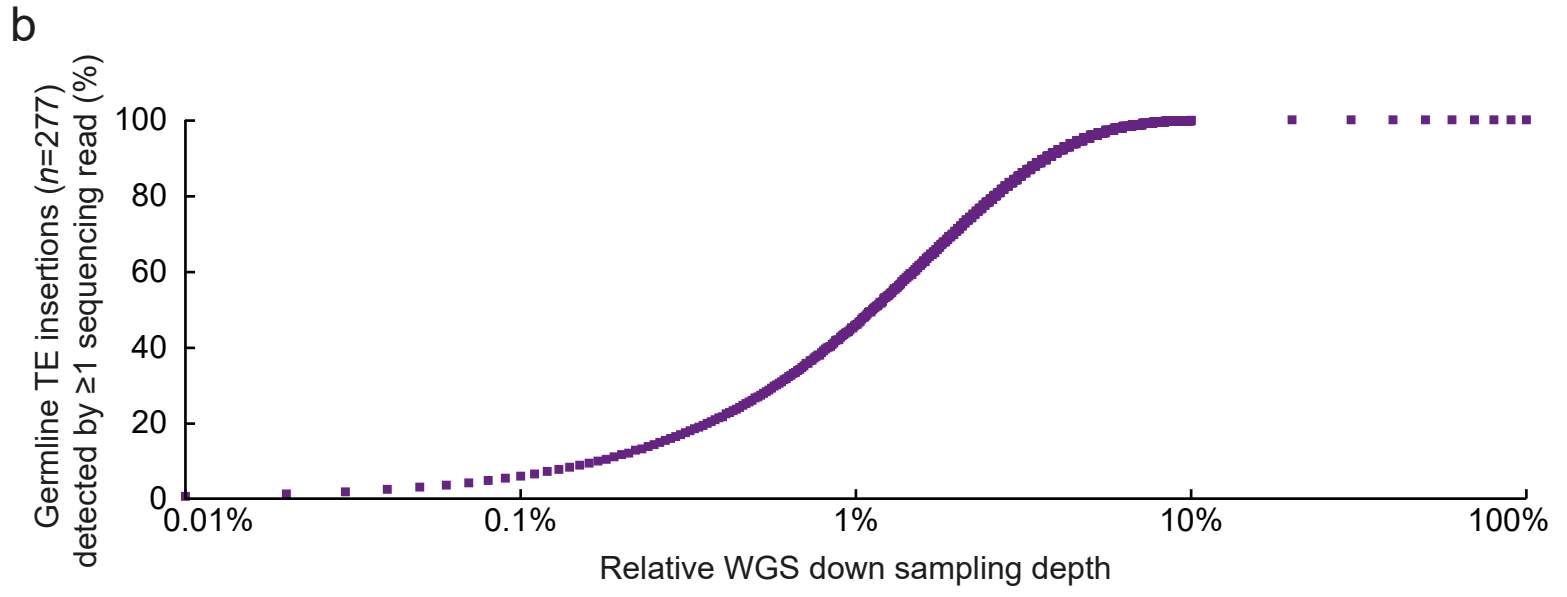

**Extended Data Fig. 4: TE detection sensitivities at simulated sequencing depths. a,** To assess whether PCR validated *de novo* TE insertions would have been initially overlooked by lower coverage WGS, we down sampled our  $\sim 41\times$  average depth WGS in percentile increments. In order to be called as present, *de novo* insertions found in the bulk (*top*) and single-cell (*bottom*) miPSC experiments required  $\geq 1$  WGS read at each of their 5' and 3' junctions, and  $\geq 10$  WGS reads in total. **b,** To estimate the likelihood of a mosaic TE insertion being overlooked in the parental animal I222e2 MEF population, and called as *de novo* in one of the associated clonal miPSC lines, we defined a set of 277 heterozygous germline TE insertions found in I222e2 and that were detected by  $\geq 25$  WGS or mRC-seq reads at each of their 5' and 3' junctions. We then simulated the probability of at least one read being found for an insertion when the reads assigned to that insertion were assigned probabilities to achieve random sampling depths ranging from 0.01% to 100% of the parental MEF bulk sequencing data. Note: at each depth in panels (a) and (b), simulations were repeated 10,000 times.



a

bioRxiv preprint doi: <https://doi.org/10.1101/2022.02.16.480772>; this version posted February 17, 2022. The copyright holder for this preprint (which was not certified by peer review) is the author/funder, who has granted bioRxiv a license to display the preprint in perpetuity. It is made available under aCC-BY-NC-ND 4.0 International license.

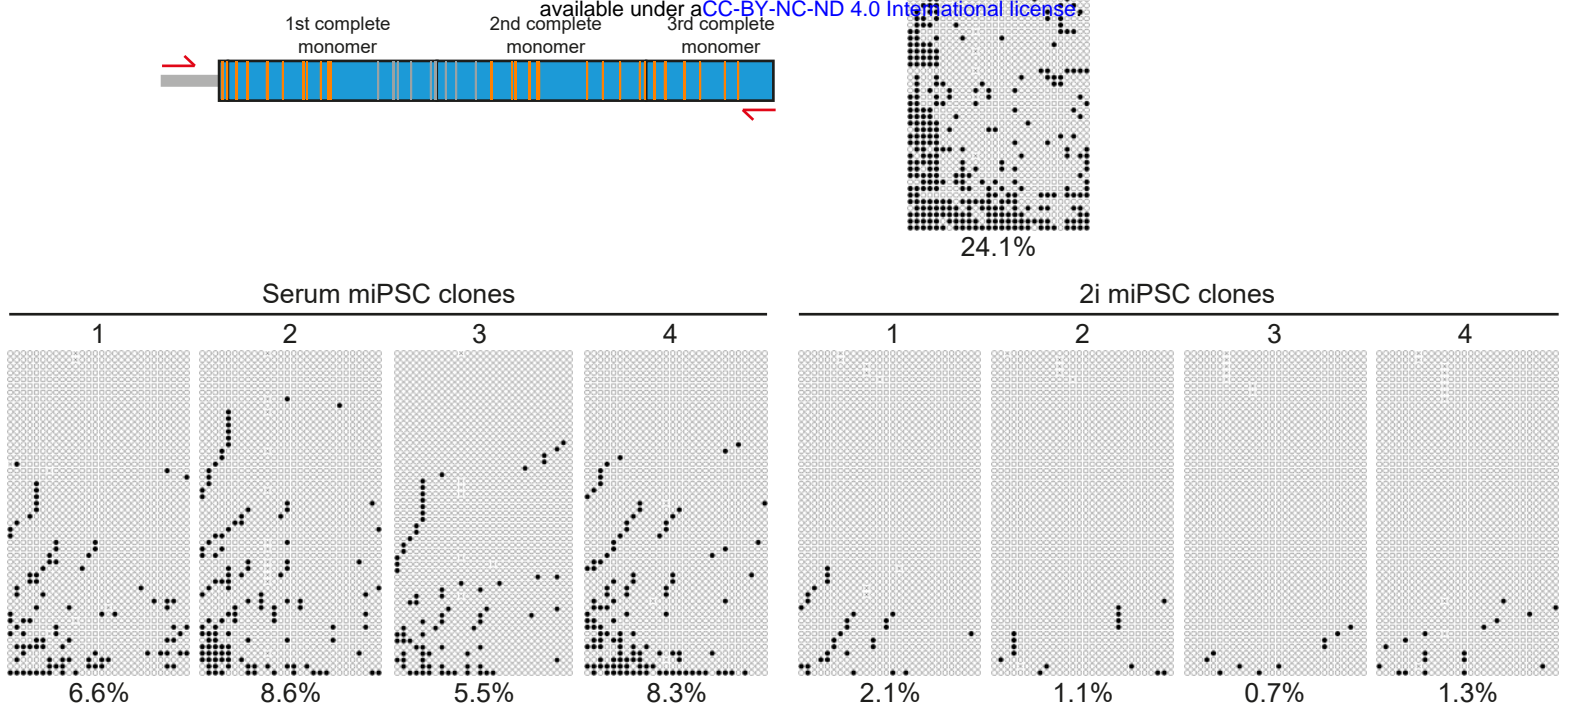

b

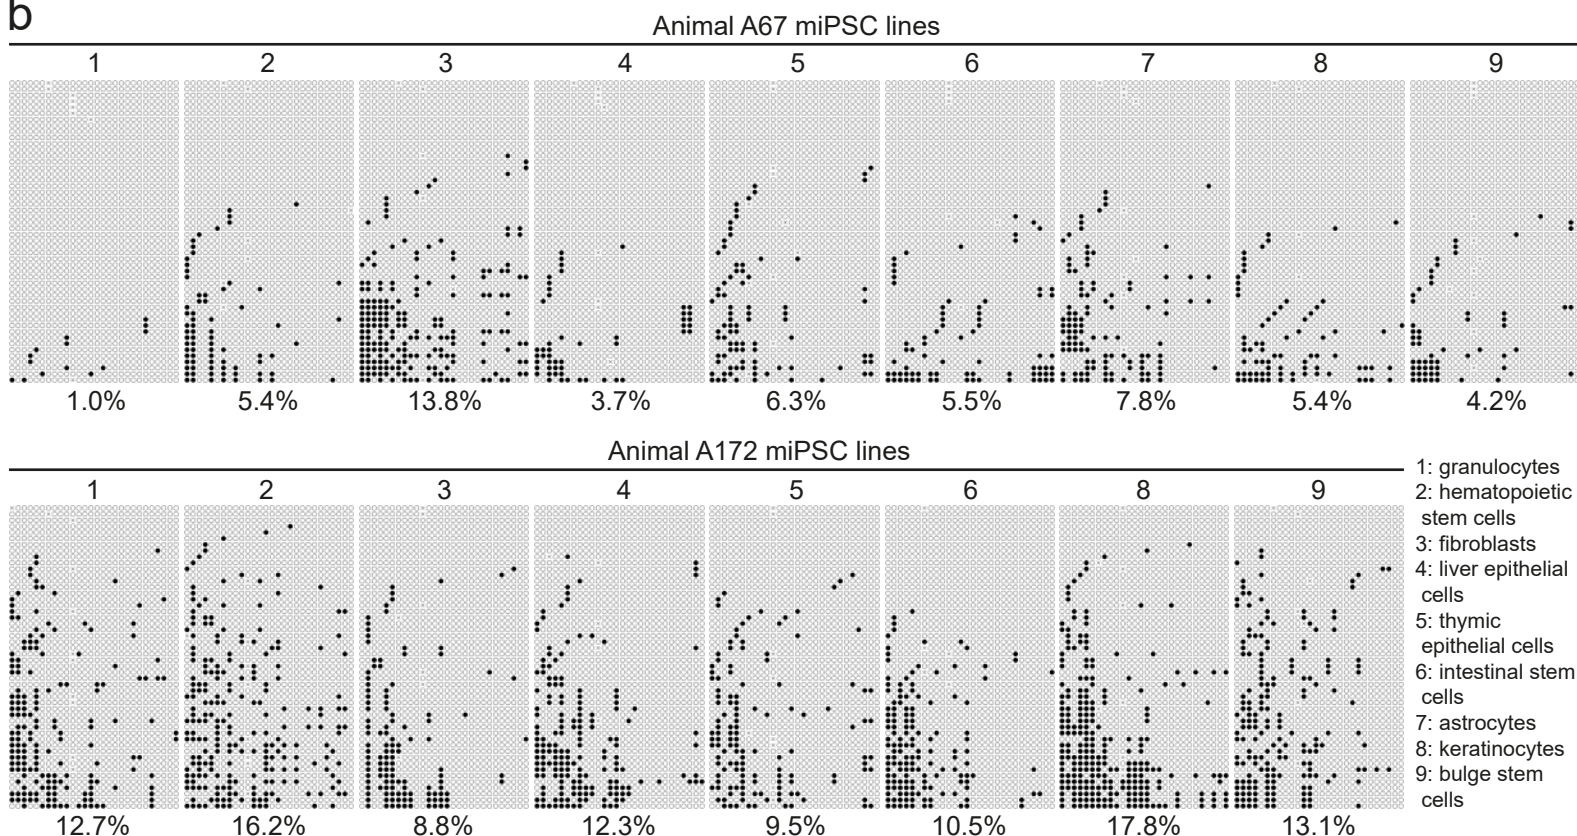

**Extended Data Fig. 5: Donor L1 hypomethylation in MEFs and miPSCs.** **a**, *top left*: Locus-specific methylation analysis design for a donor L1 found to generate insertion miPSC\_10\_L1 in a MEF-derived single-cell miPSC clone (Clone 1). CpGs located in the first 3 monomers of the donor L1 were assessed. Orange and grey strokes indicate CpGs covered and not covered, respectively, by sequencing the amplicon with 2×300mer Illumina reads. *bottom right*: Methylation of the donor L1 promoter sequence in four single-cell miPSC clones, including Clone 1, cultured in either serum or 2i conditions, and the parental MEF population. Each cartoon panel corresponds to an amplicon and displays 50 non-identical randomly selected sequences (black circle, methylated CpG; white circle, unmethylated CpG; ×, mutated CpG). The percentage of methylated CpG is indicated underneath each cartoon. **b**, Donor L1 methylation data as per panel (a) except for bulk miPSC lines derived from two animals (A67 and A172) carrying the polymorphic donor L1.

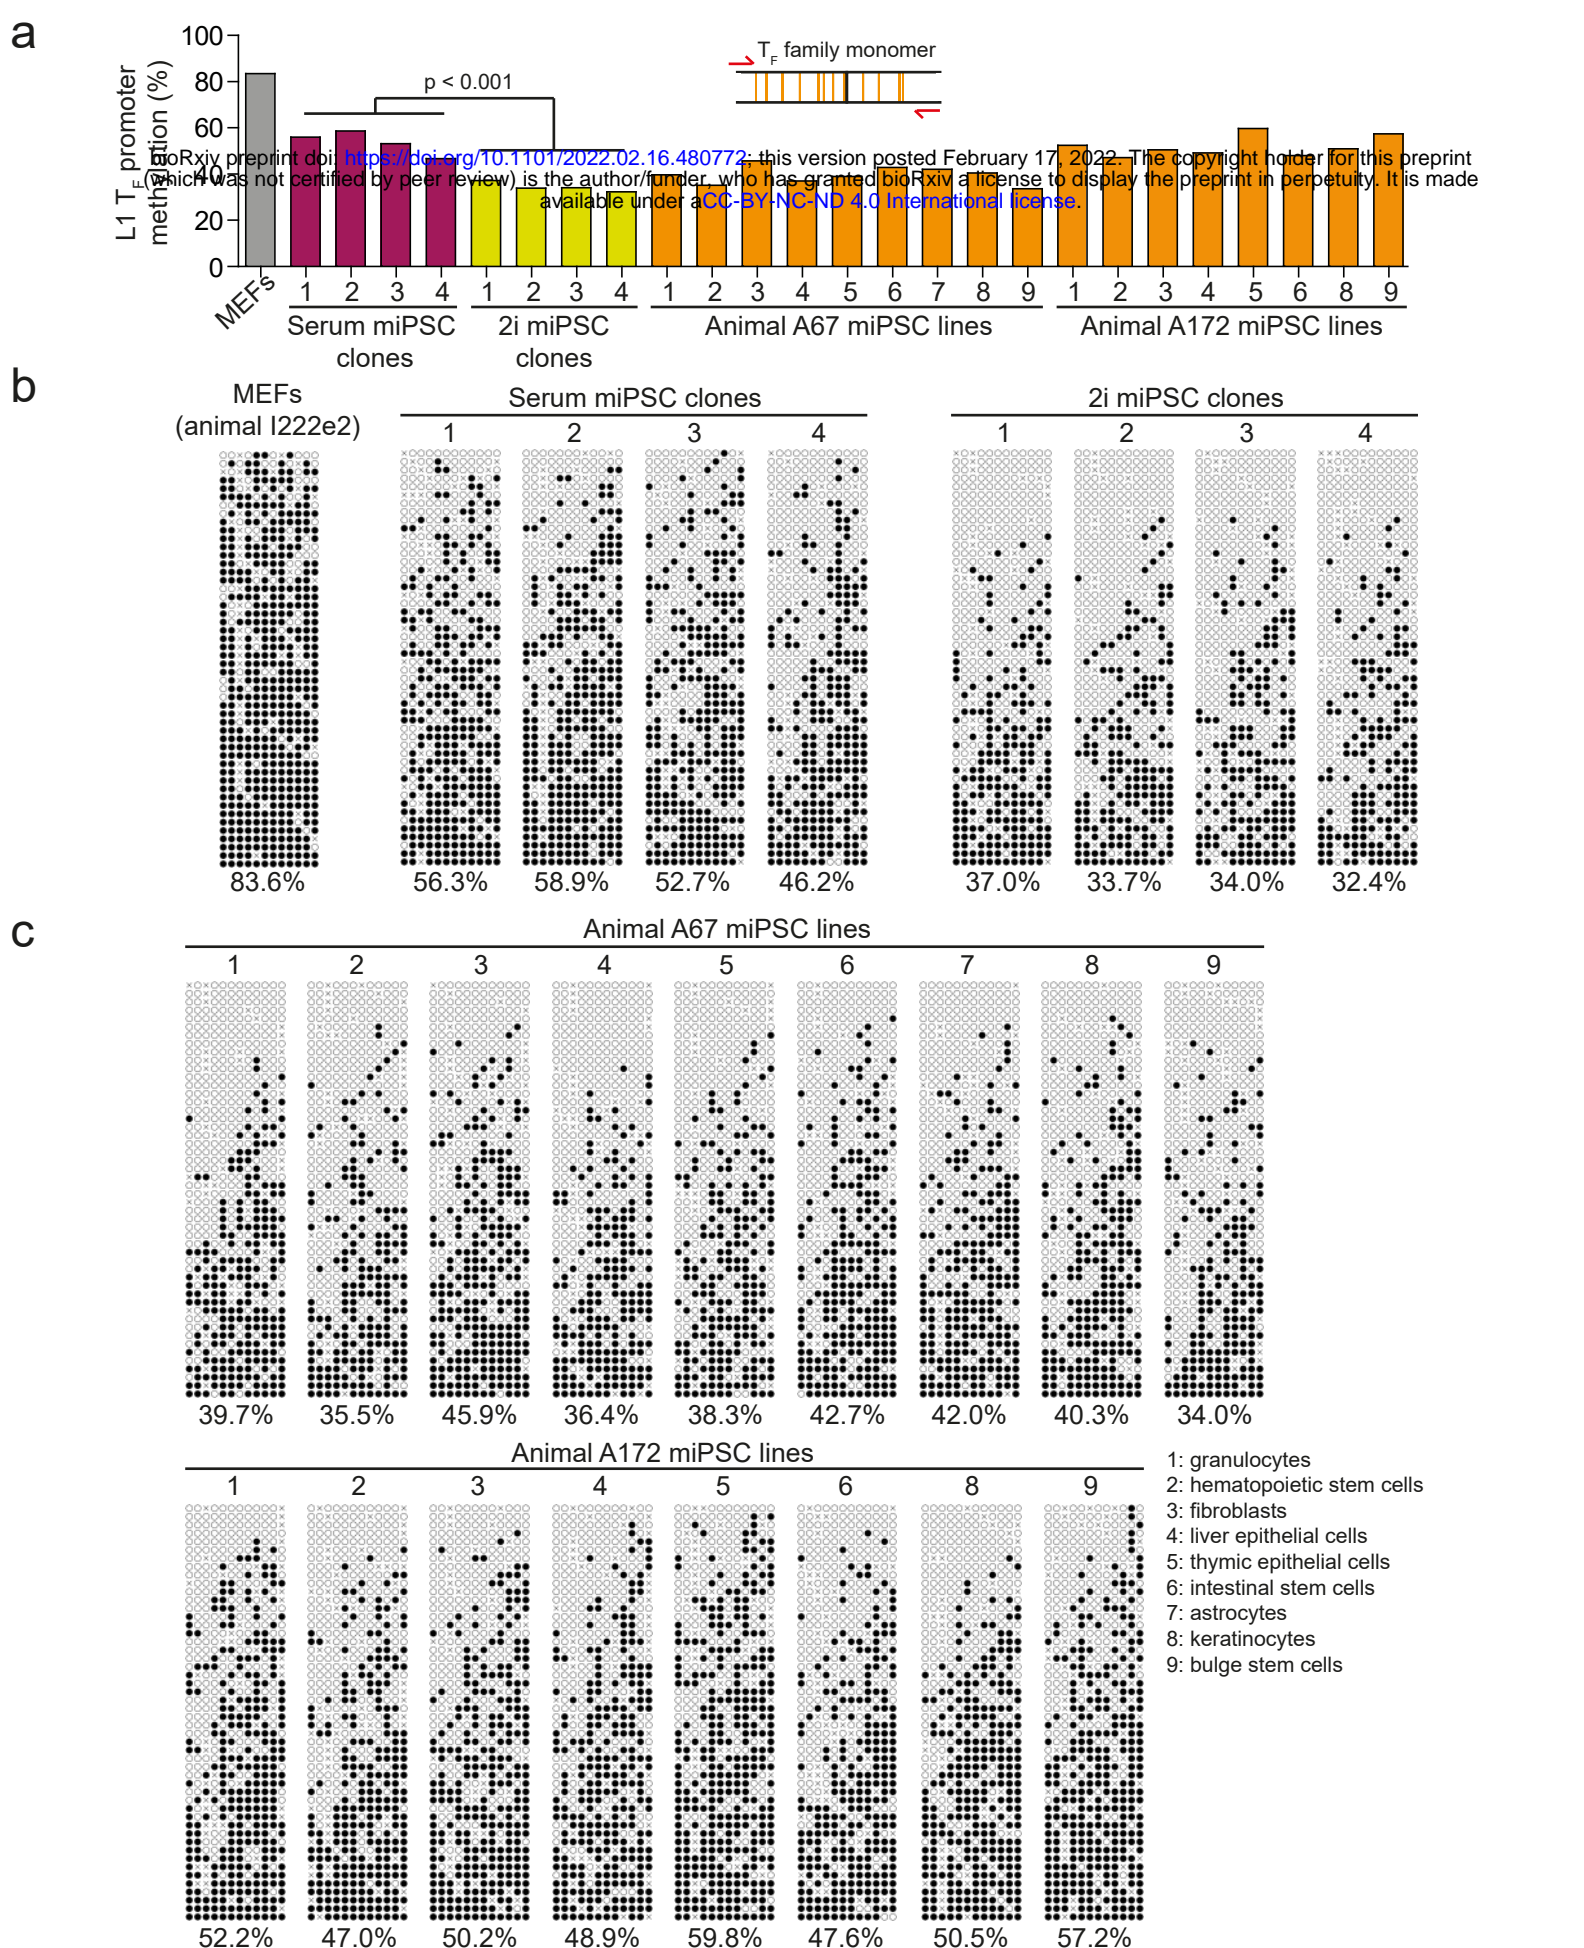

**Extended Data Fig. 6: L1  $T_F$  subfamily promoter monomer methylation.** **a**, L1  $T_F$  monomer CpG methylation in MEFs, single-cell miPSC clones, and bulk miPSCs derived from primary cells. *top*: Assay design and primer locations with respect to L1  $T_F$  monomer structure. Orange strokes indicate CpGs covered by the assay. *bottom*: Histogram data represent the mean percentage methylation of 50 non-identical bisulfite converted sequences selected at random from each sample. A two-tailed t test ( $p < 0.001$ ) was used to compare serum and 2i culture conditions for single-cell miPSC clones 1-4. **b**, L1  $T_F$  methylation in four single-cell miPSC clones and parental MEFs. Each cartoon panel corresponds to an amplicon and displays 50 non-identical randomly selected sequences (black circle, methylated CpG; white circle, unmethylated CpG;  $\times$ , mutated CpG). Methylated CpG percentage is indicated underneath each cartoon. **c**, As per panel (b) except for bulk miPSC lines derived from animals A67 and A172. Note that this assay surveys CpG methylation for  $T_F$  monomers genome-wide without retaining their position within individual L1 loci.

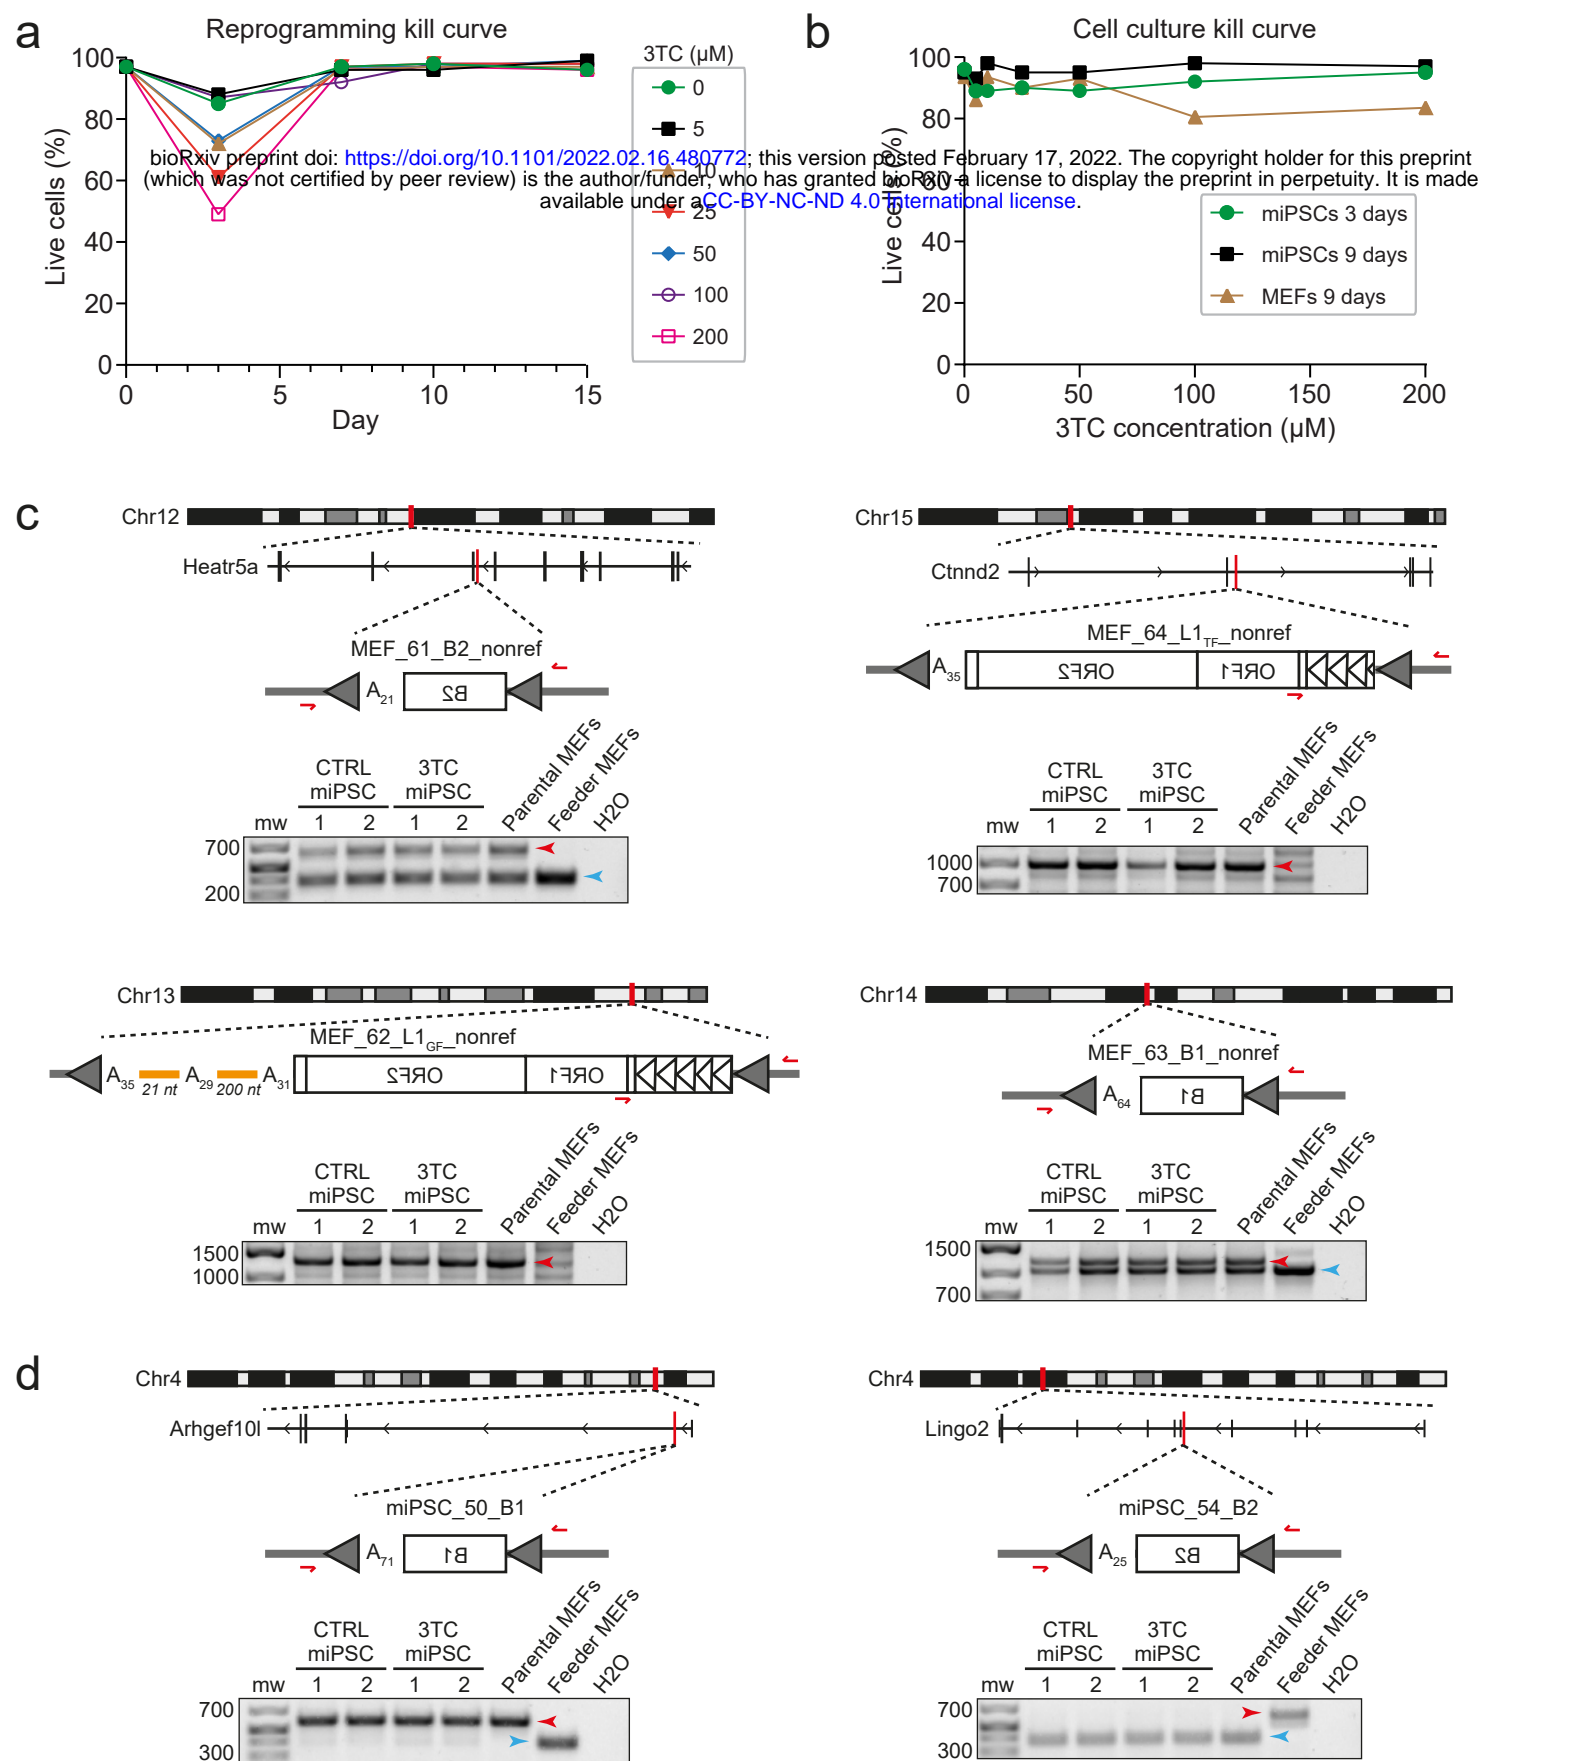

bioRxiv preprint doi: <https://doi.org/10.1101/2022.02.16.480772>; this version posted February 17, 2022. The copyright holder for this preprint (which was not certified by peer review) is the author/funder, who has granted bioRxiv a license to display the preprint in perpetuity. It is made available under aCC-BY-NC-ND 4.0 International license.

**Extended Data Fig. 7: Supporting data for ONT sequencing of miPSCs reprogrammed with and without lamivudine.** **a**, Cell viability during MEF reprogramming to miPSCs in the presence of varying concentrations of lamivudine (3TC), as a function of days since reprogramming was induced by the addition of doxycycline. **b**, Cultured MEF and miPSC viability as a function of 3TC concentration. miPSCs were tested for 3 and 9 days in culture with 3TC, and MEFs tested for 9 days. **c**, Non-reference polymorphic TE insertions found by ONT sequencing, used as positive controls for PCR validation experimental designs. **d**, Putative *de novo* TE insertions detected in miPSC lines by ONT sequencing, and annotated as false positives based on PCR amplification in parental or feeder MEFs. Note: in panels (c) and (d), for each insertion, the chromosomal location and orientation are shown. L1 and SINE B1 and B2 insertions are represented by white rectangles. L1 5'UTR promoter monomers are indicated by triangles. Poly(A) tracts and their length are indicated ( $A_n$ ), and target site duplications (TSDs) are depicted as grey arrows. 3' transductions are shown as orange lines. PCR validation primers are shown as red arrows. PCR products in agarose gels used to confirm TE insertions are indicated by red arrows. Empty site (wild-type) amplicons are indicated by blue arrows, where applicable.

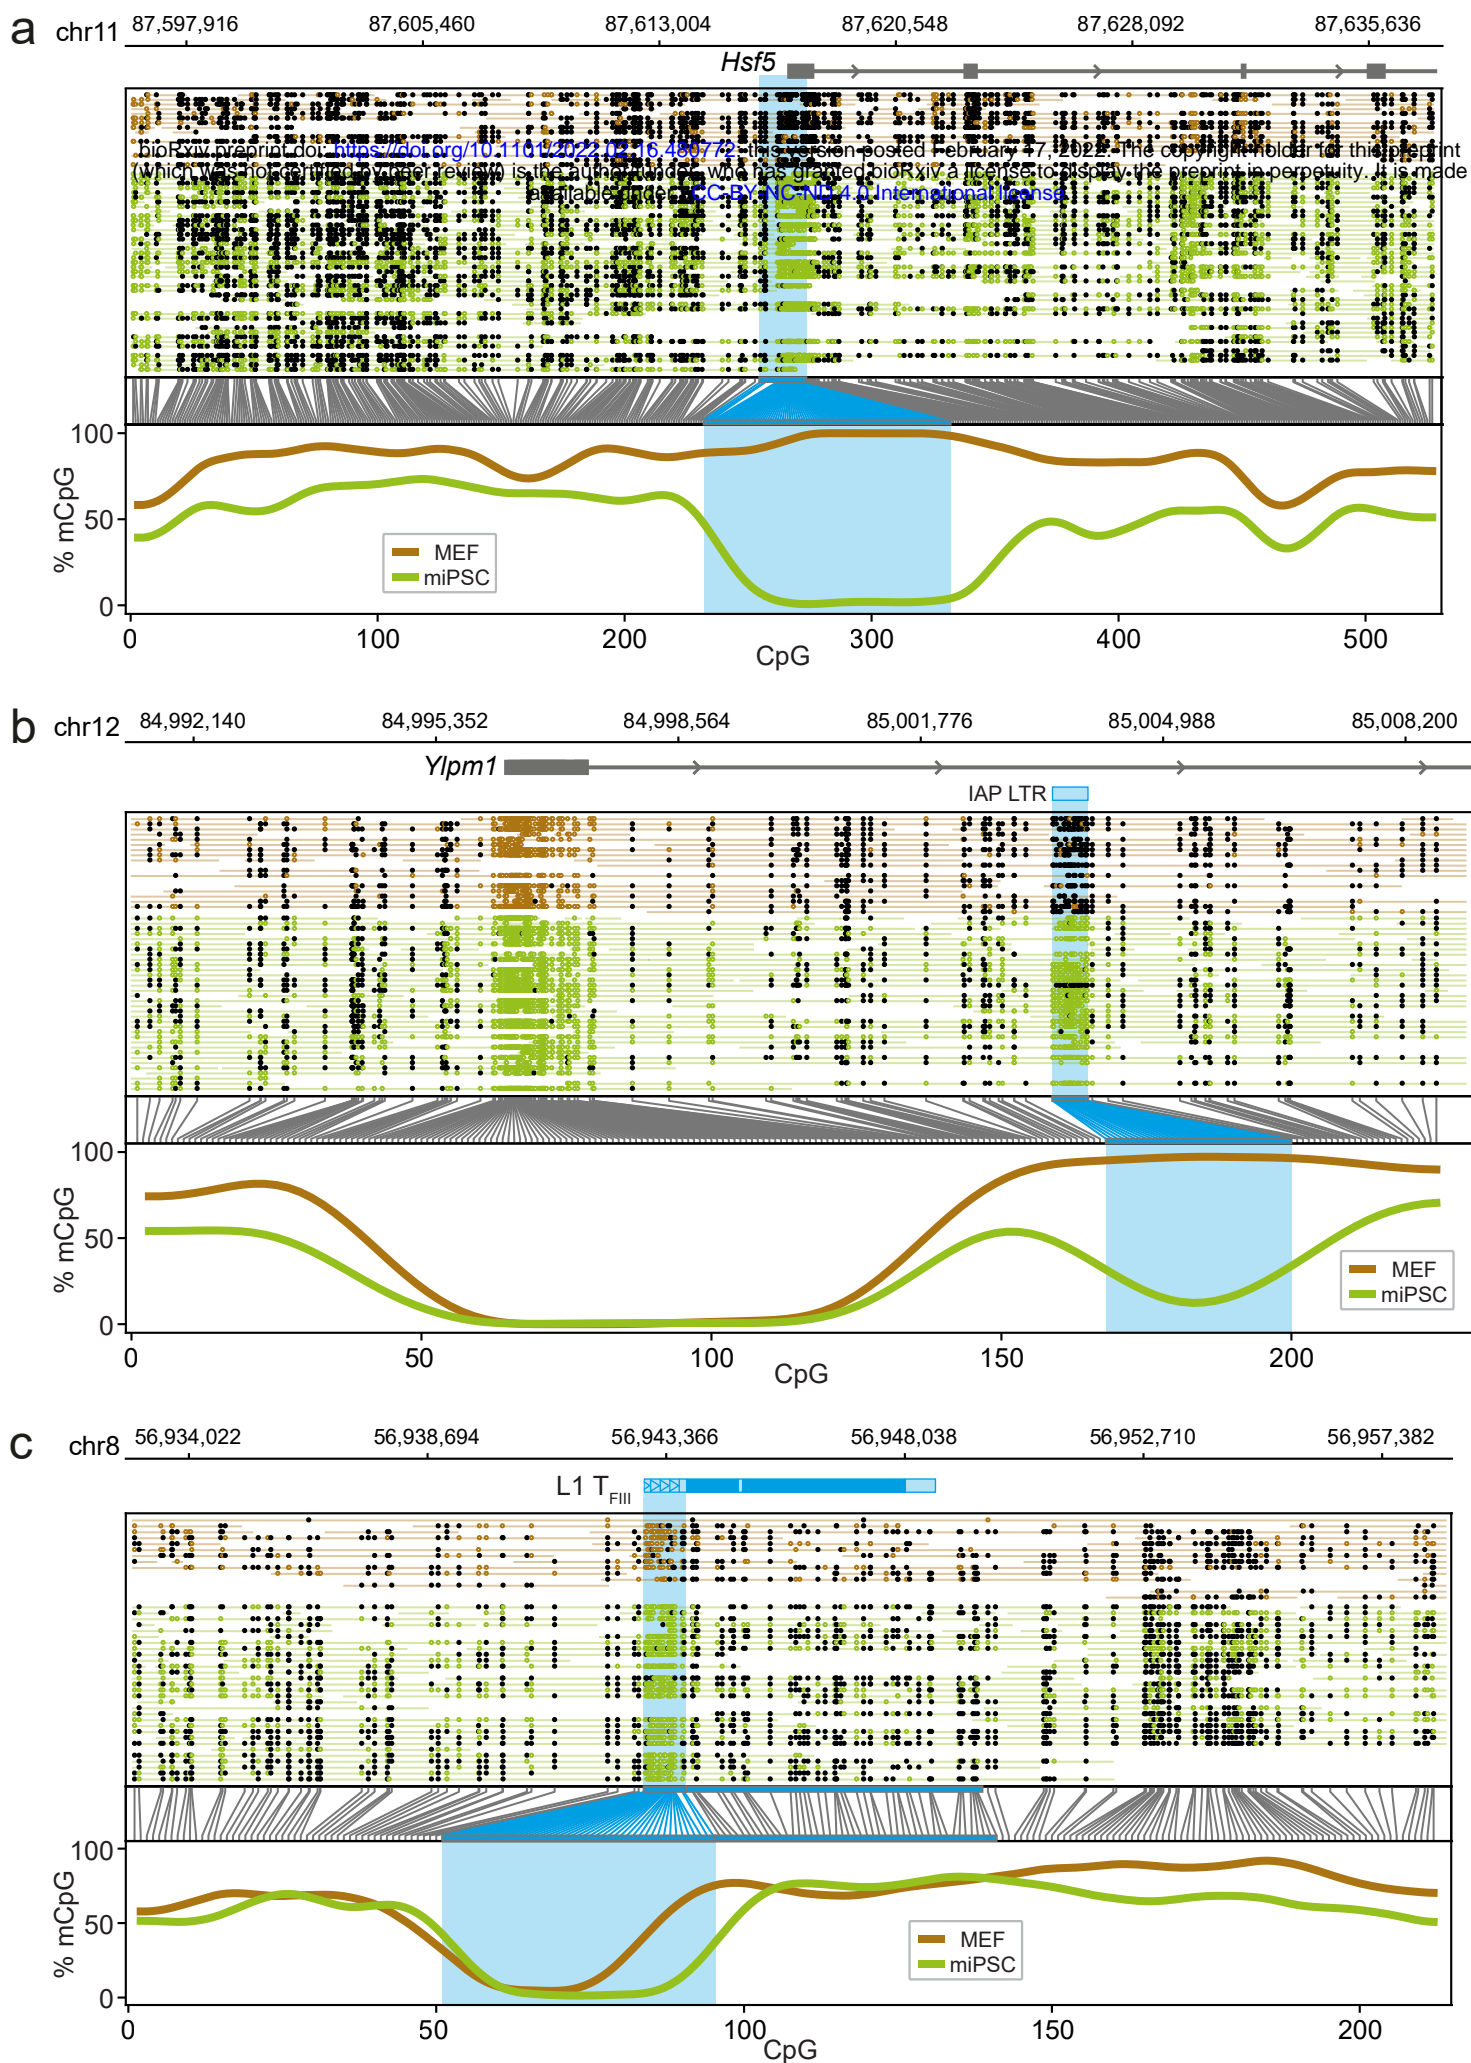

**Extended Data Fig. 8: Examples of protein-coding gene and TE methylation, as surveyed by ONT sequencing.** Methylation profiles are shown for **a**, the *Hsf5* gene promoter **b**, an IAP LTR intronic to *Ylpm1*, and **c**, an intergenic L1 T<sub>F</sub>. For each example, the panels are arranged as per Fig. 3e. ONT data are shown for MEFs and a representative miPSC line untreated with lamivudine (CTRL 2).
